# Supplementary material for: FLT3-ITD Activates RSK1 to Enhance Proliferation and Survival of AML Cells by Activating mTORC1 and eIF4B Cooperatively with PIM or PI3K and by Inhibiting Bad and BIM
Source: MDPI journal article supplement (doi:10.3390/cancers11121827), 2019-11-20

Figure 1B

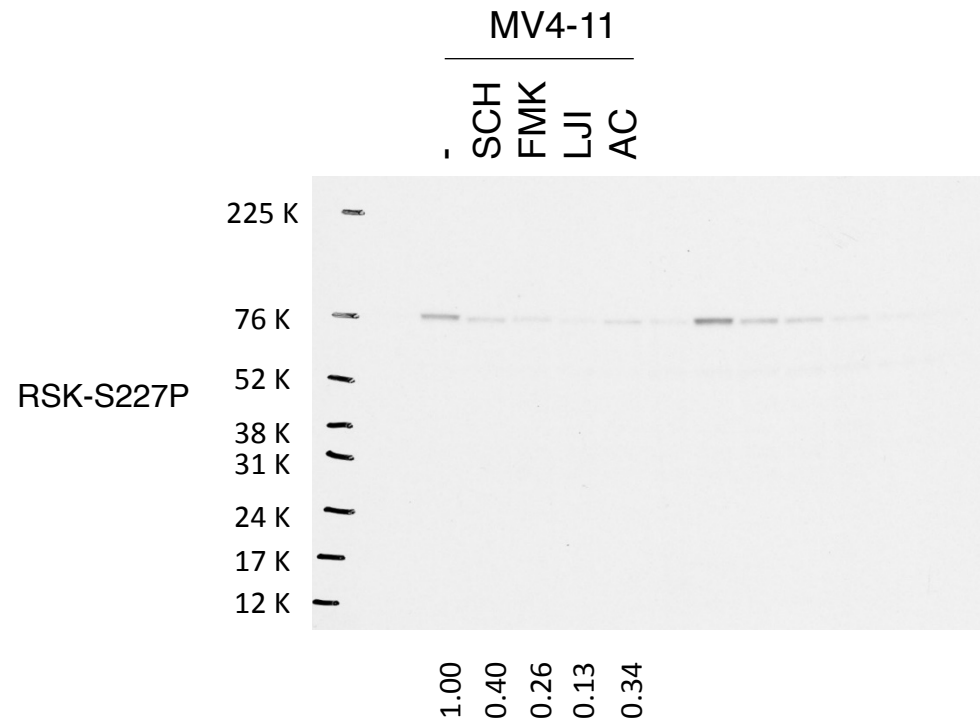

Figure 1B

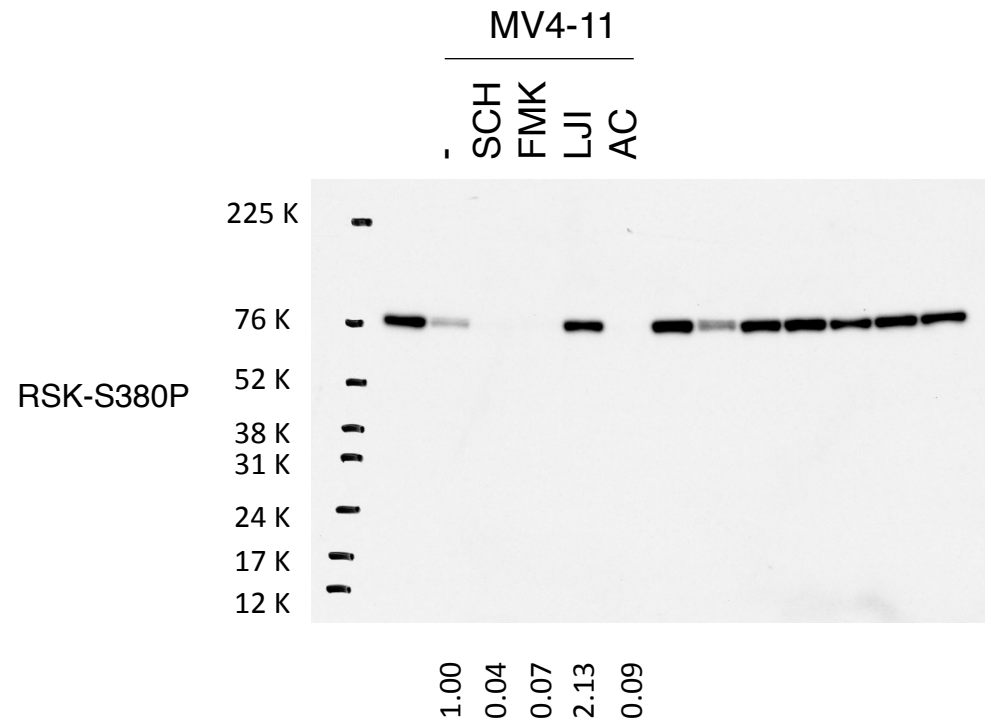

Figure 1B

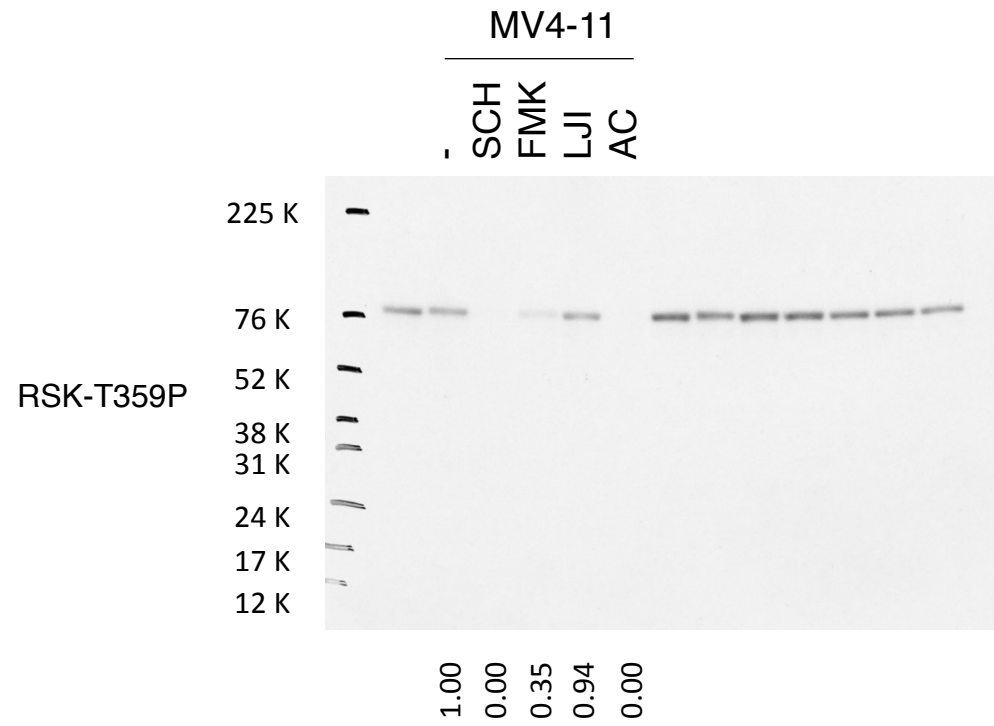

Figure 1B

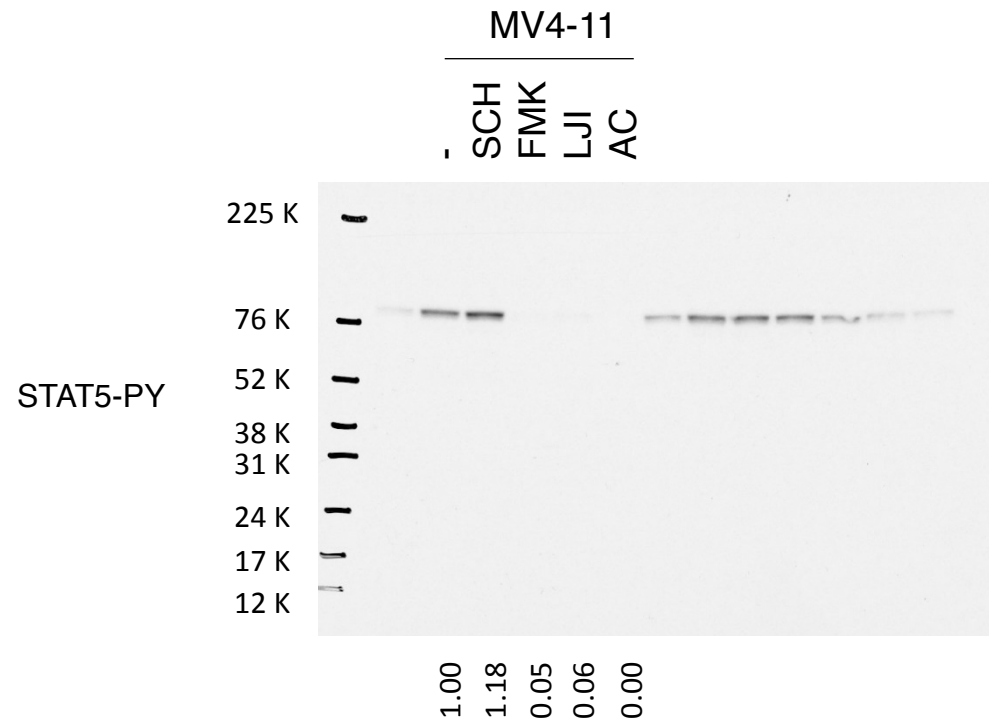

Figure 1B

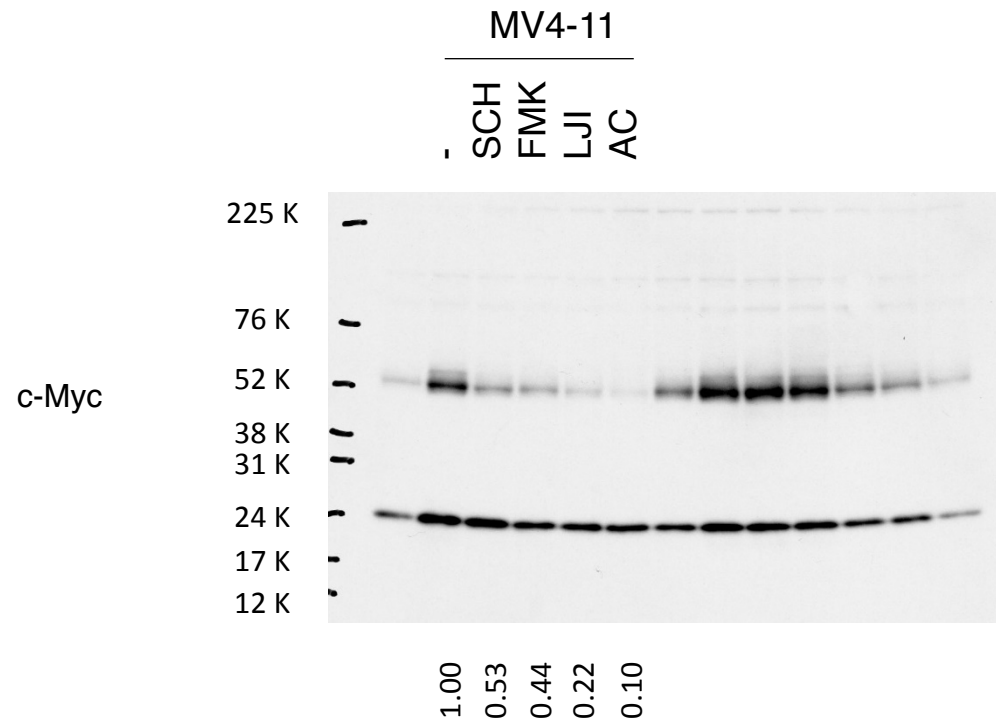

Figure 1B

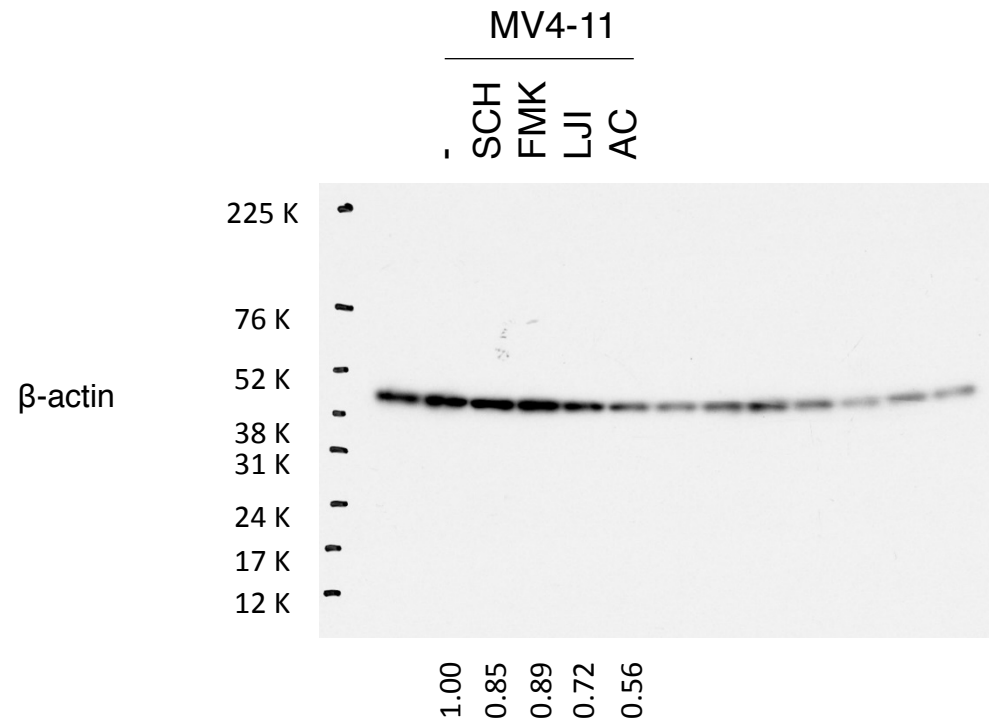

Figure 1B

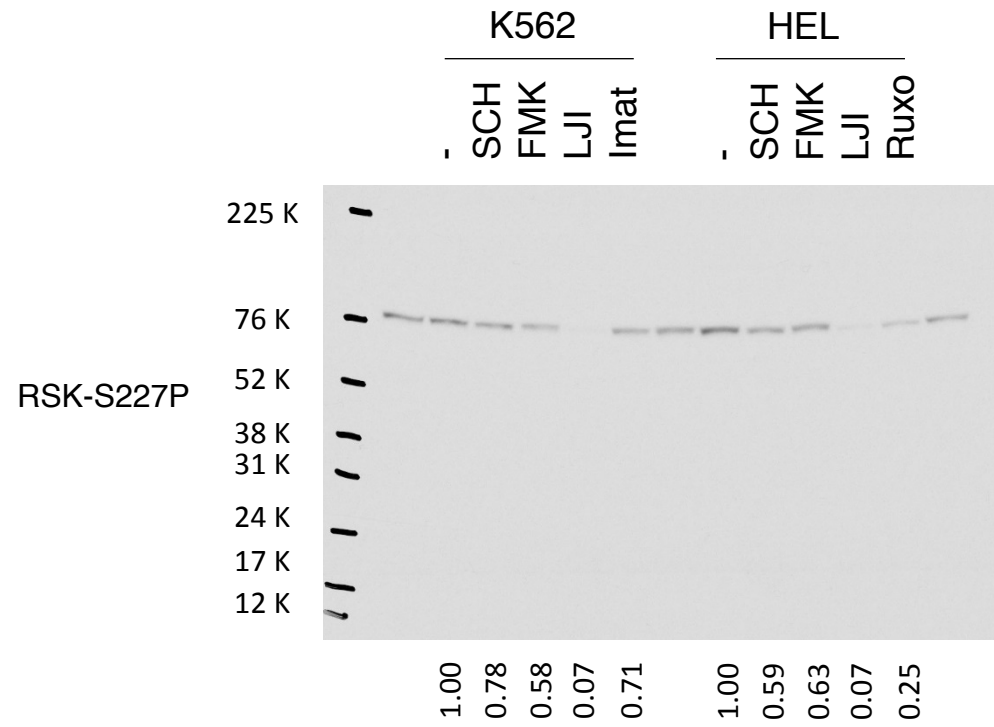

Figure 1B

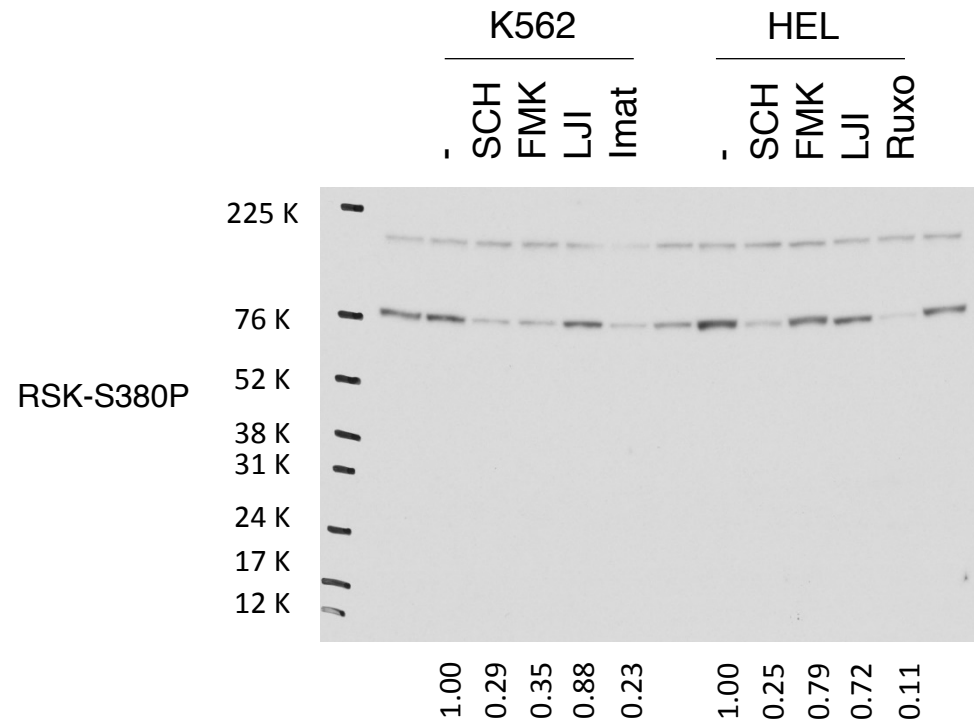

Figure 1B

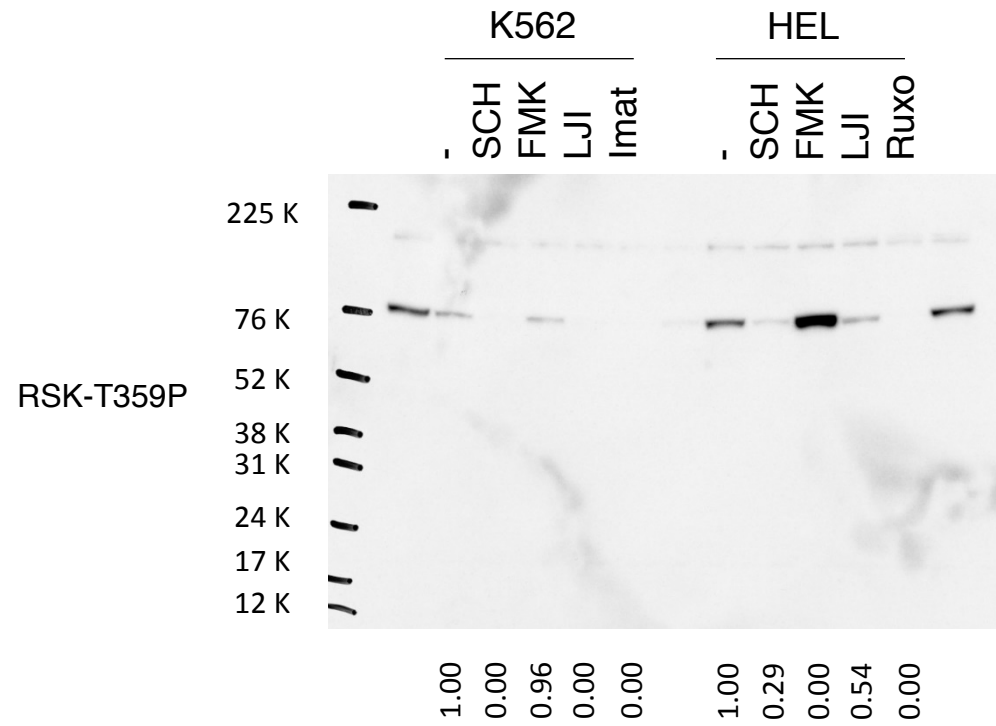

Figure 1B

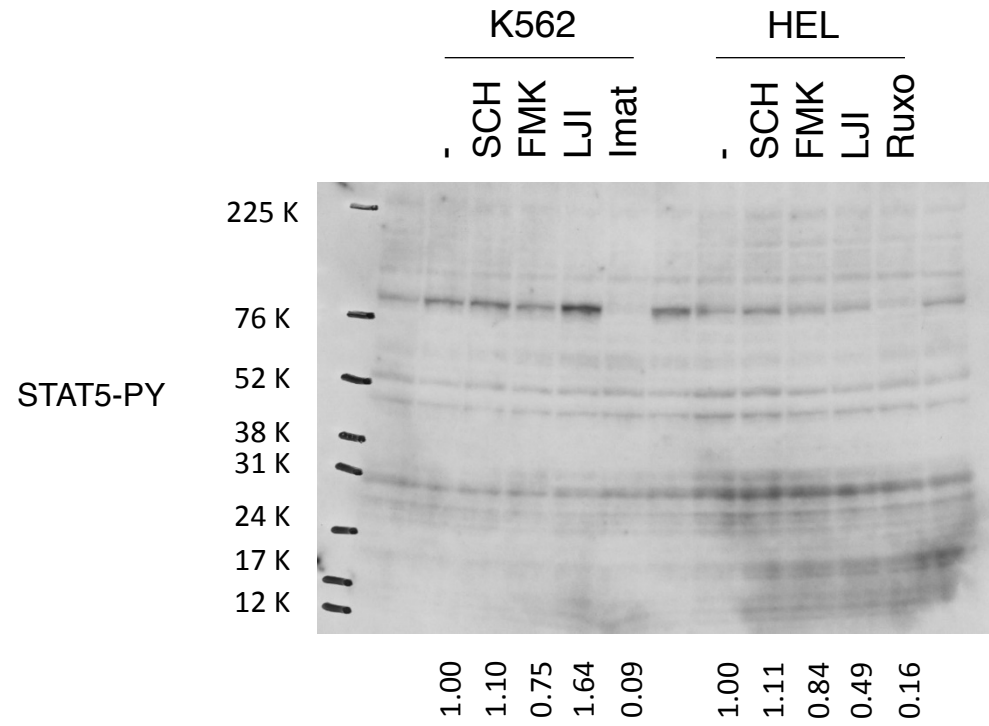

Figure 1B

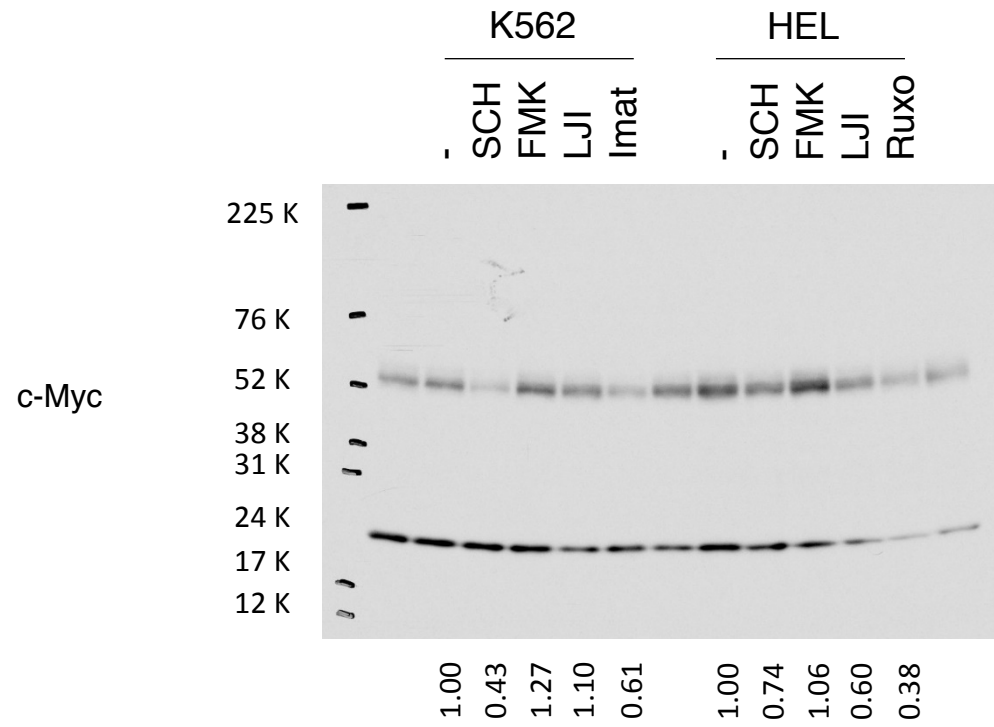

Figure 1B

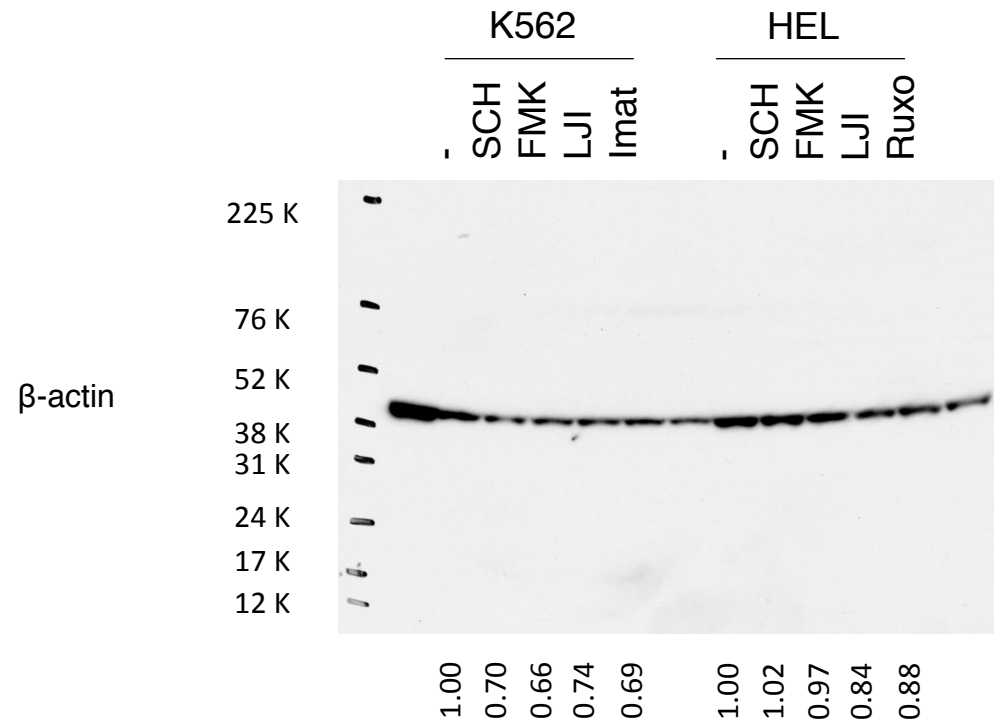

Figure 1C

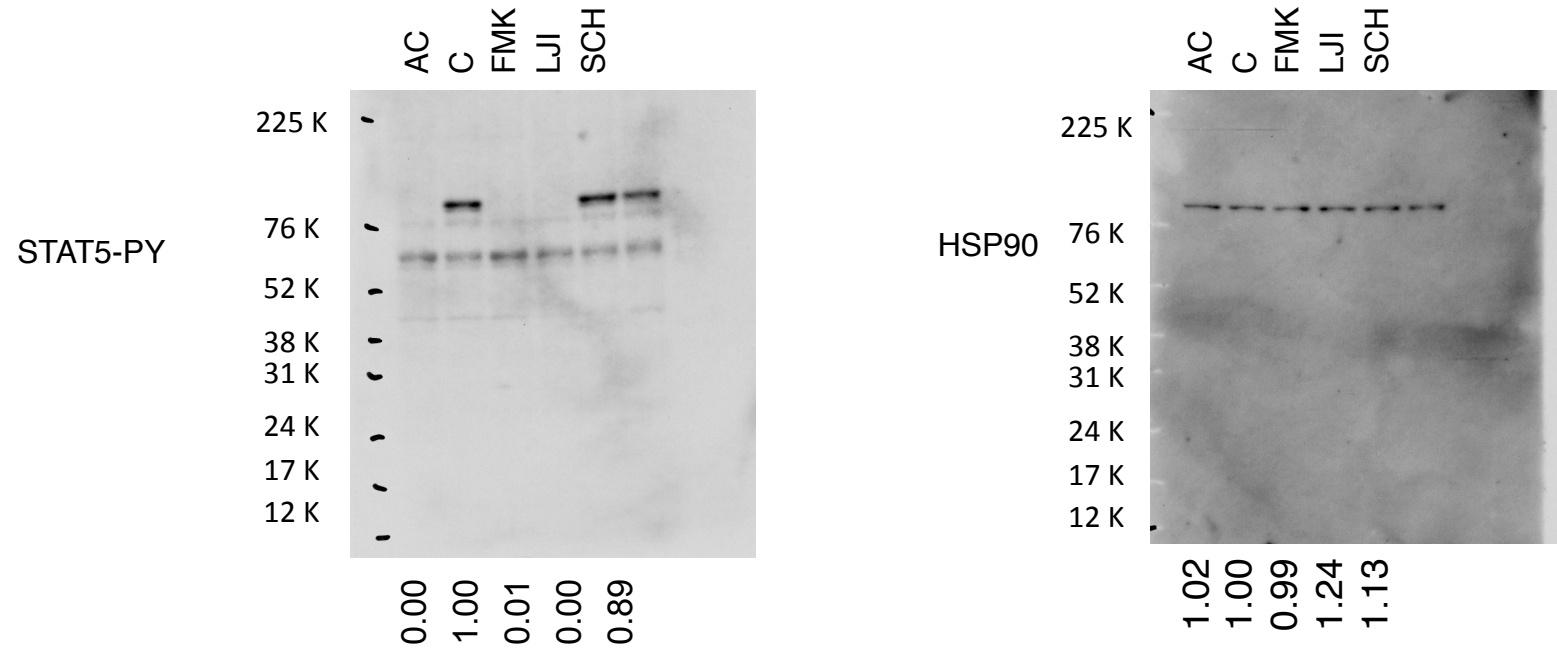

Figure 1D

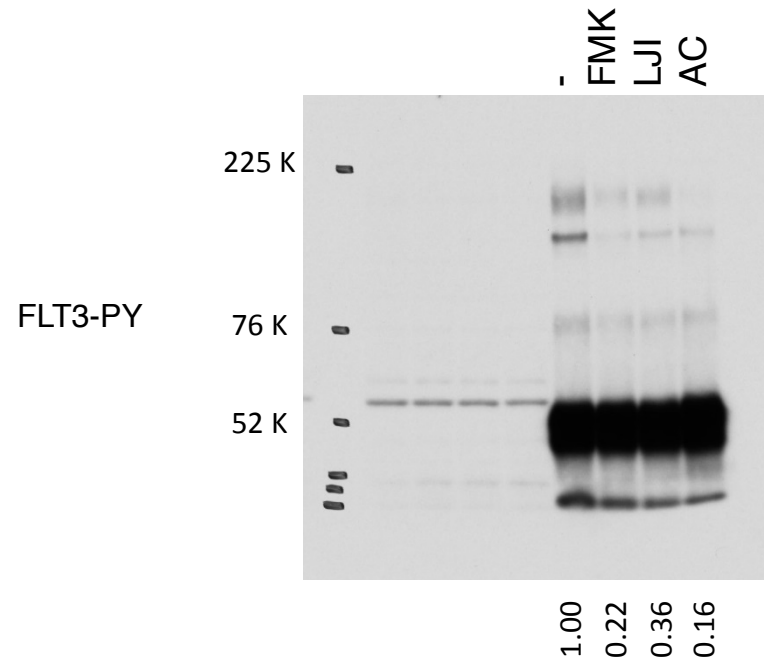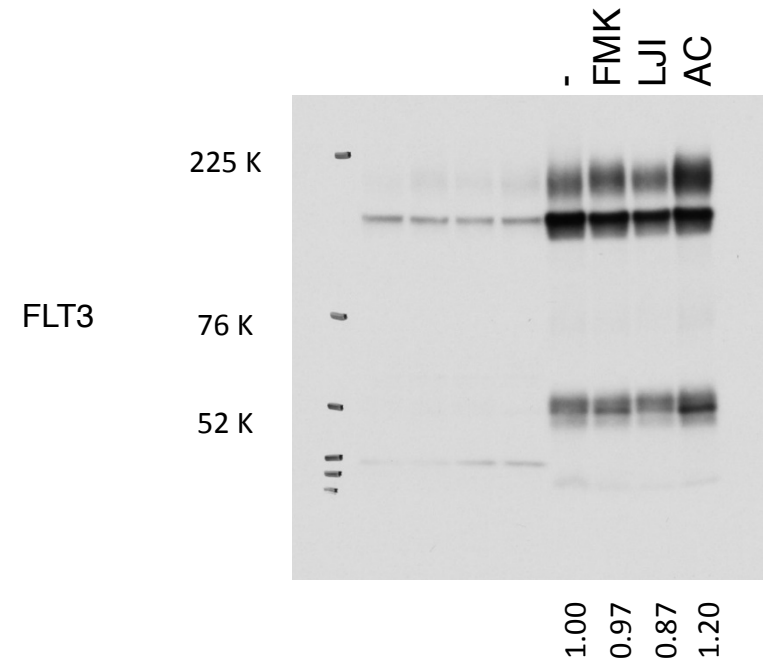

Figure 1E

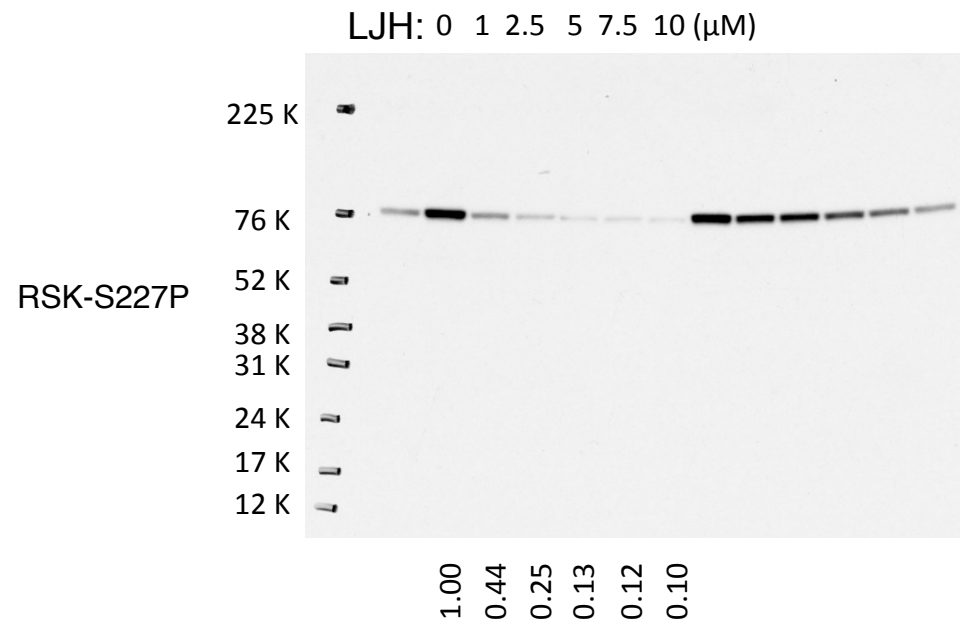

Figure 1E

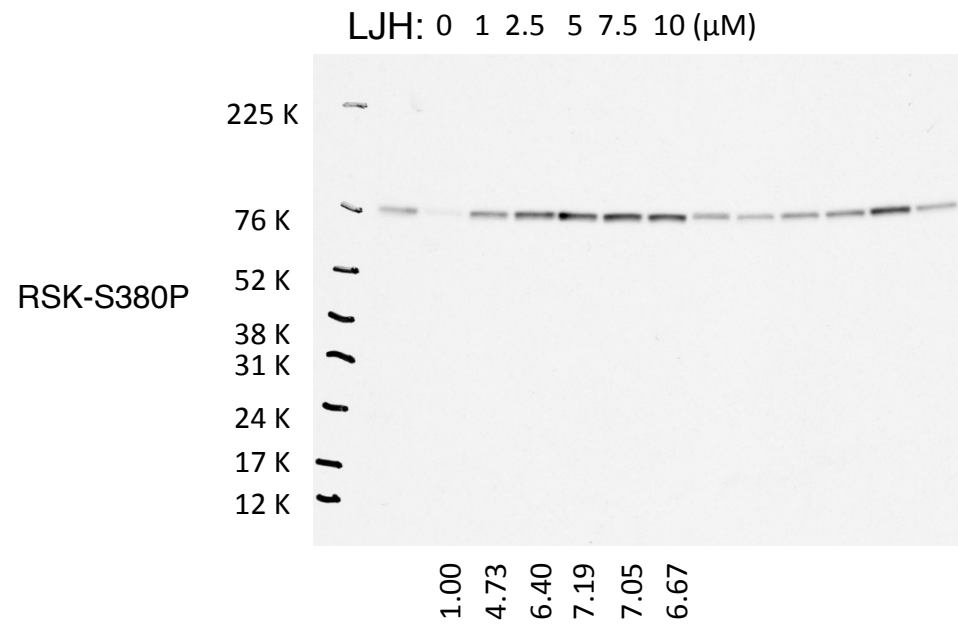

Figure 1E

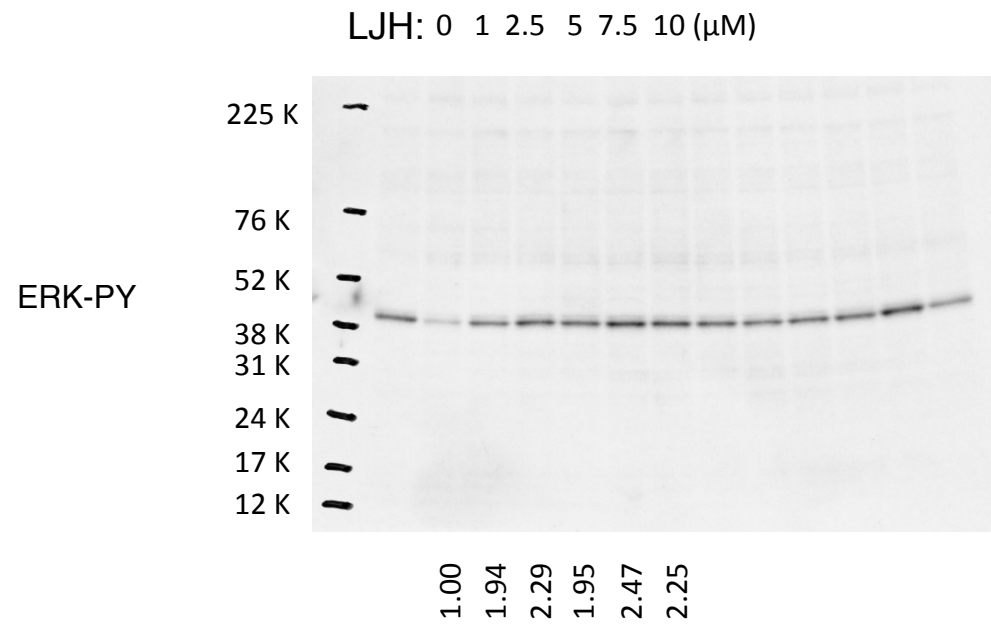

Figure 1E

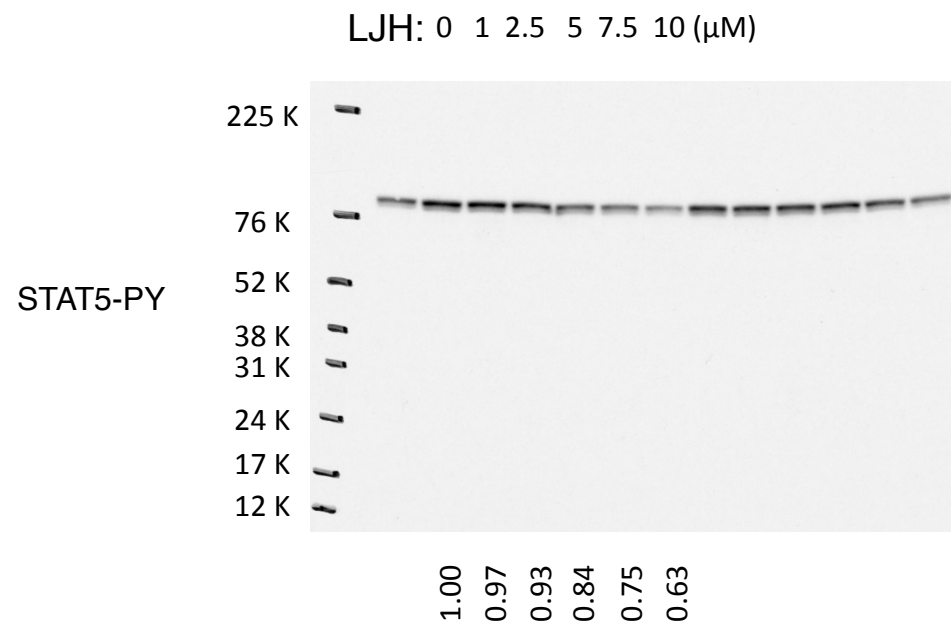

Figure 1E

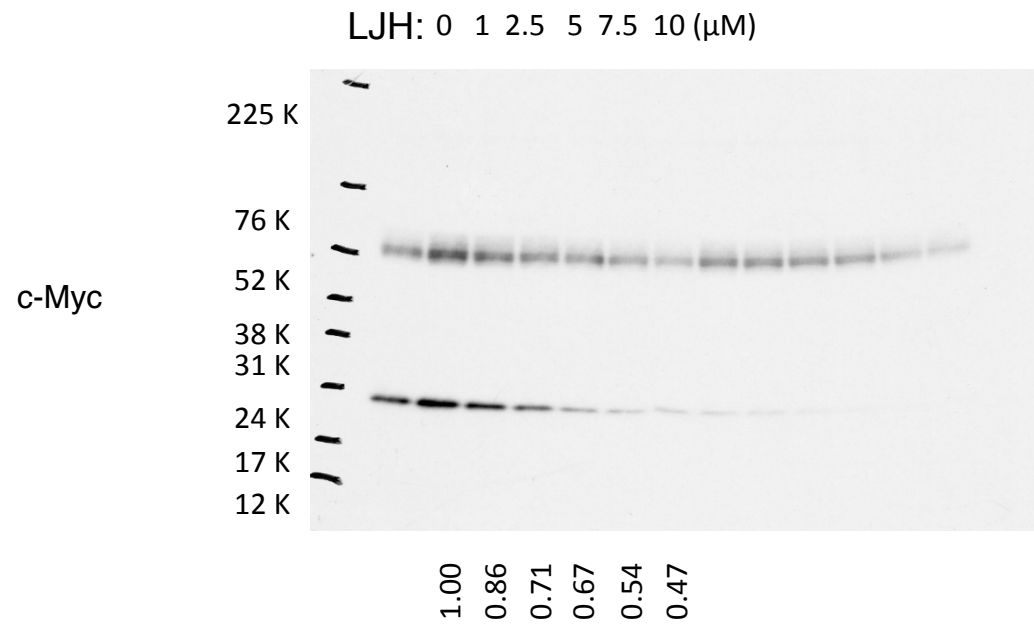

Figure 1E

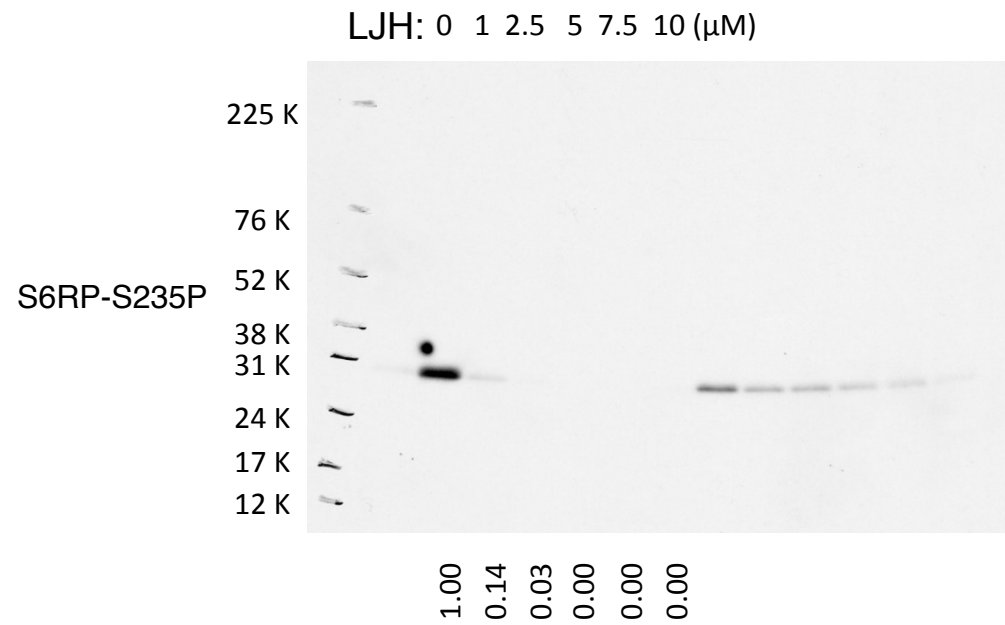

Figure 1E

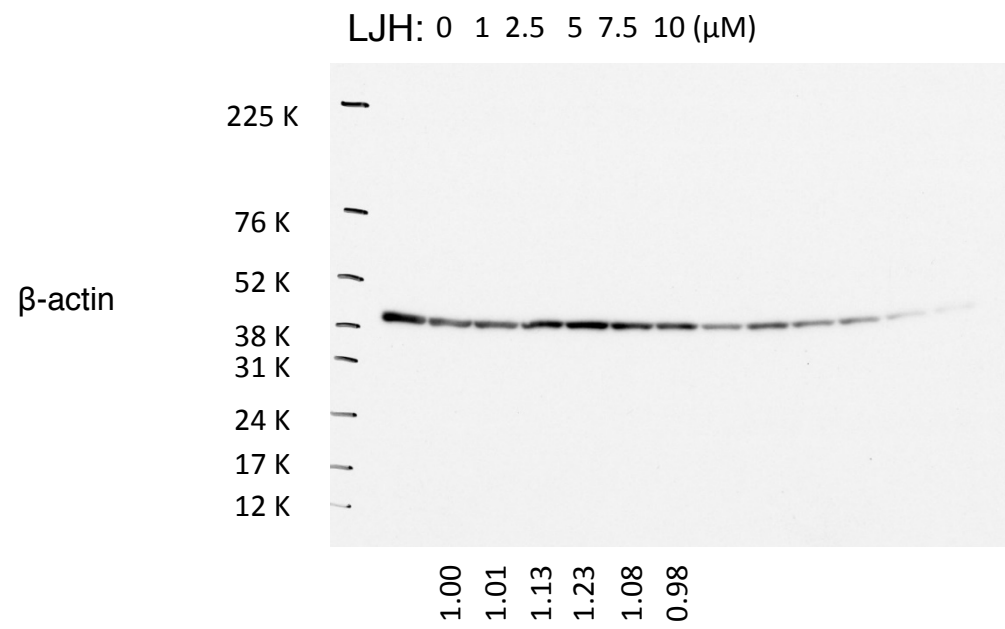

Figure 2B

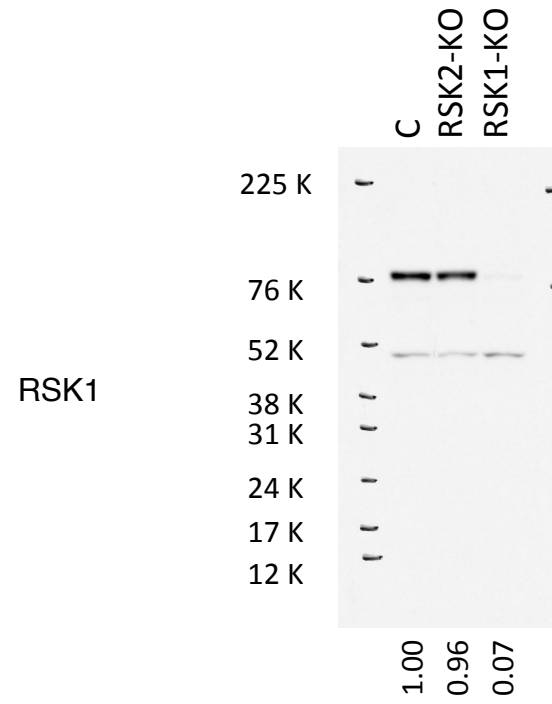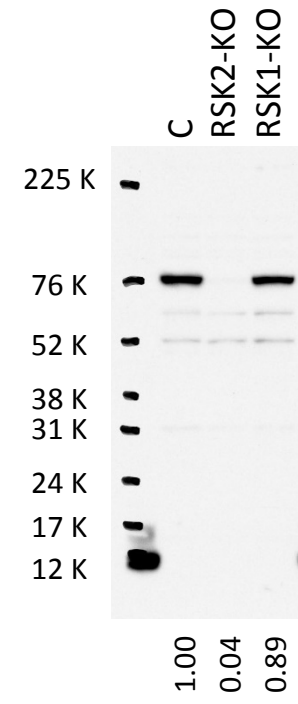

Figure 2B

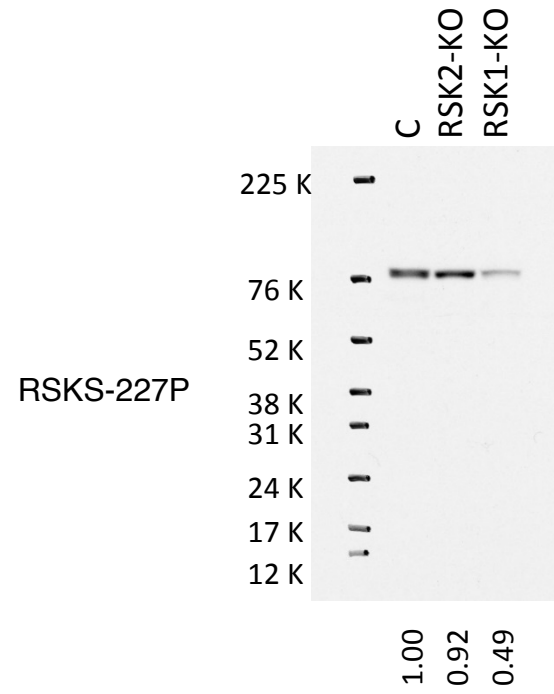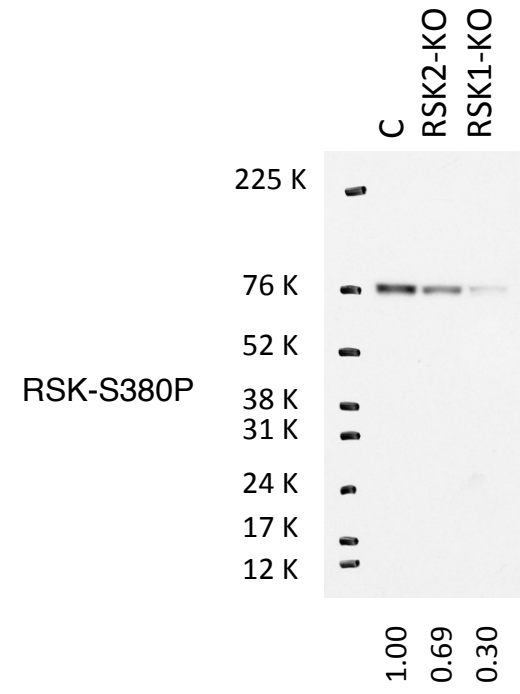

Figure 2B

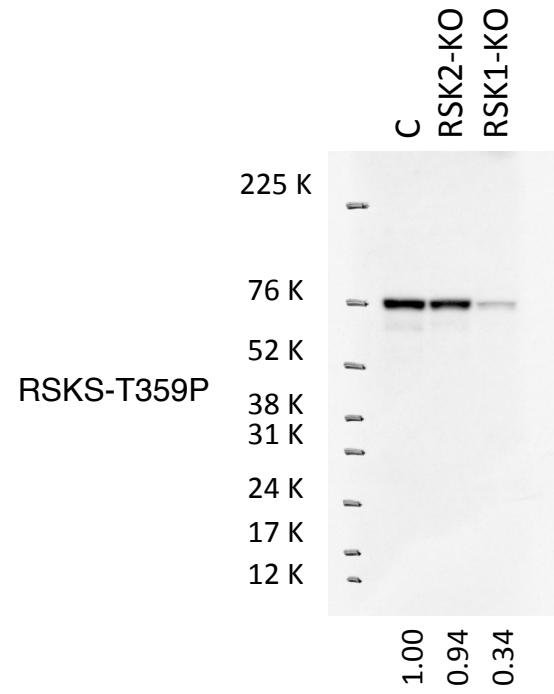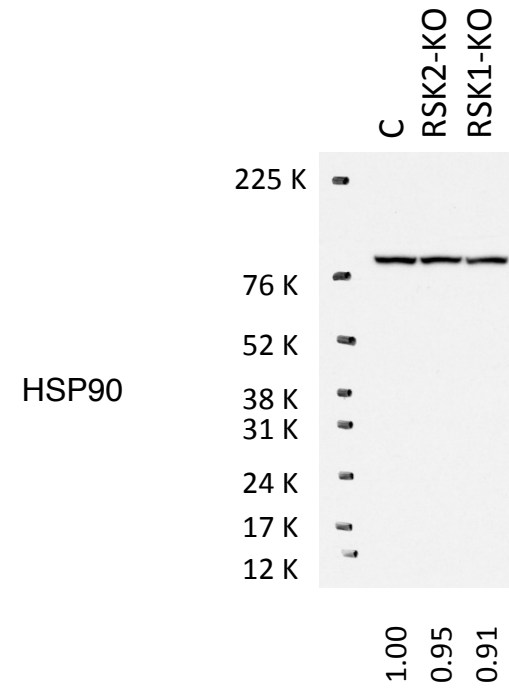

Figure 2D

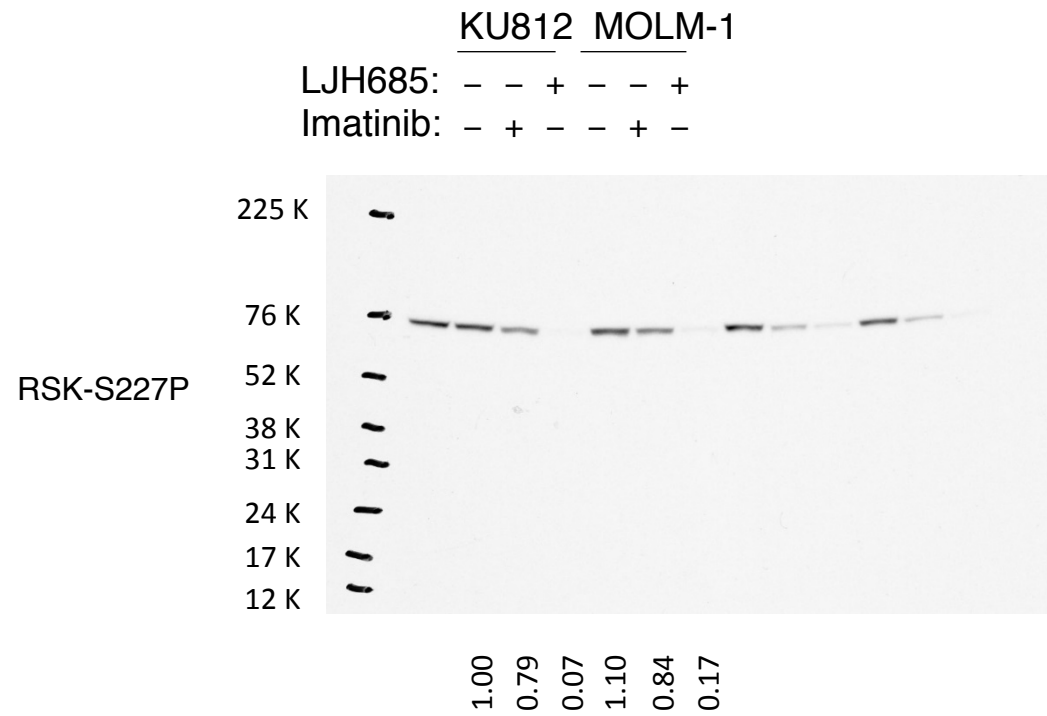

Figure 2D

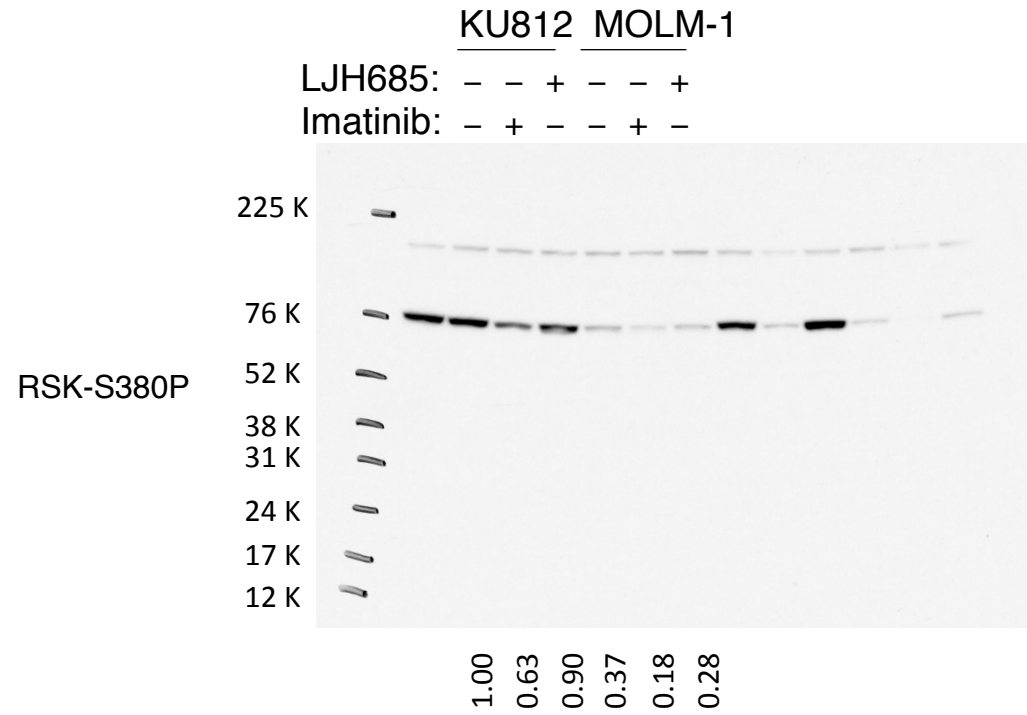

Figure 2D

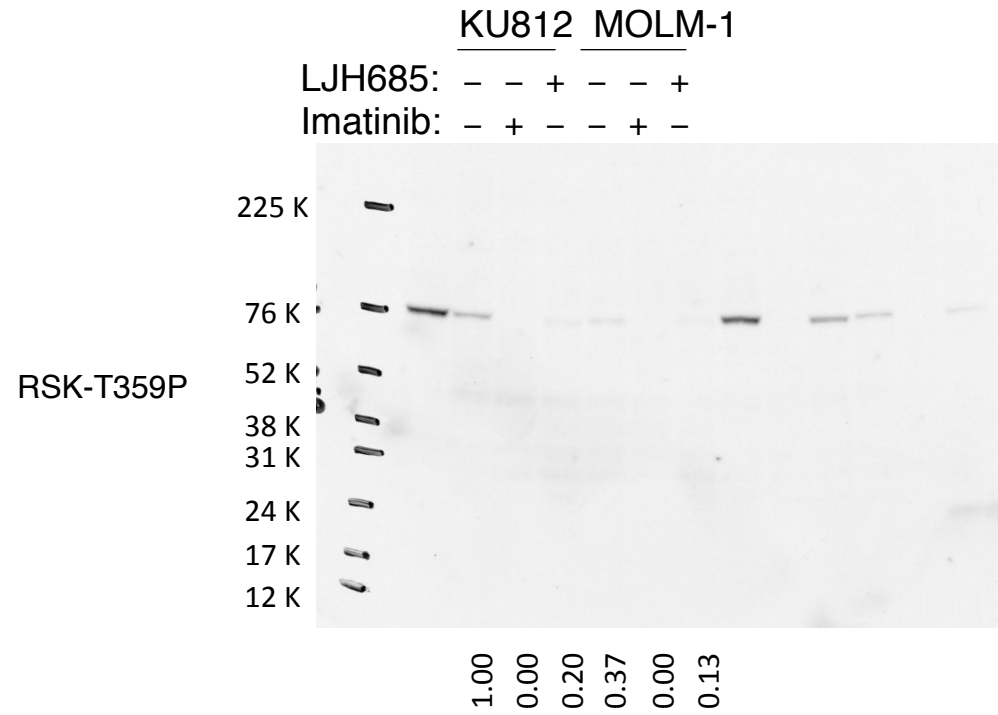

Figure 2D

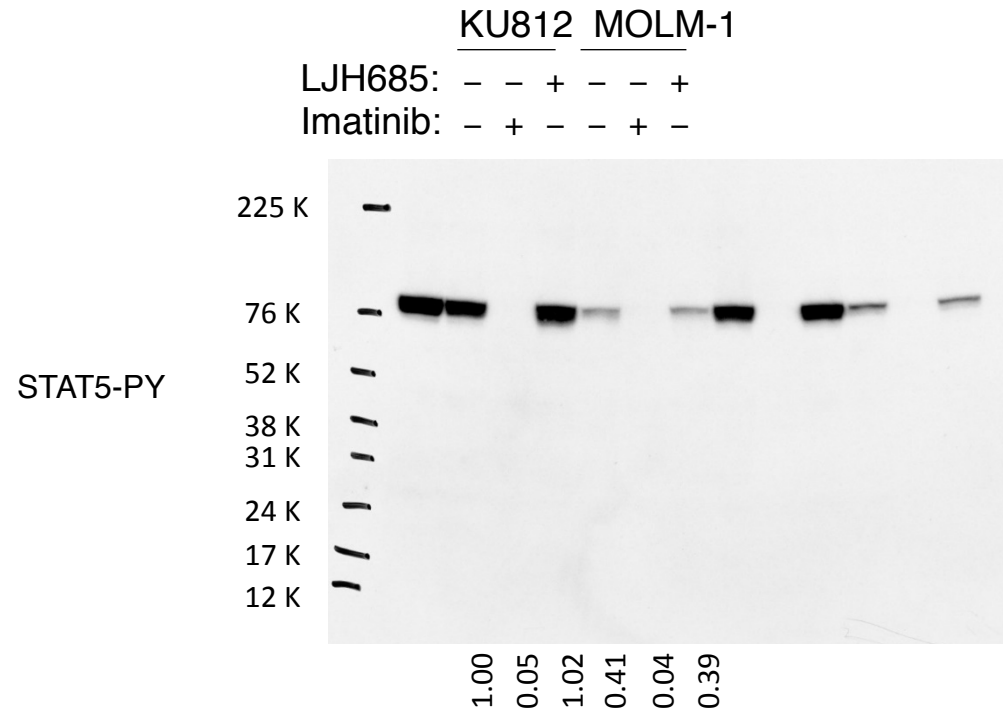

Figure 2D

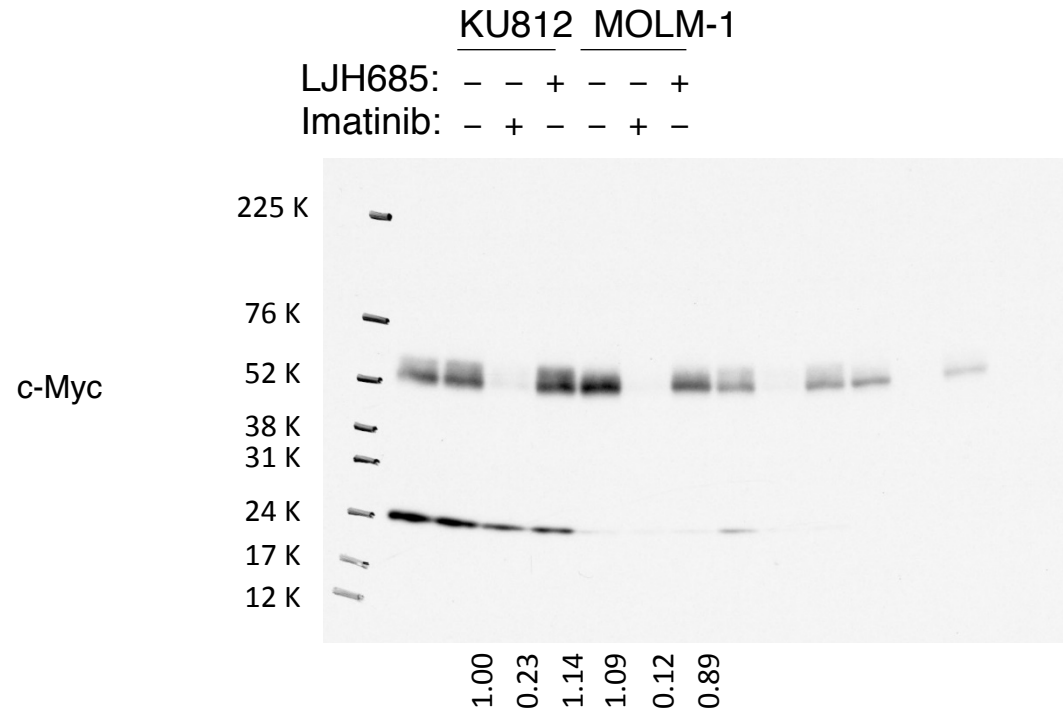

Figure 2D

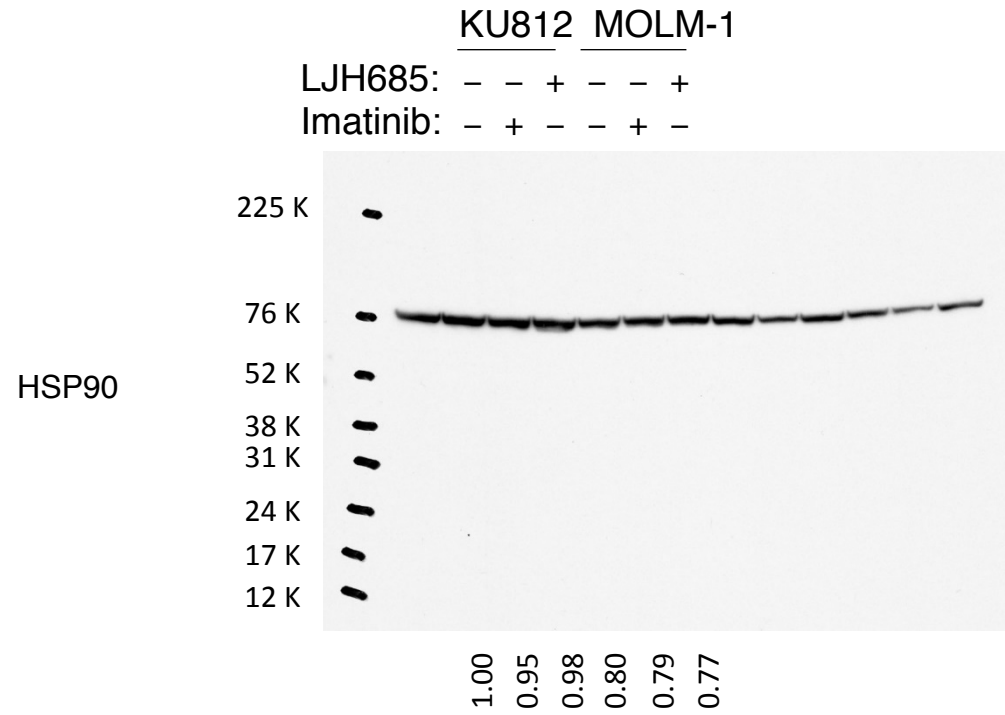

Figure 2F

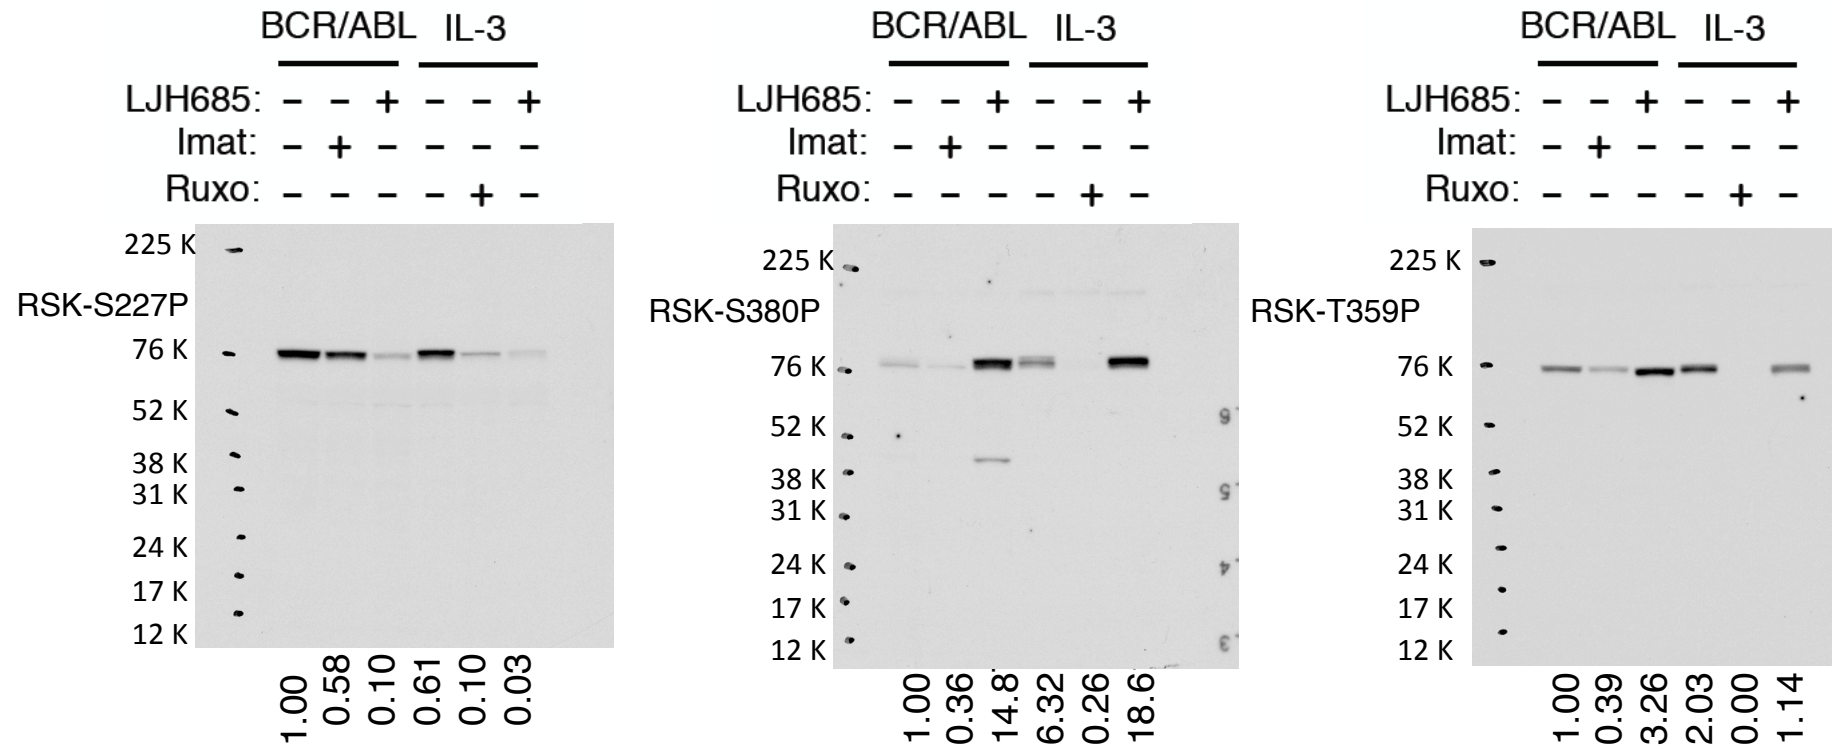

Figure 2F

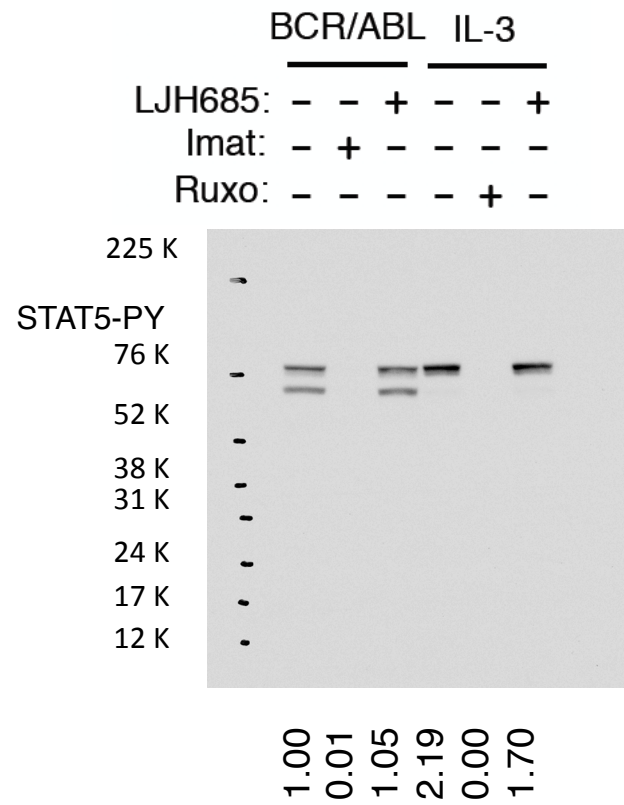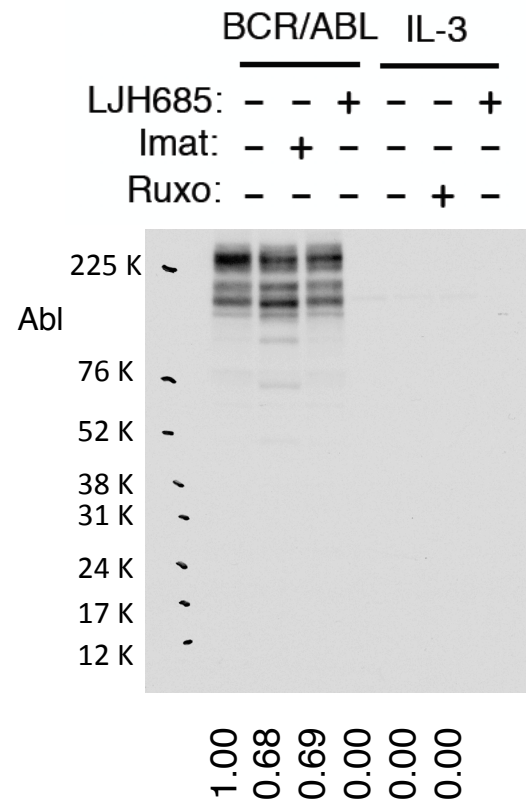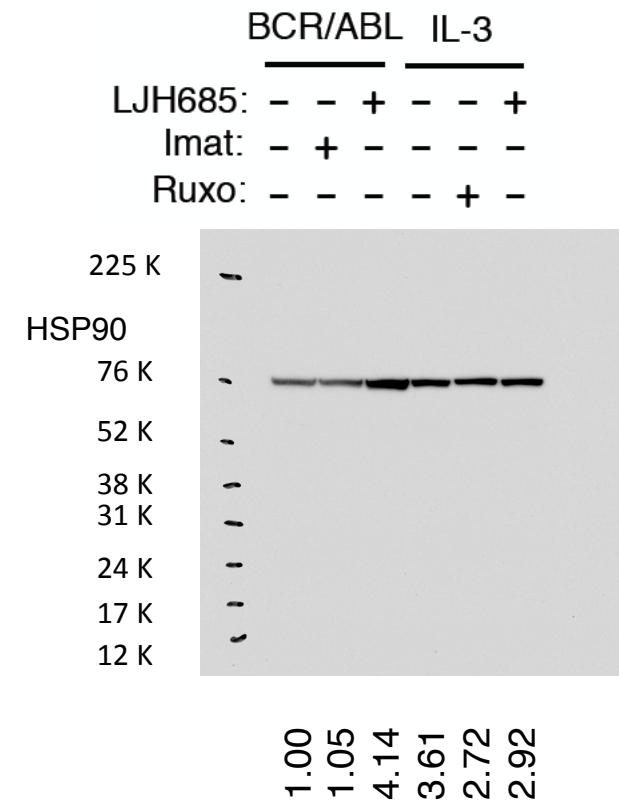

Figure 3A

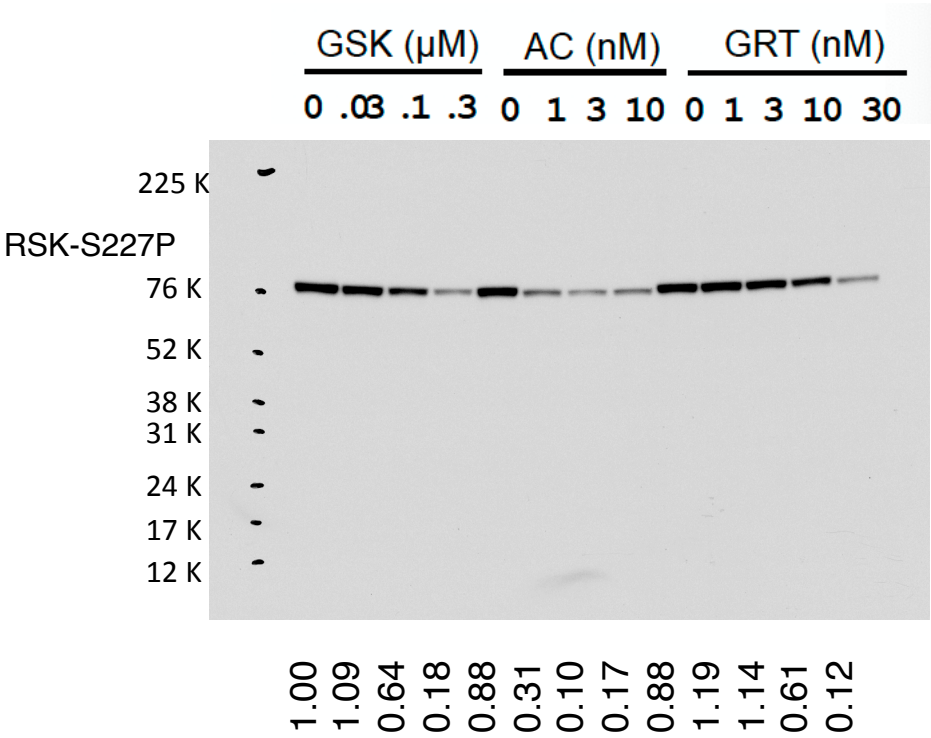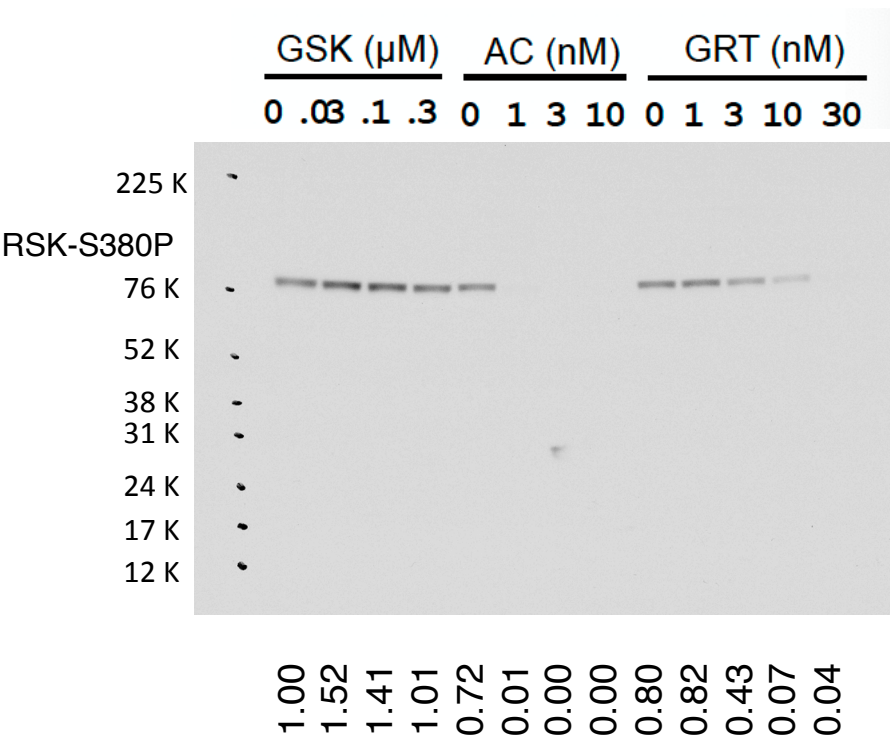

Figure 3A

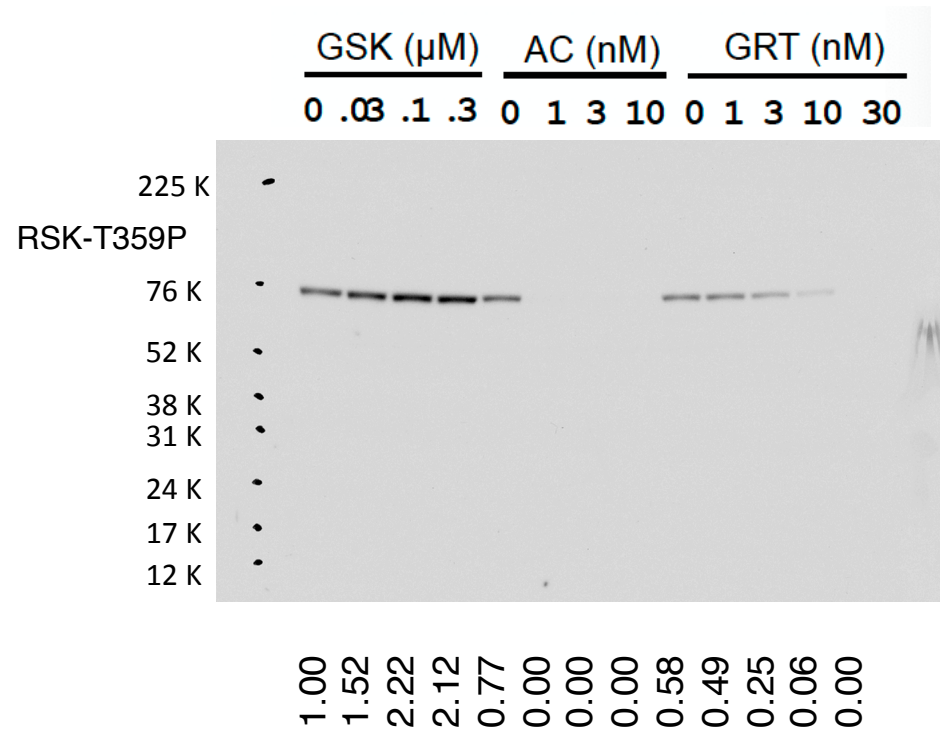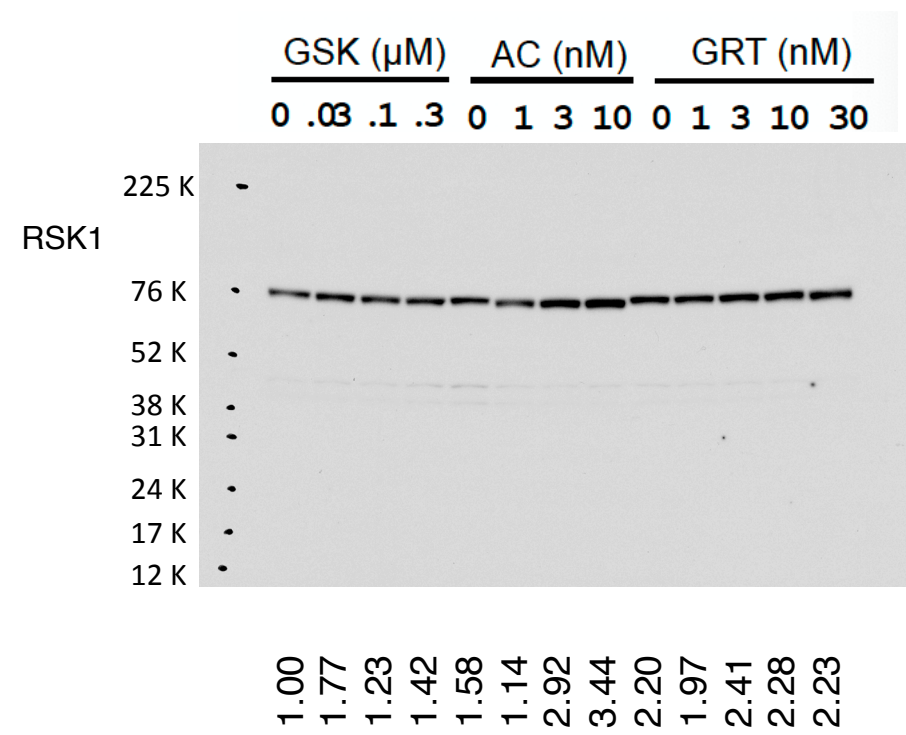

Figure 3A

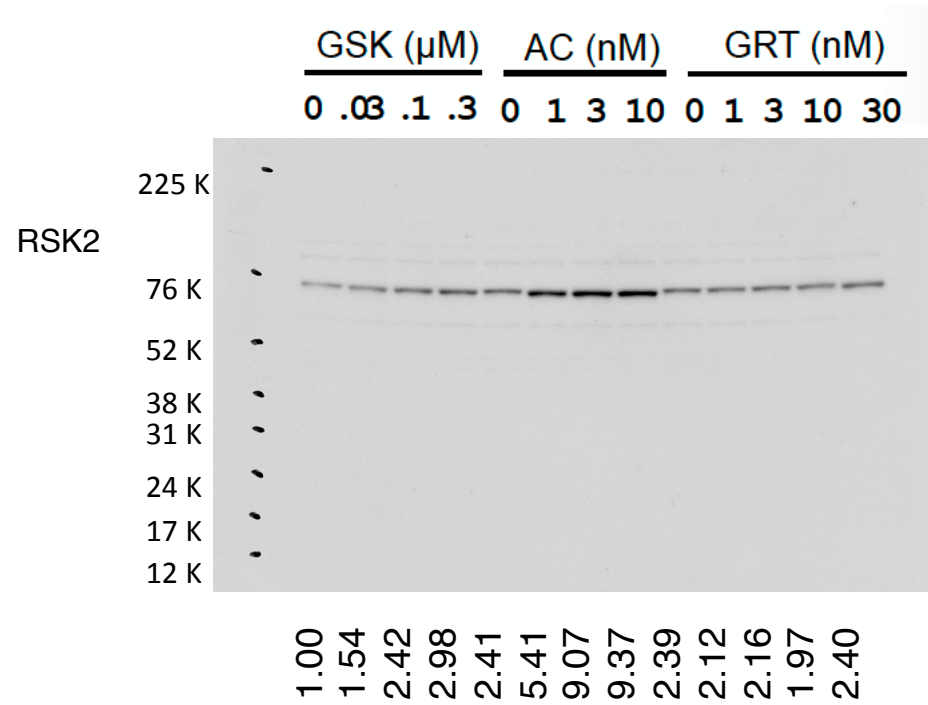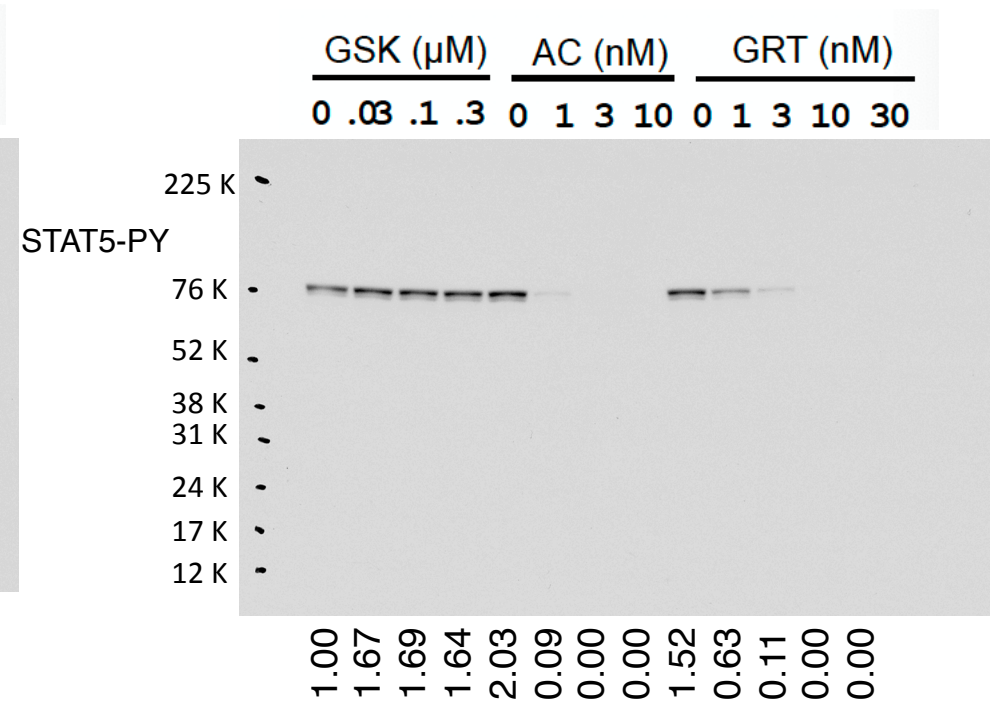

Figure 3A

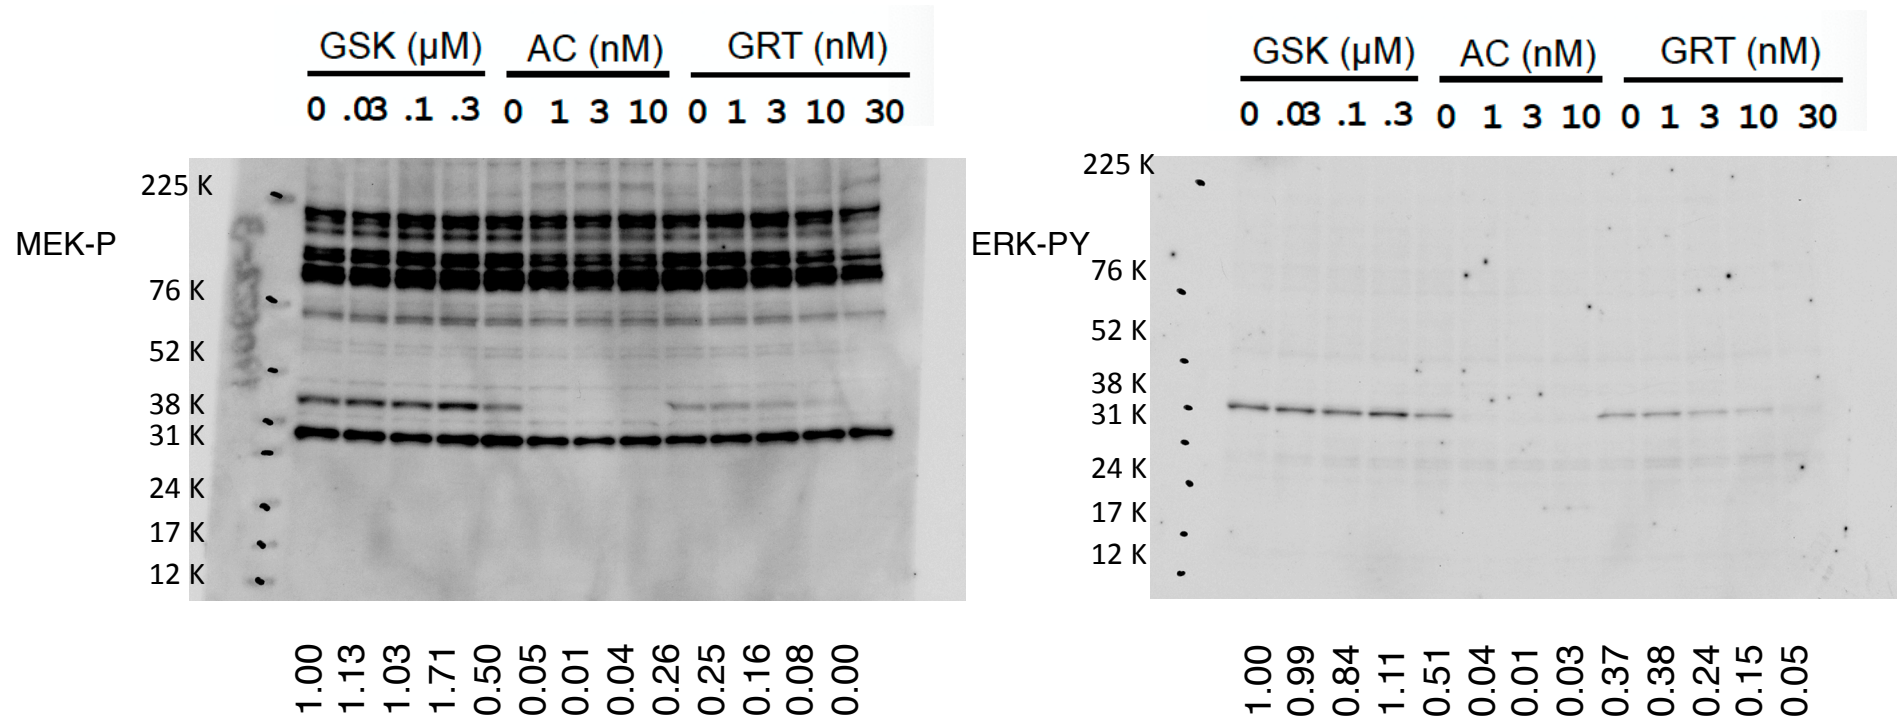

Figure 3A

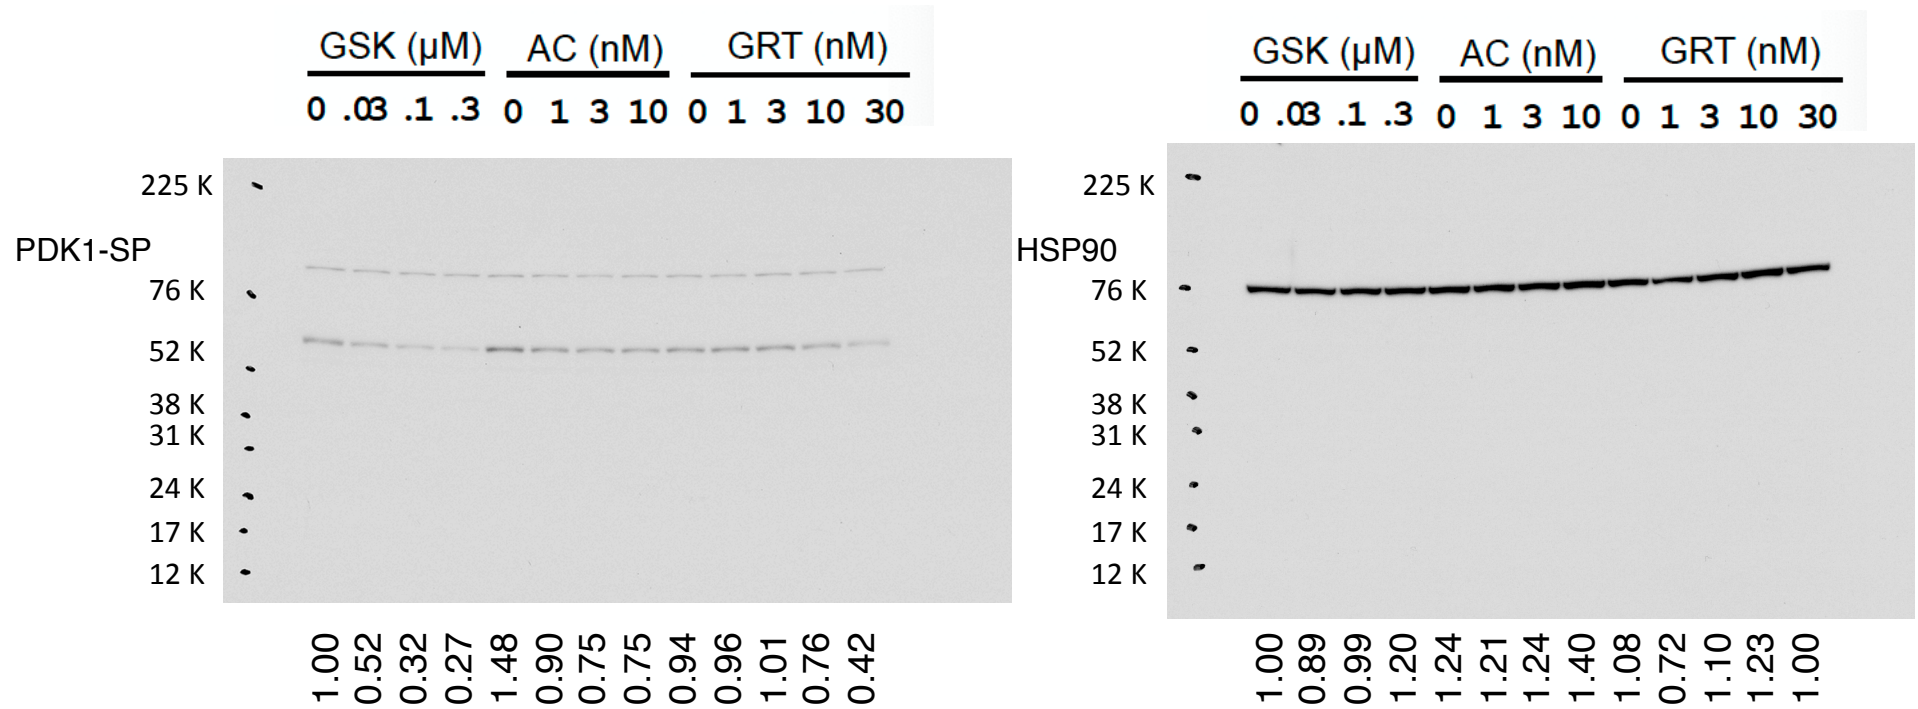

Figure 3B

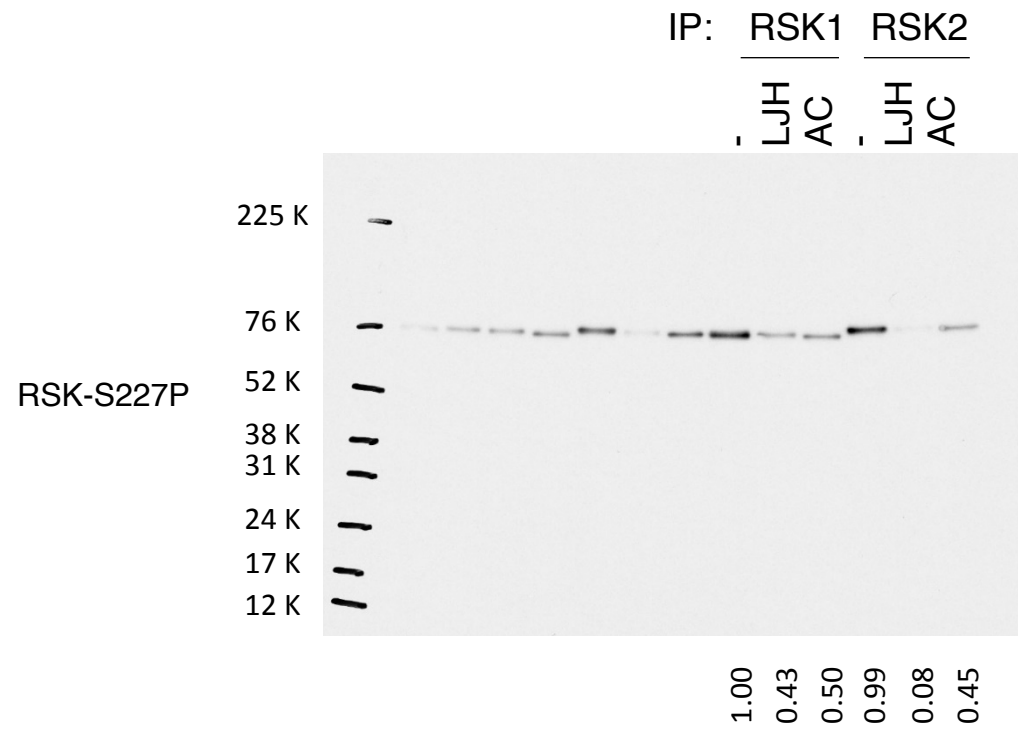

Figure 3B

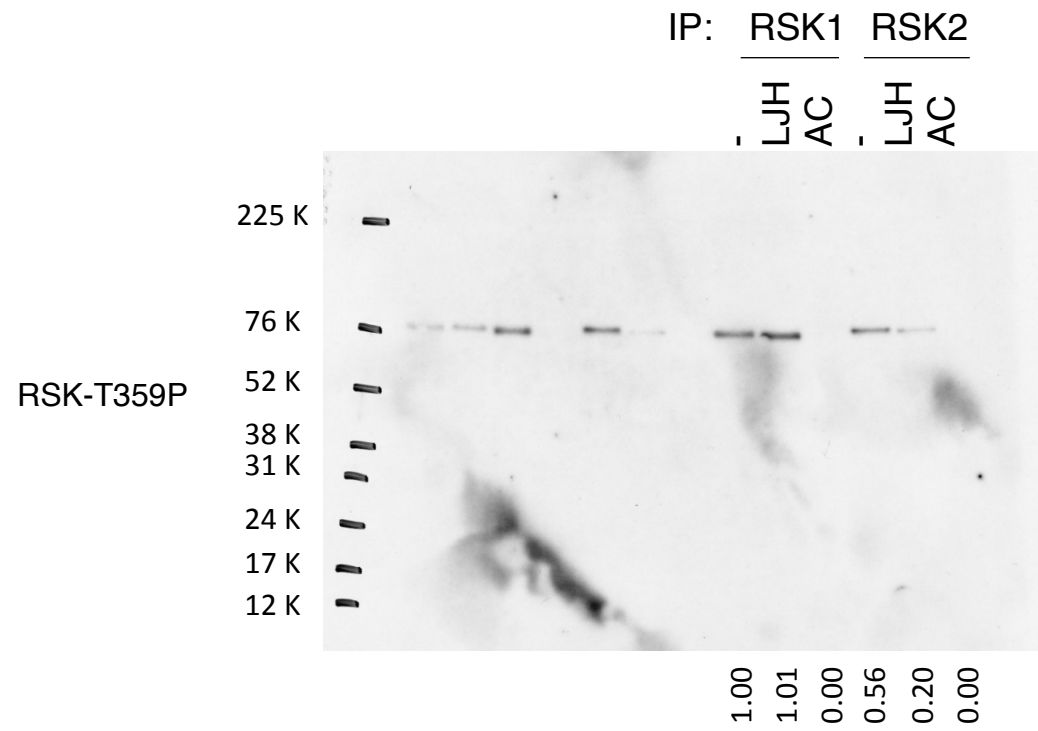

Figure 3B

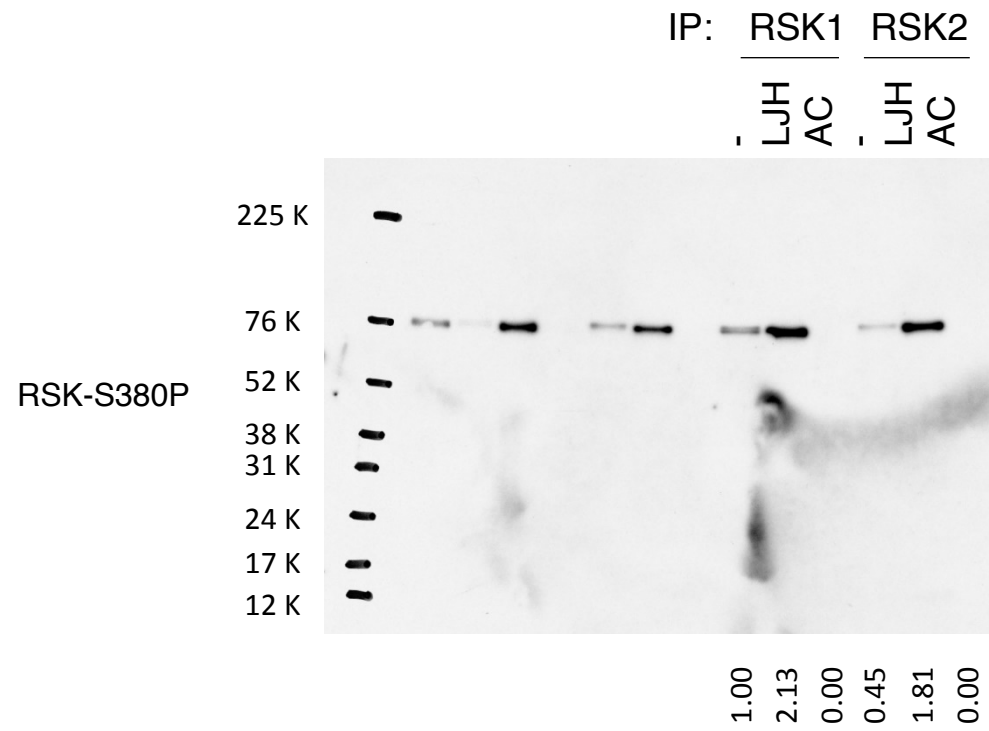

Figure 3B

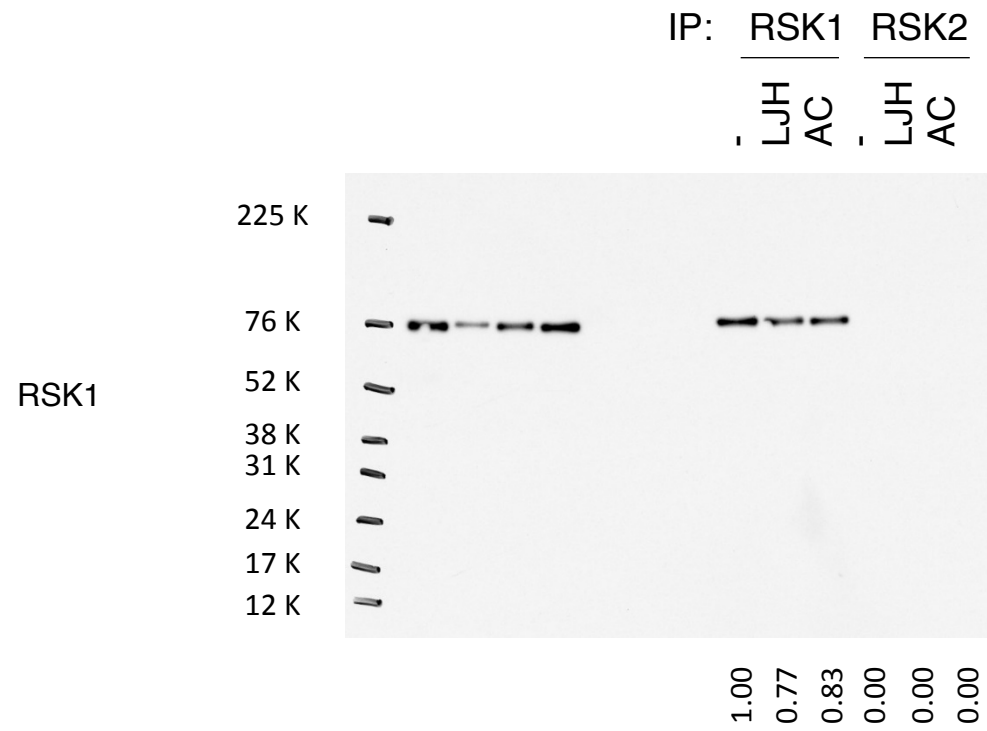

Figure 3B

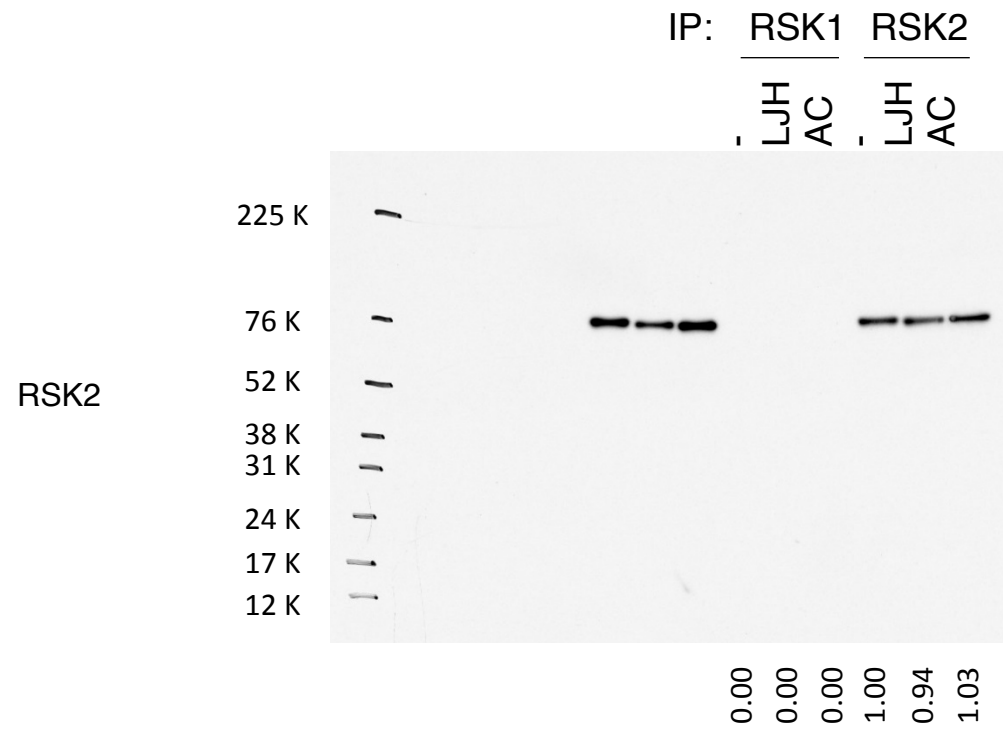

Figure 3C

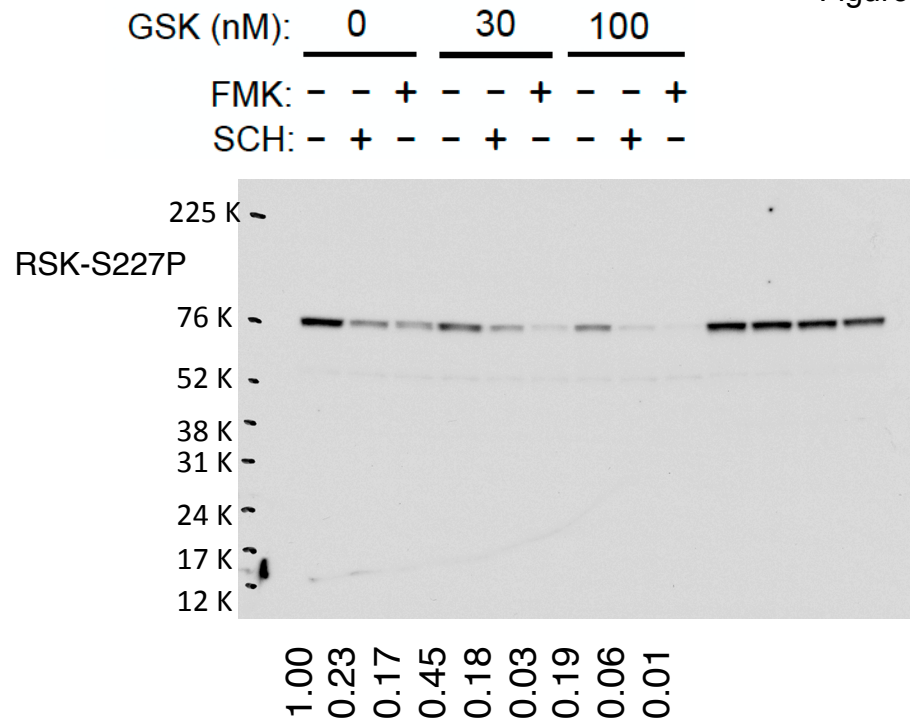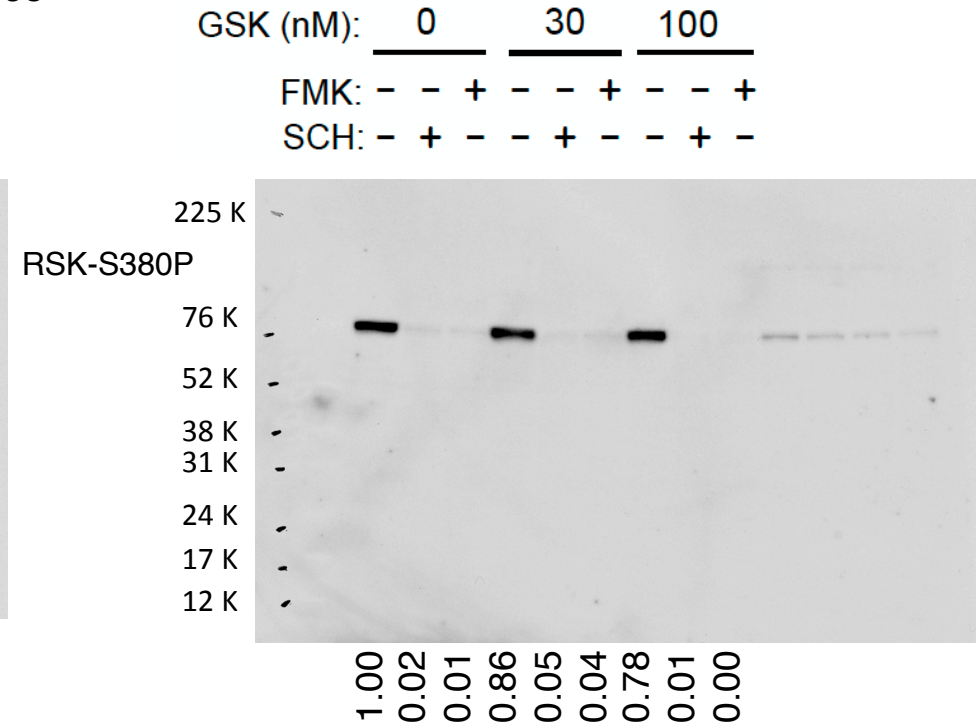

Figure 3C

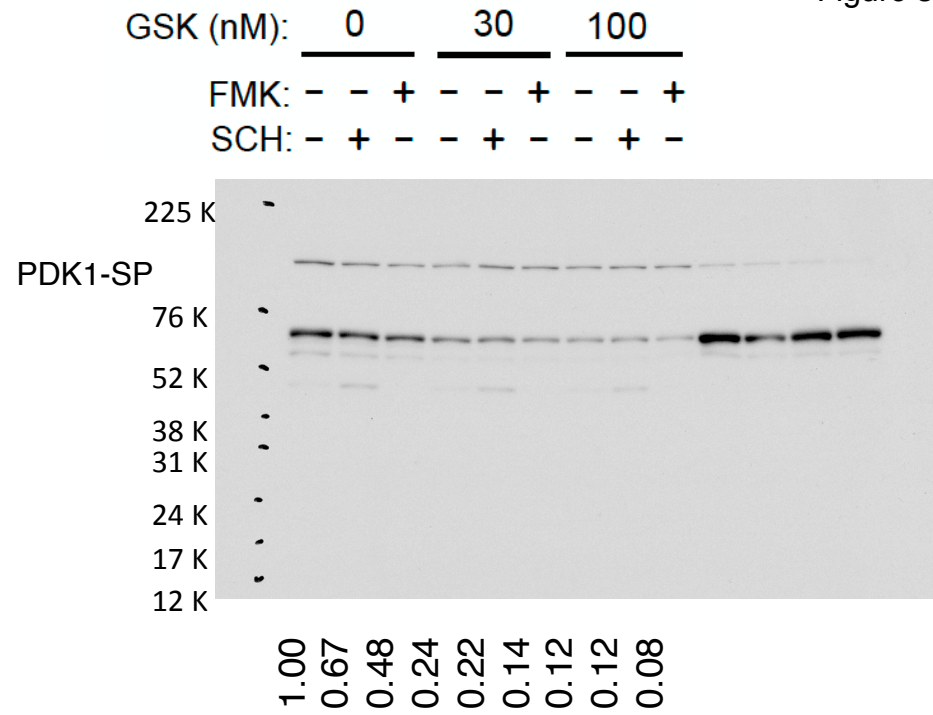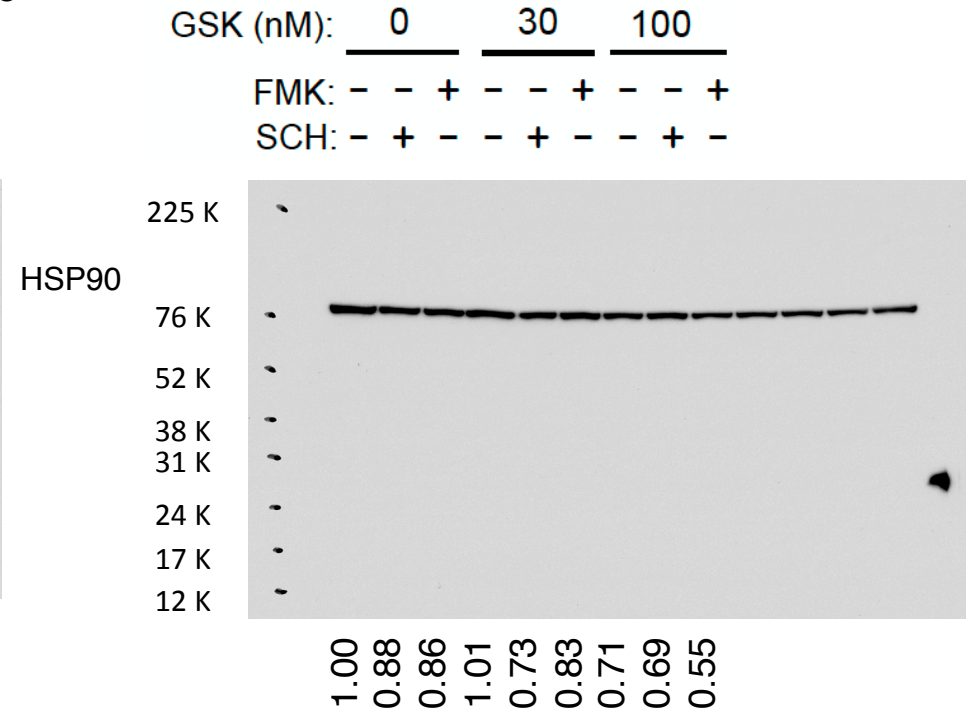

Figure 3D

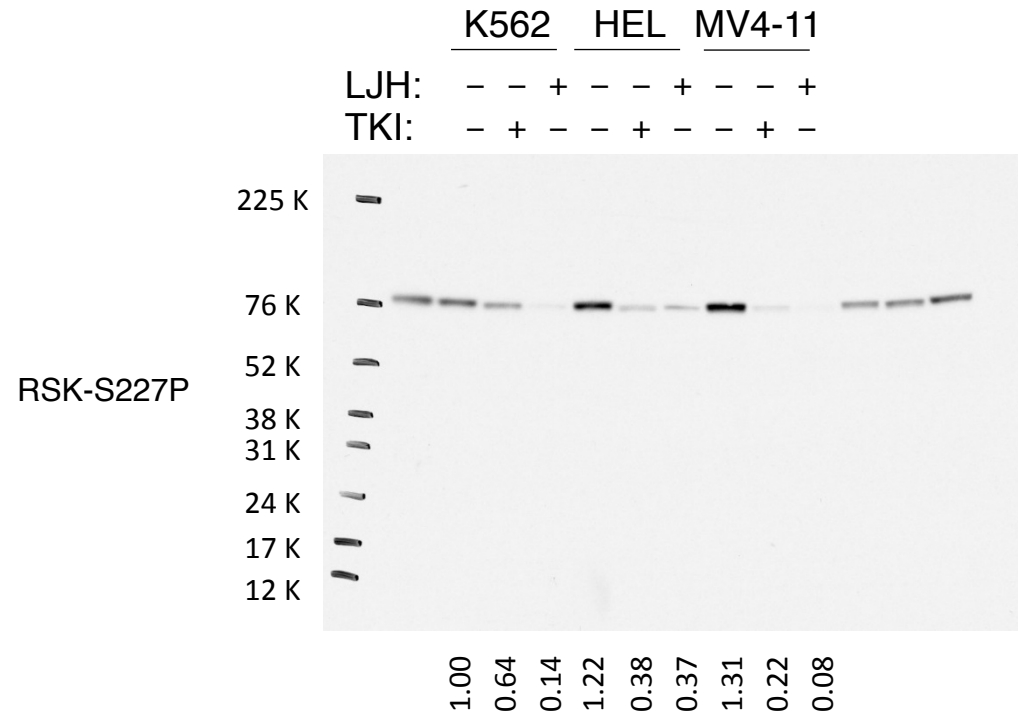

Figure 3D

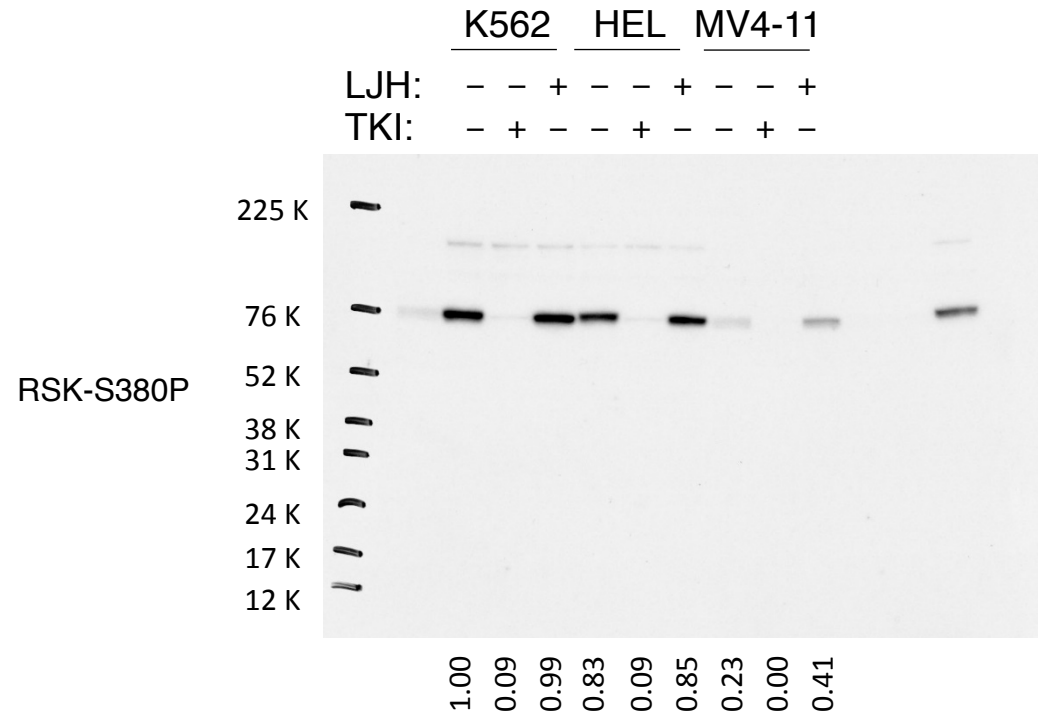

Figure 3D

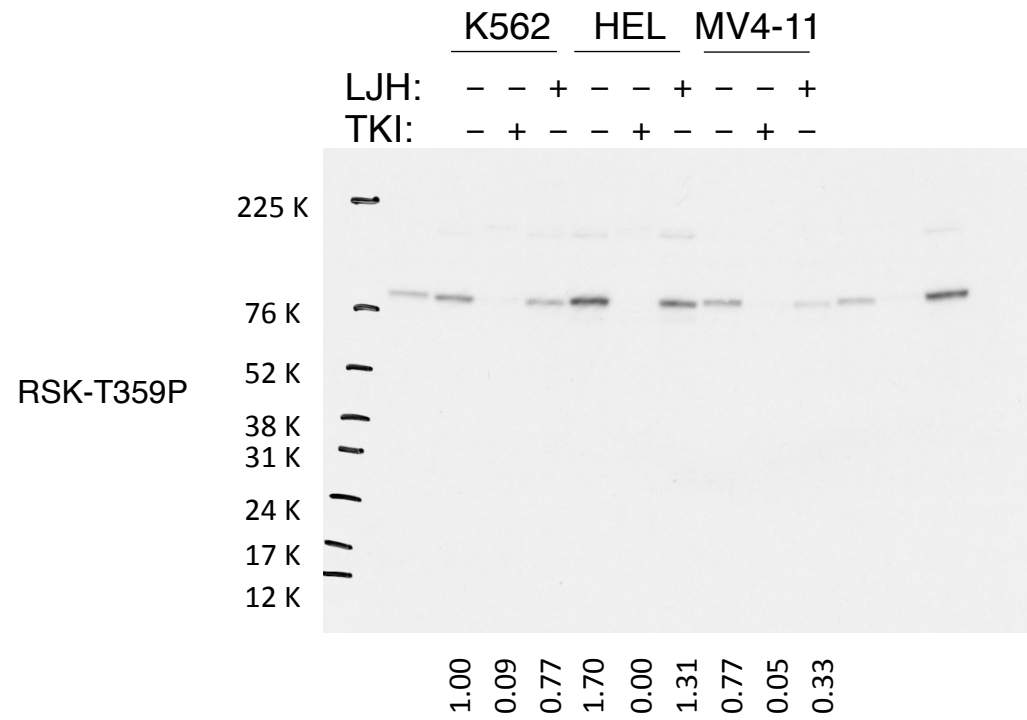

Figure 3D

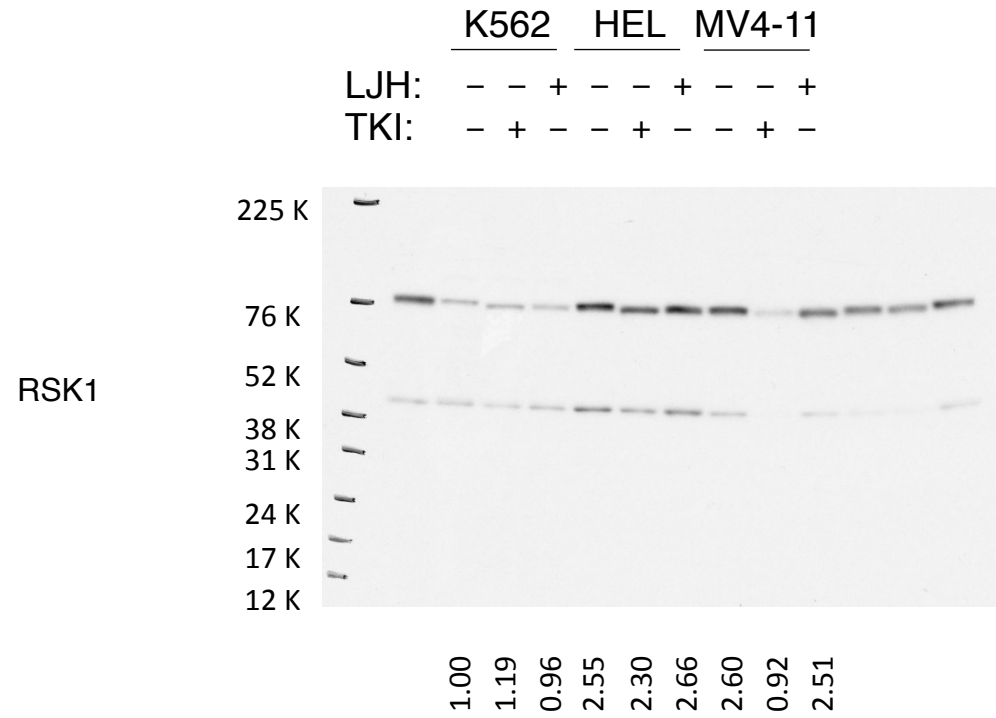

Figure 3D

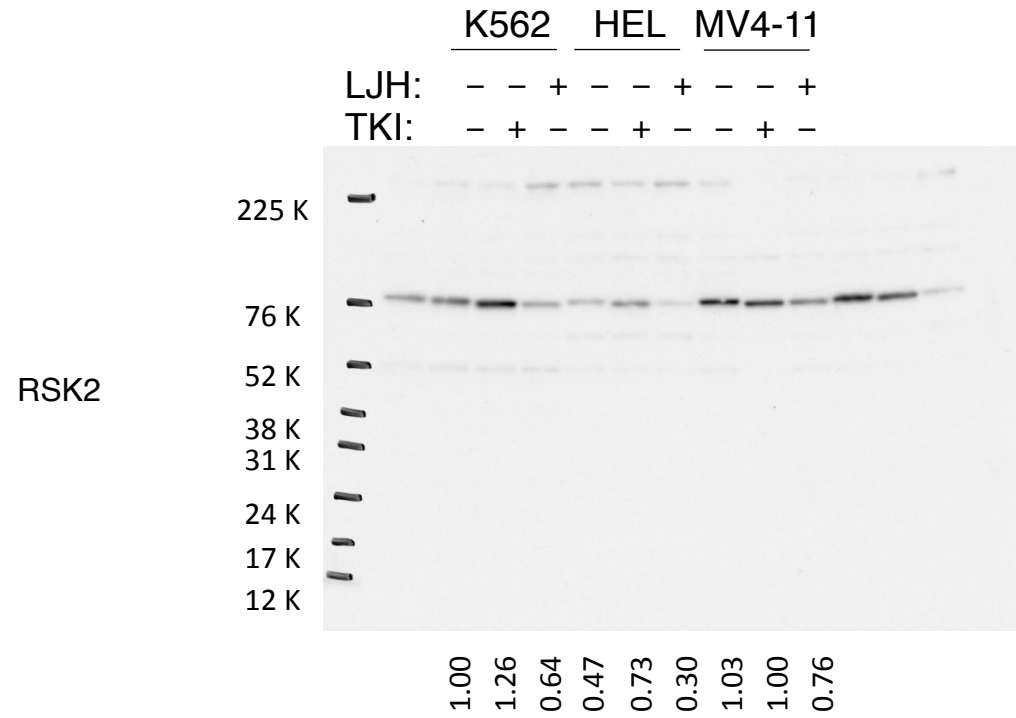

Figure 3D

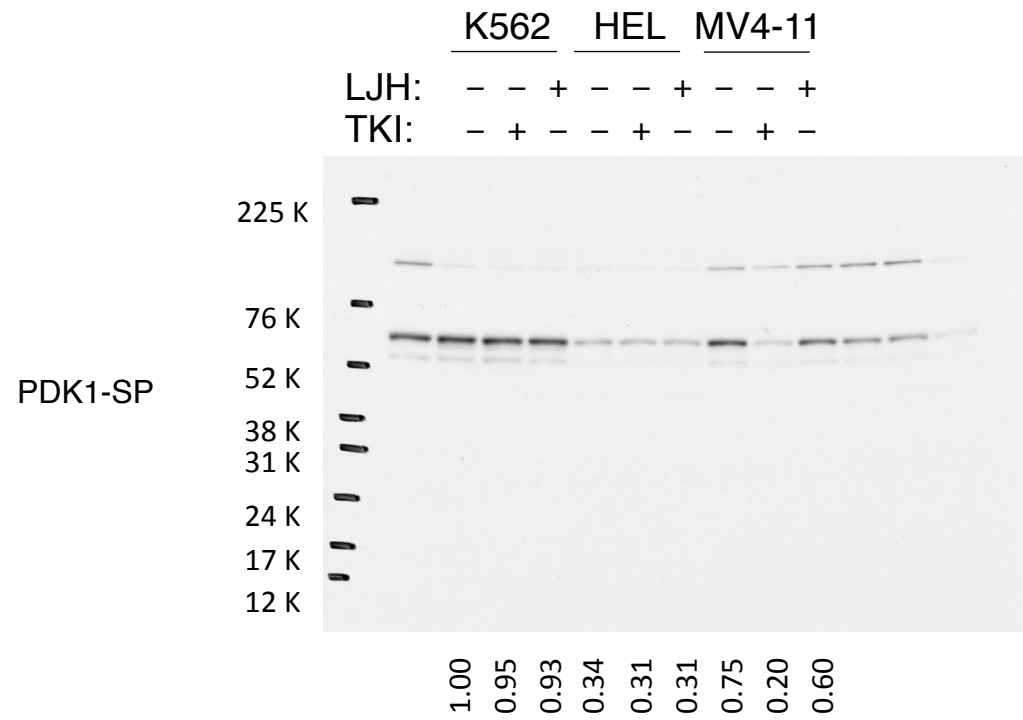

Figure 3D

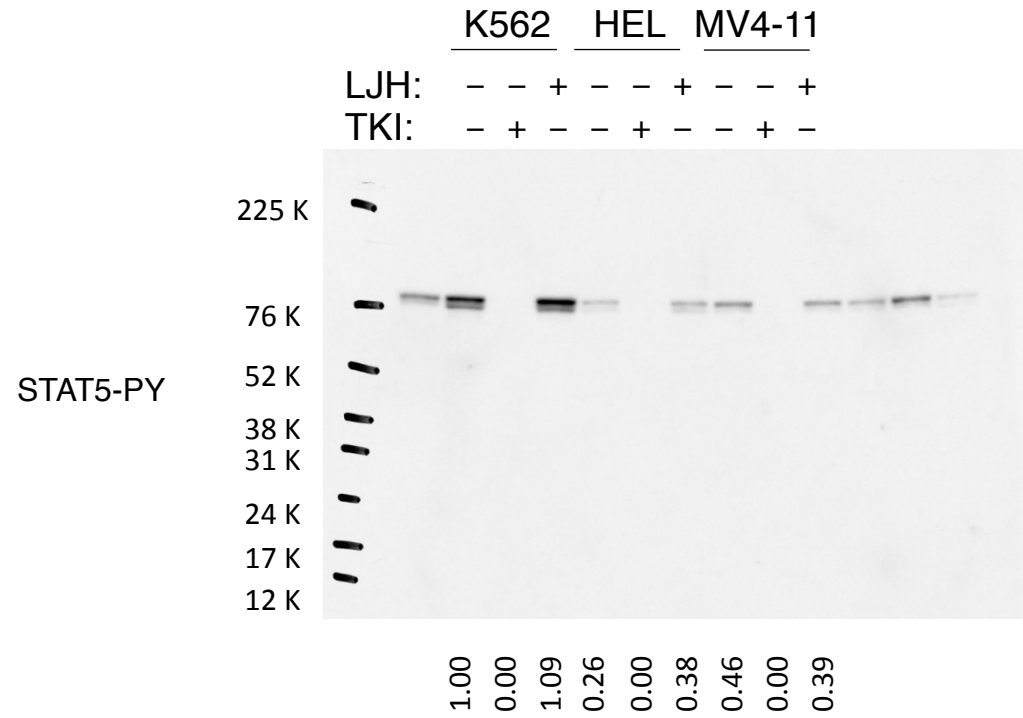

Figure 3D

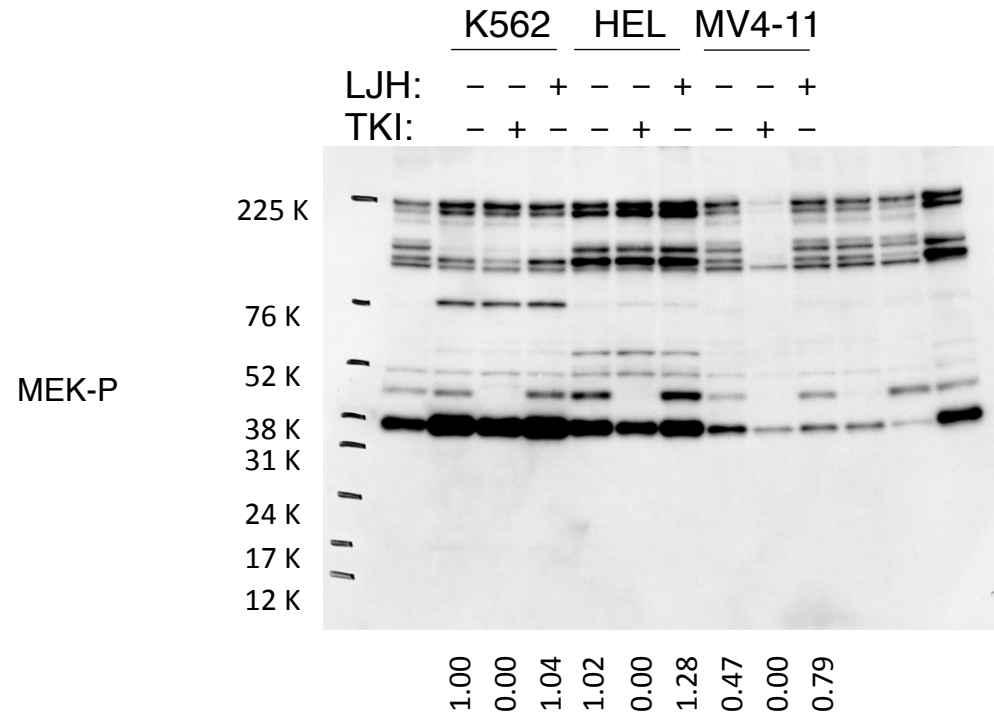

Figure 3D

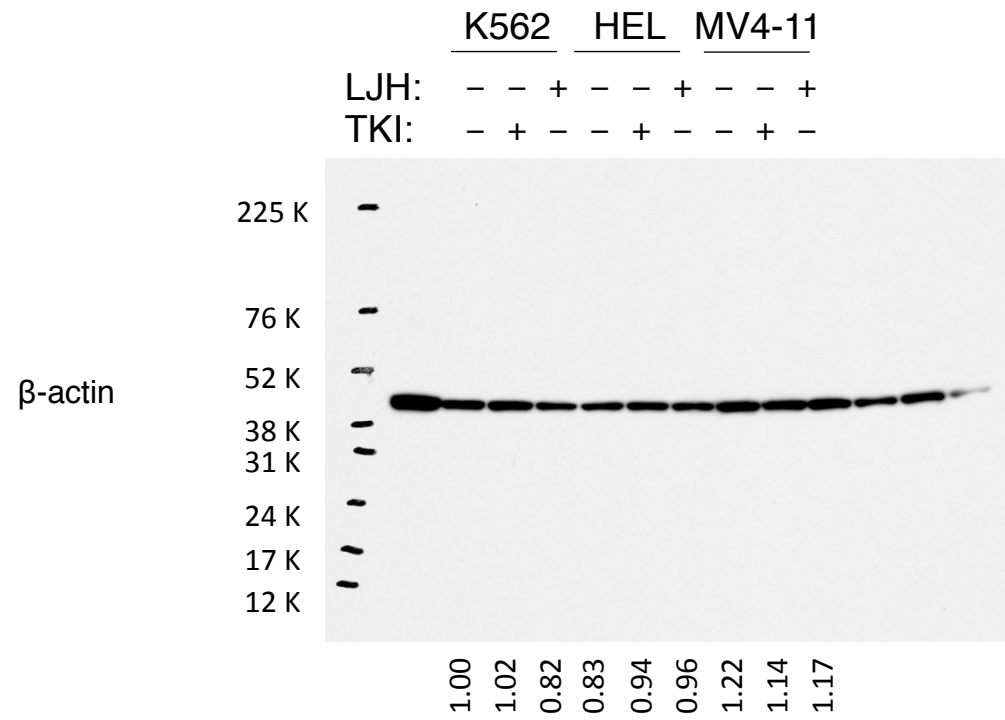

Figure 3E

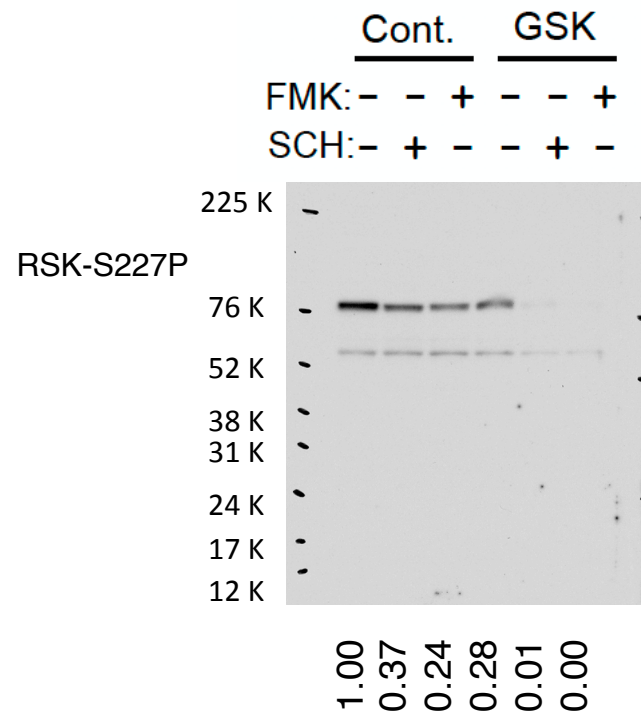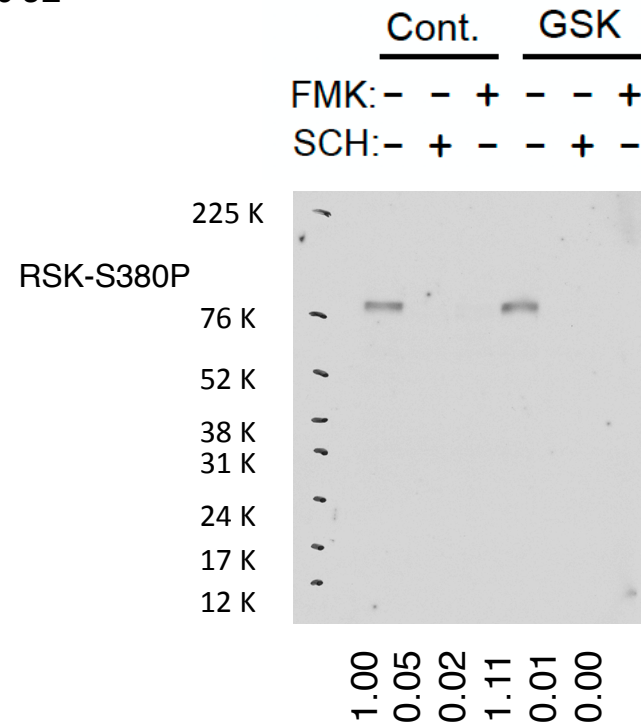

Figure 3E

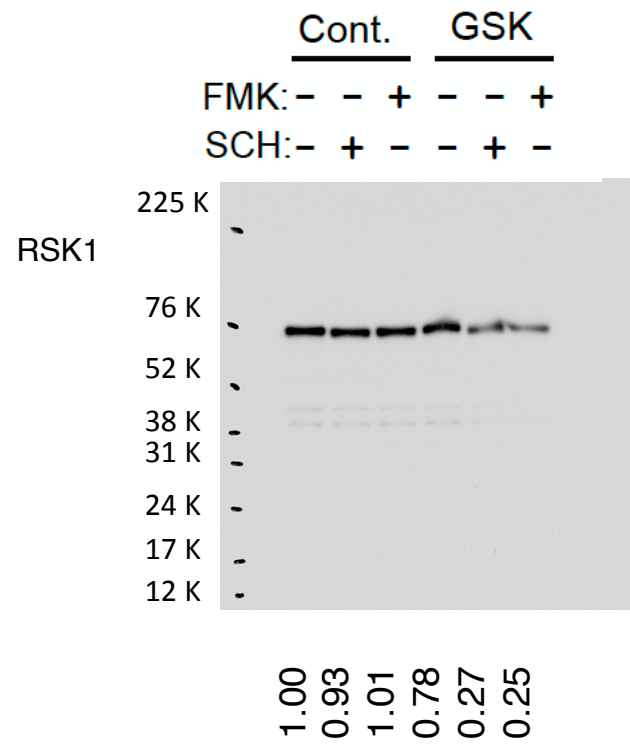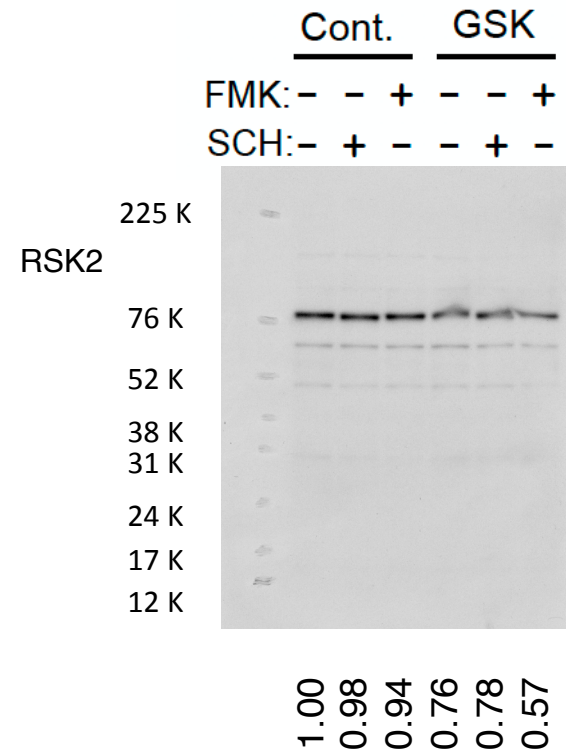

Figure 3E

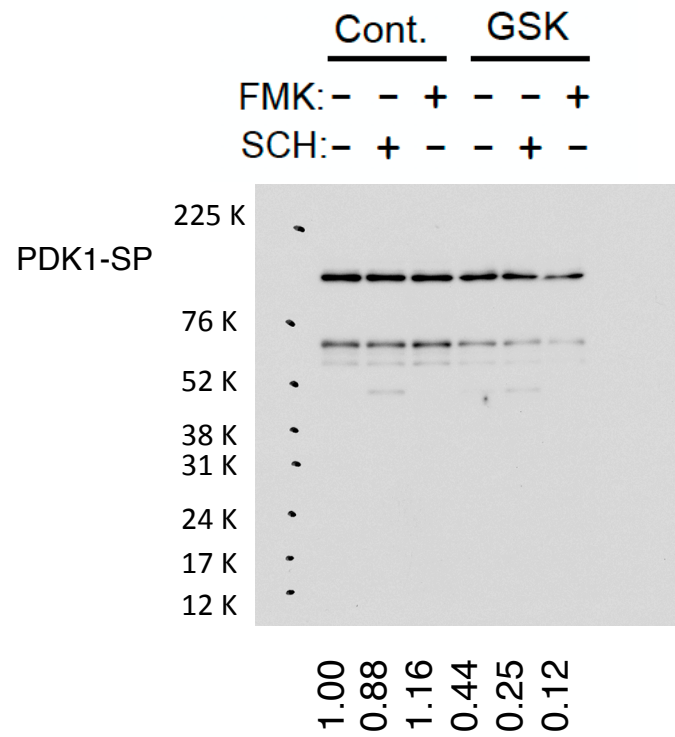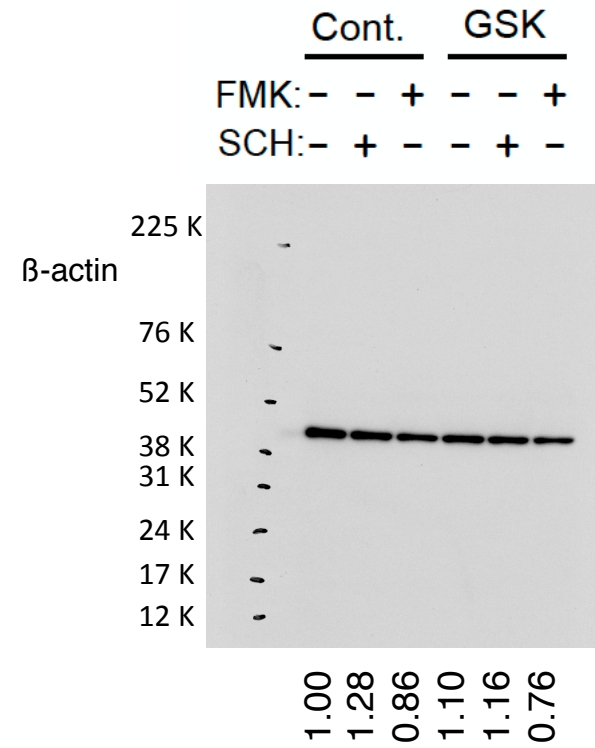

Figure 3F

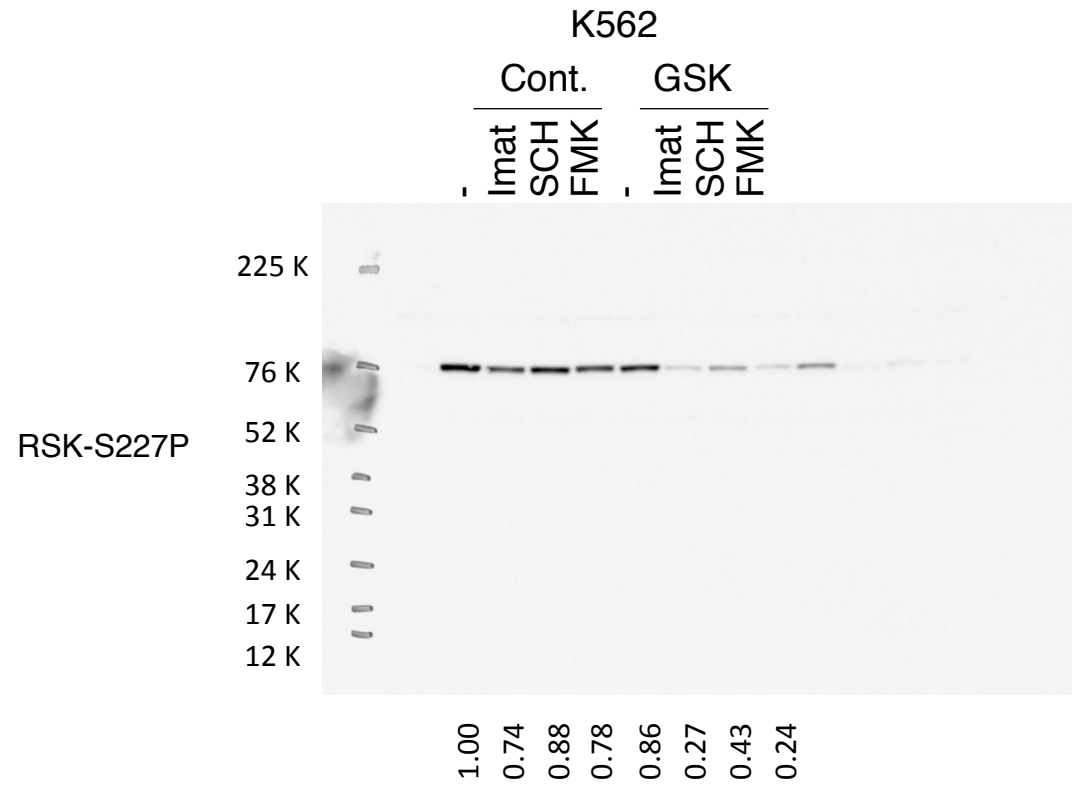

Figure 3F

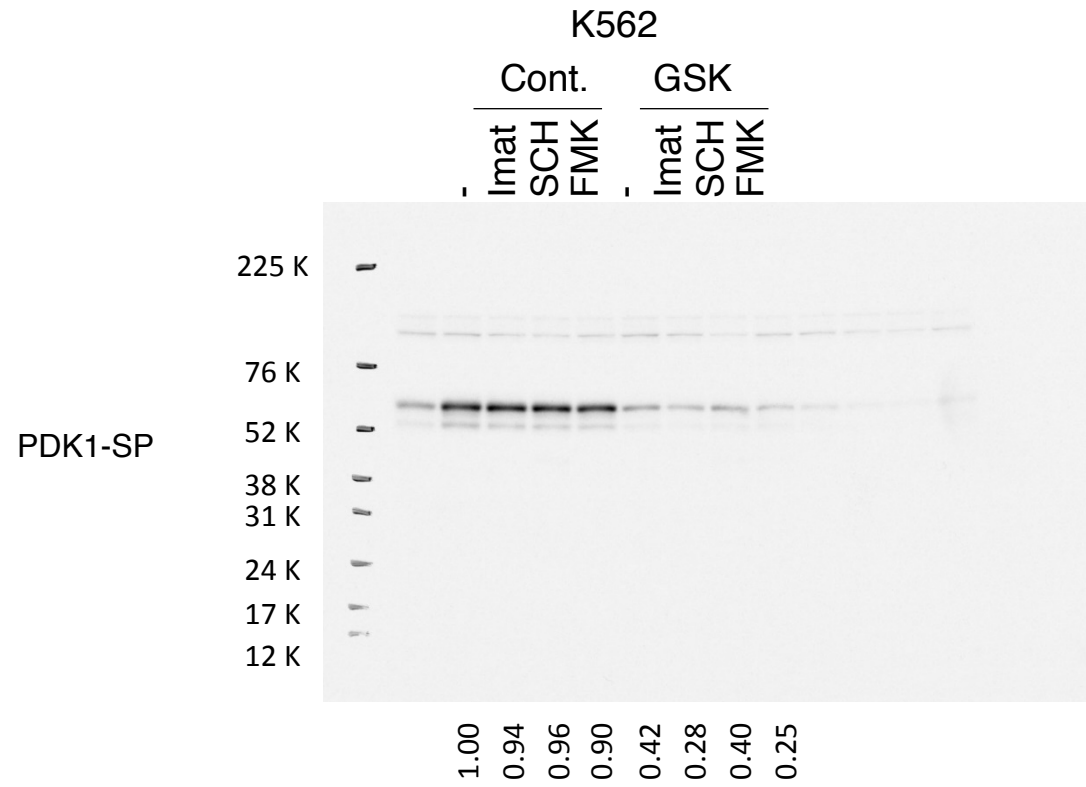

Figure 3F

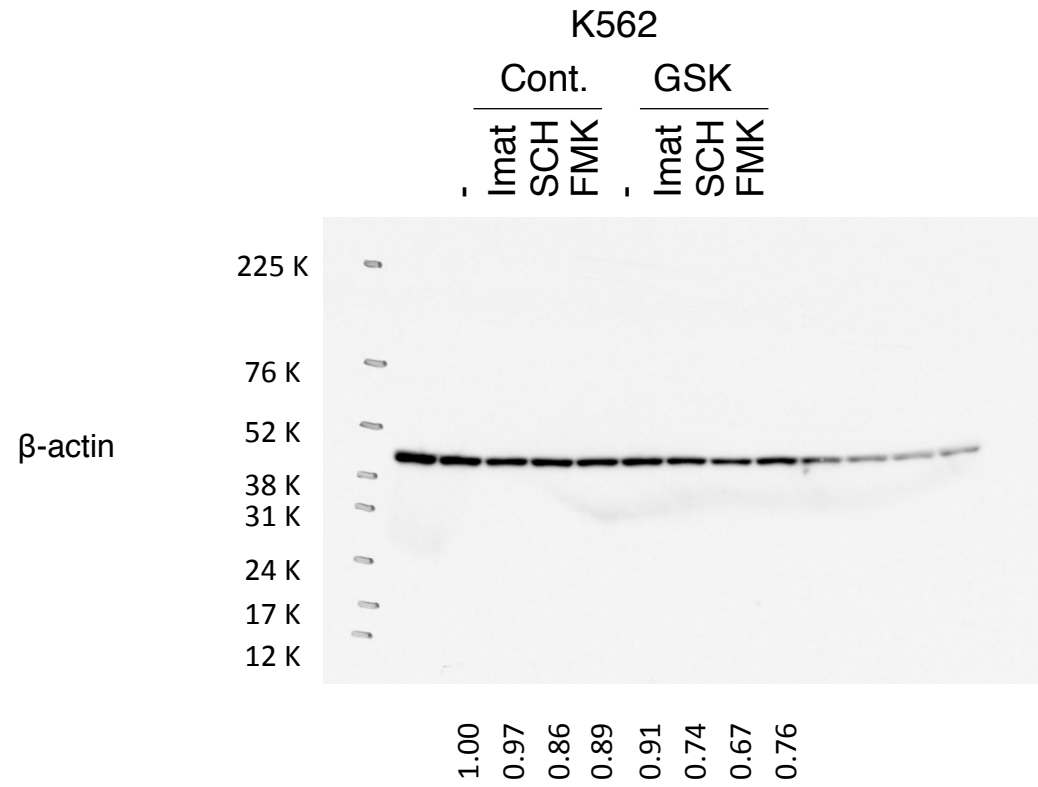

Figure 3G

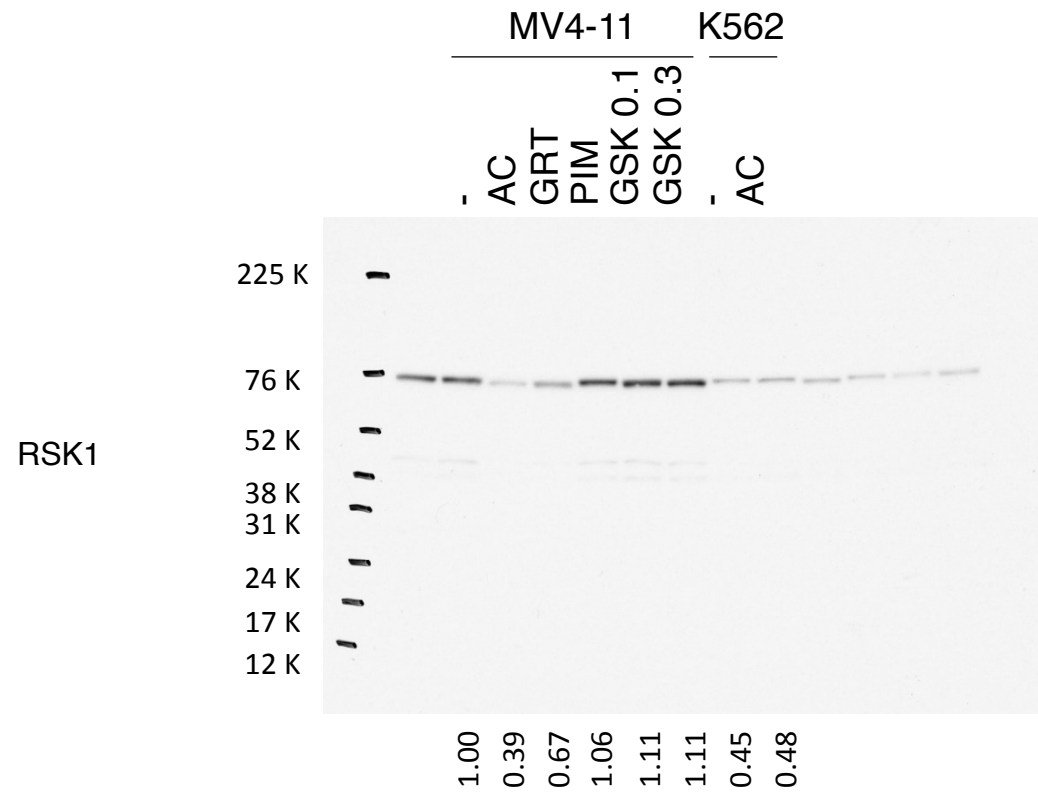

Figure 3G

MV4-11

K562

AC  
GRT  
PIM  
GSK 0.1  
GSK 0.3

AC

225 K

76 K

52 K

38 K

31 K

24 K

17 K

12 K

RSK2

1.00

1.05

1.27

1.27

1.30

1.30

1.27

1.26

Figure 3G

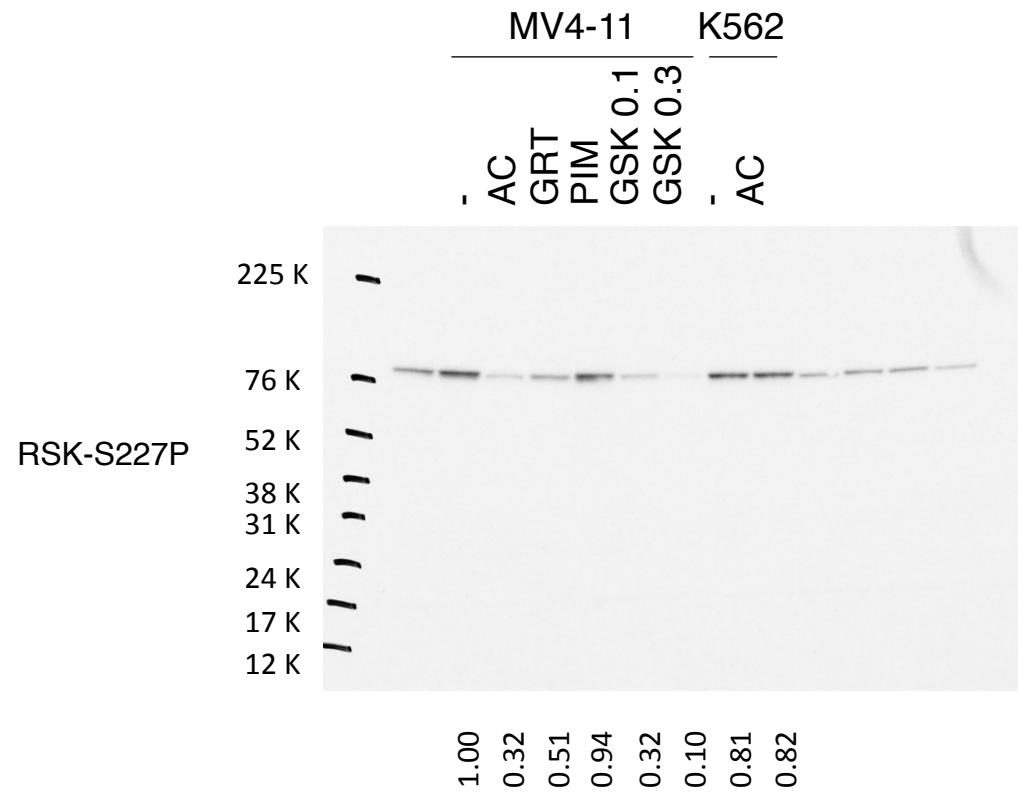

Figure 3G

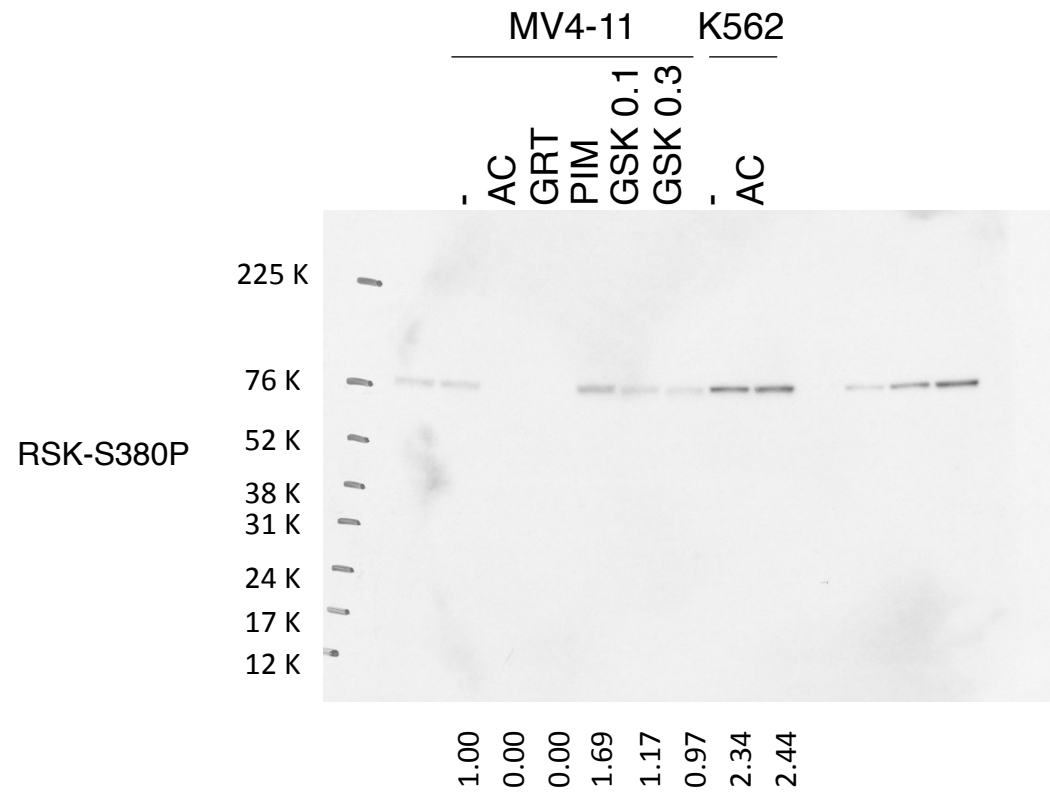

Figure 3G

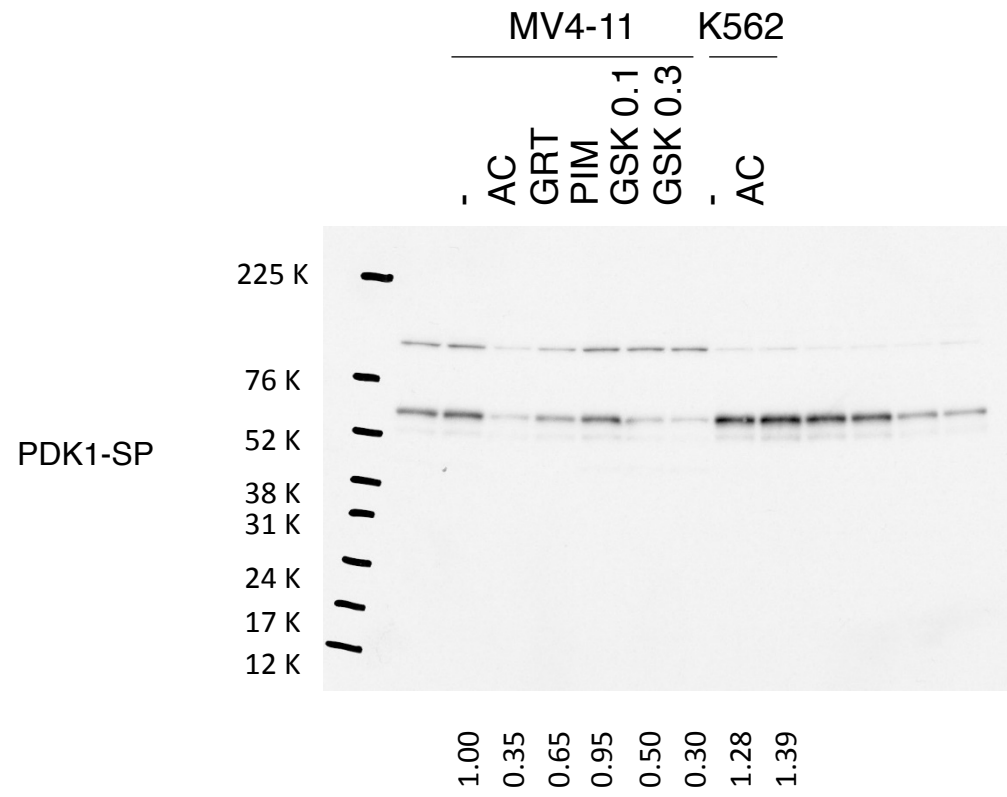

Figure 3G

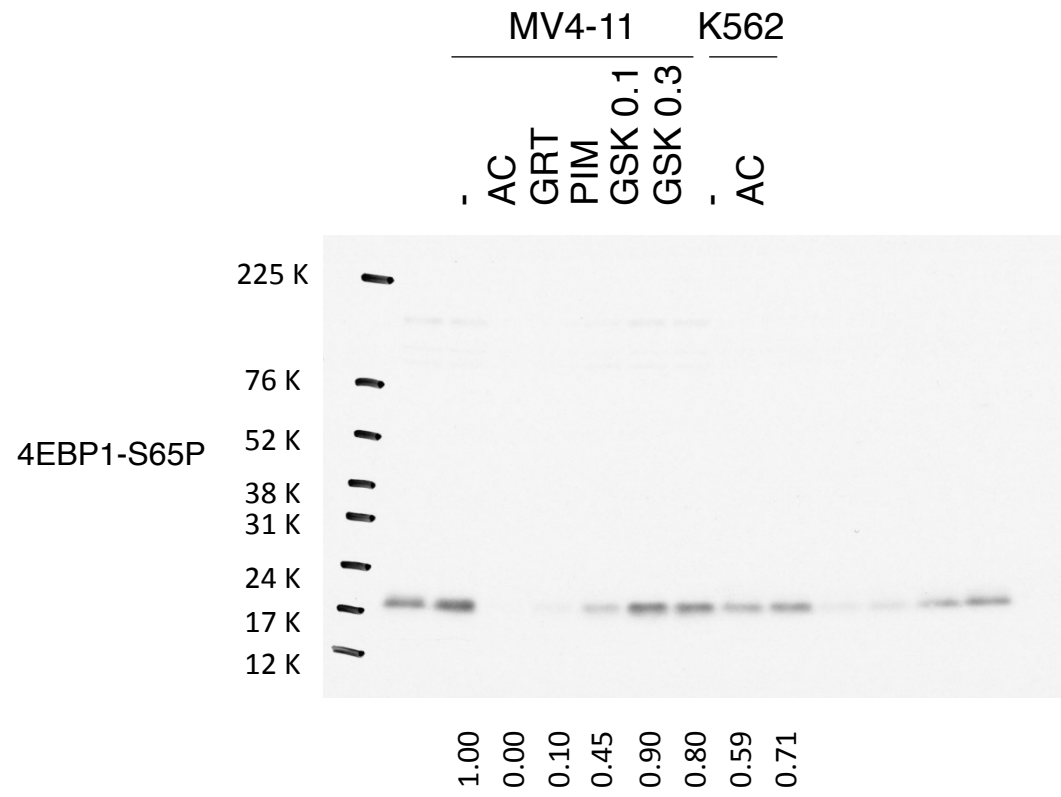

Figure 3G

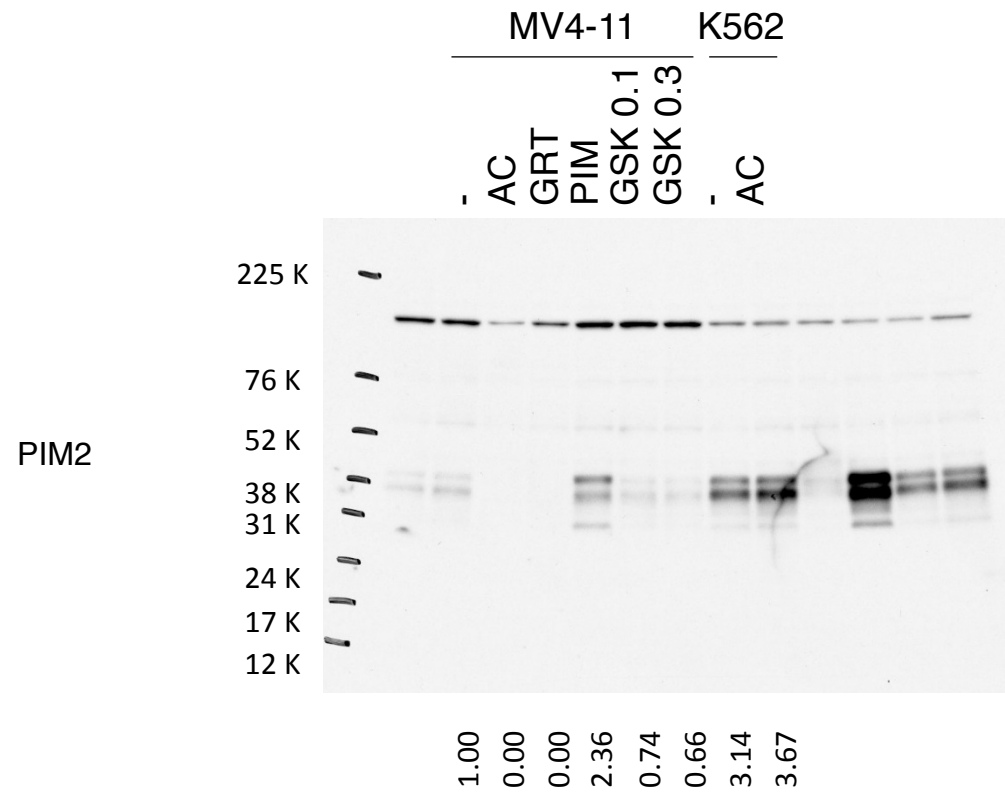

Figure 3G

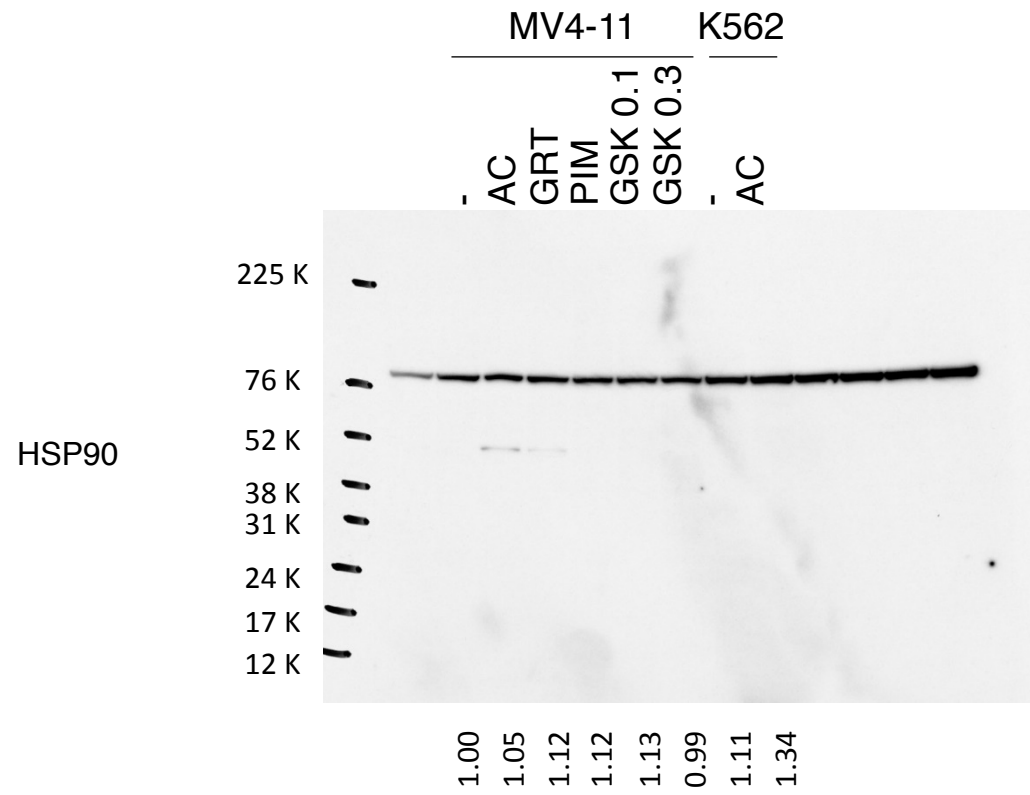

Figure 3J

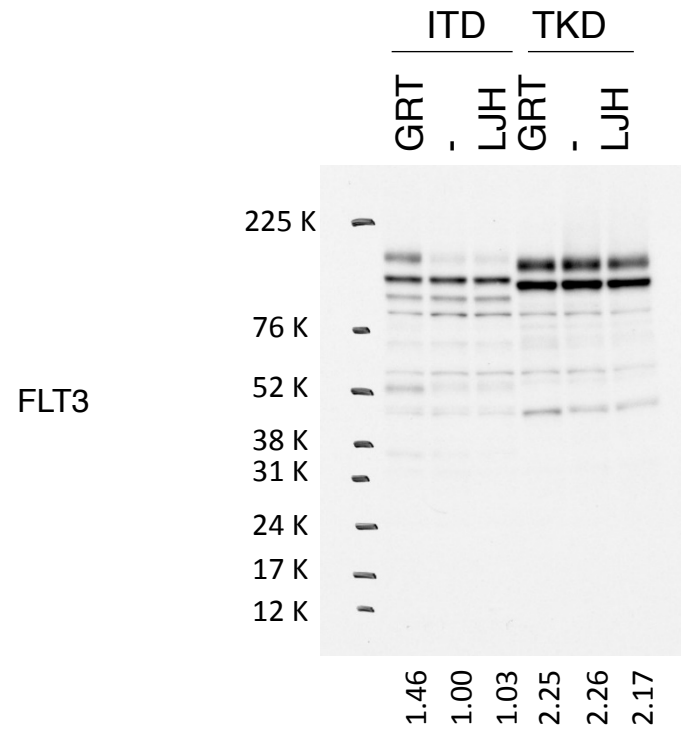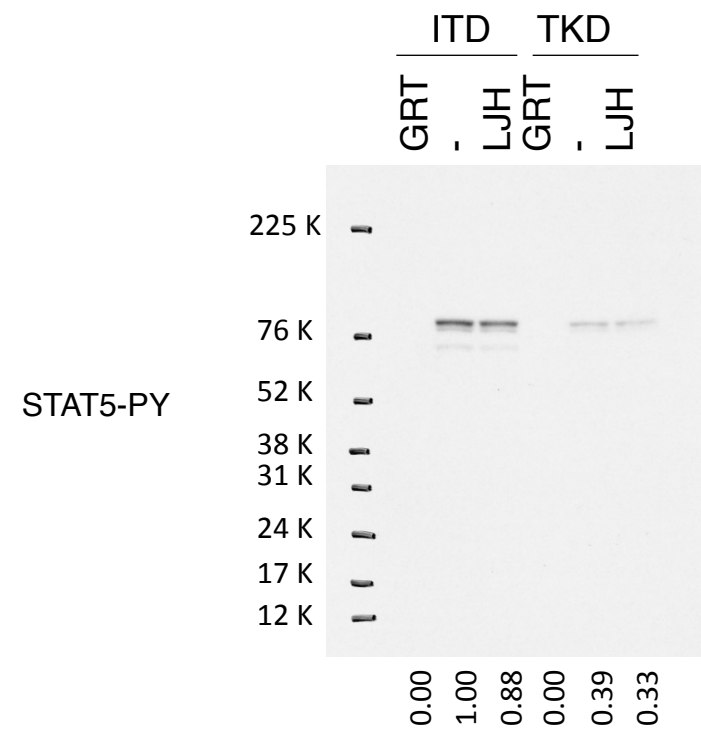

Figure 3J

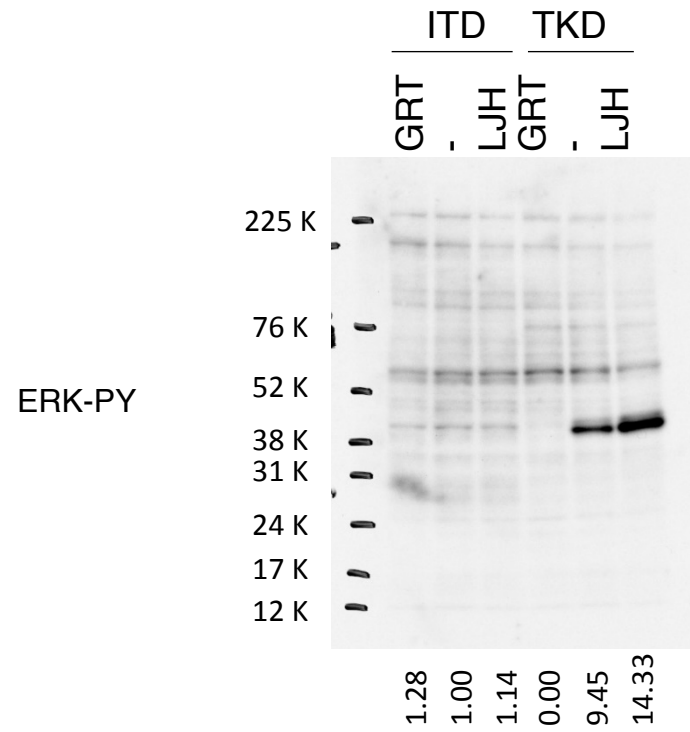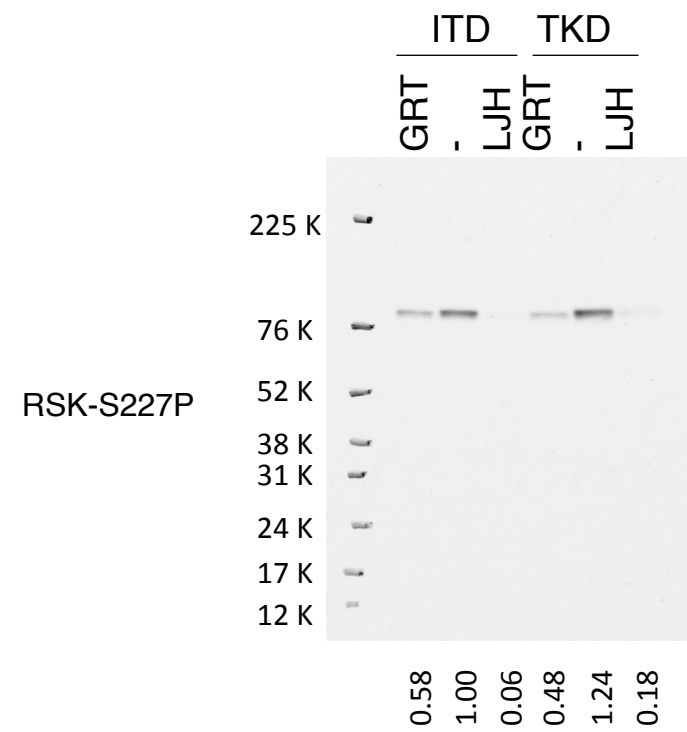

Figure 3J

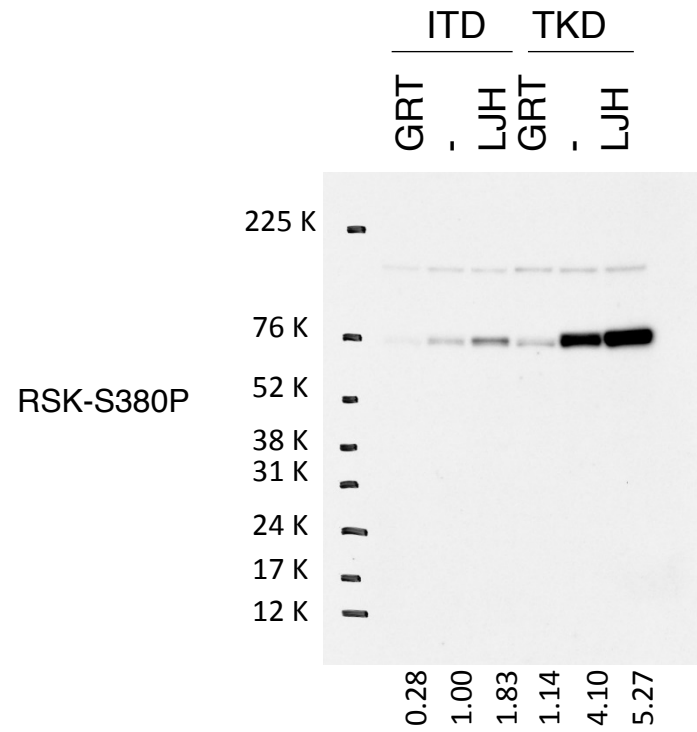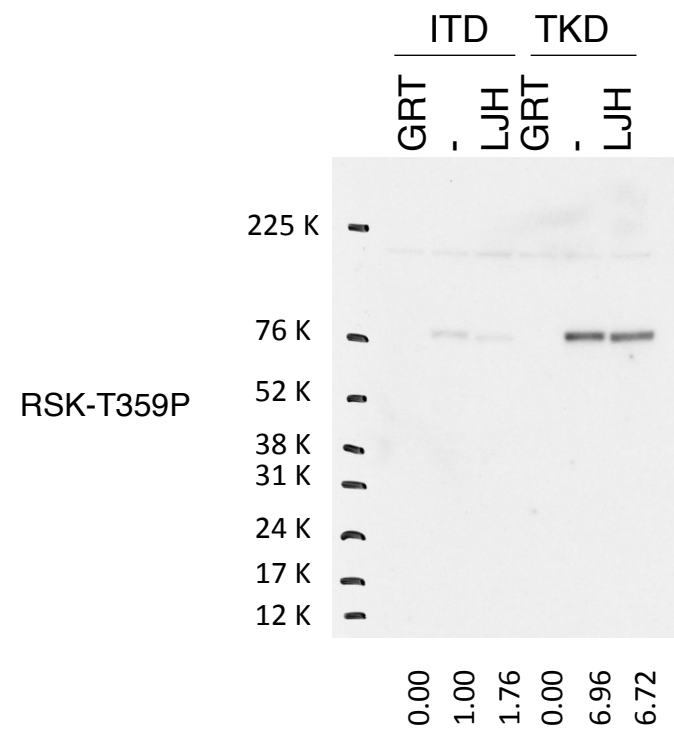

Figure 3J

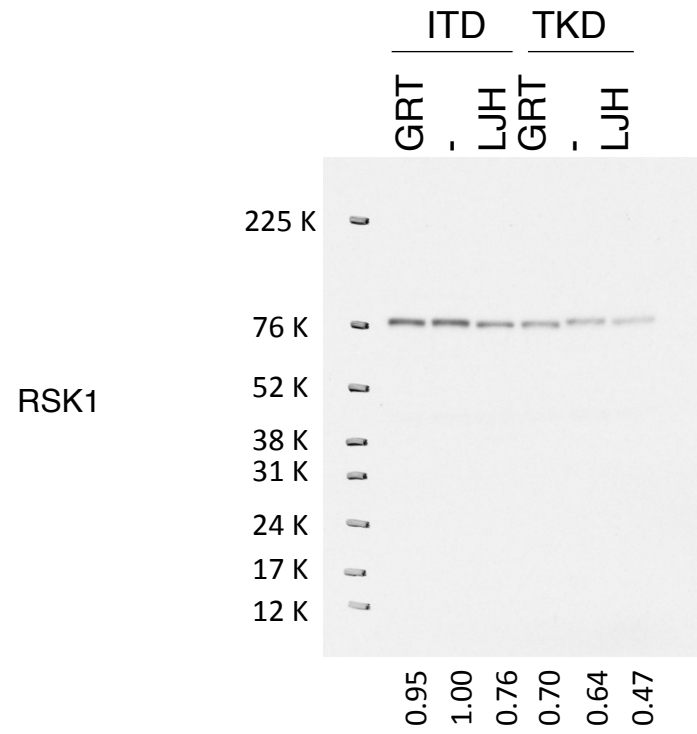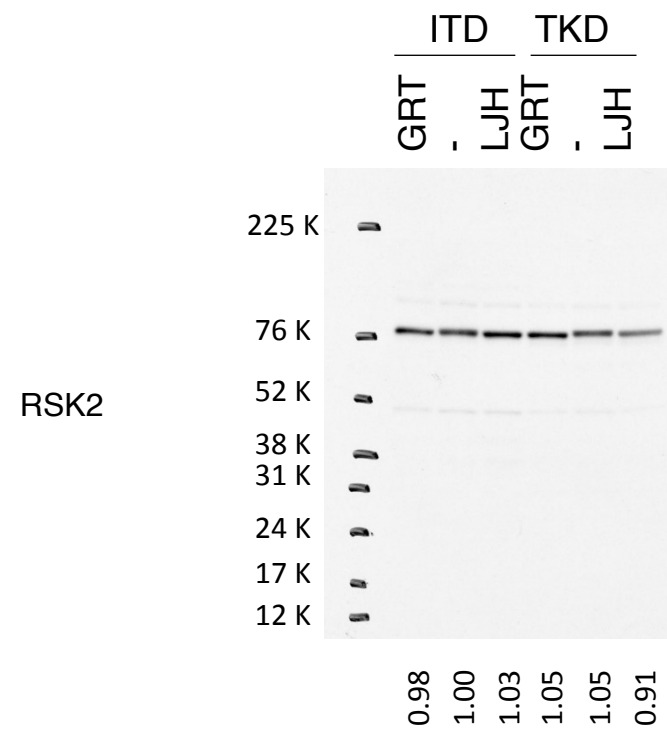

Figure 3J

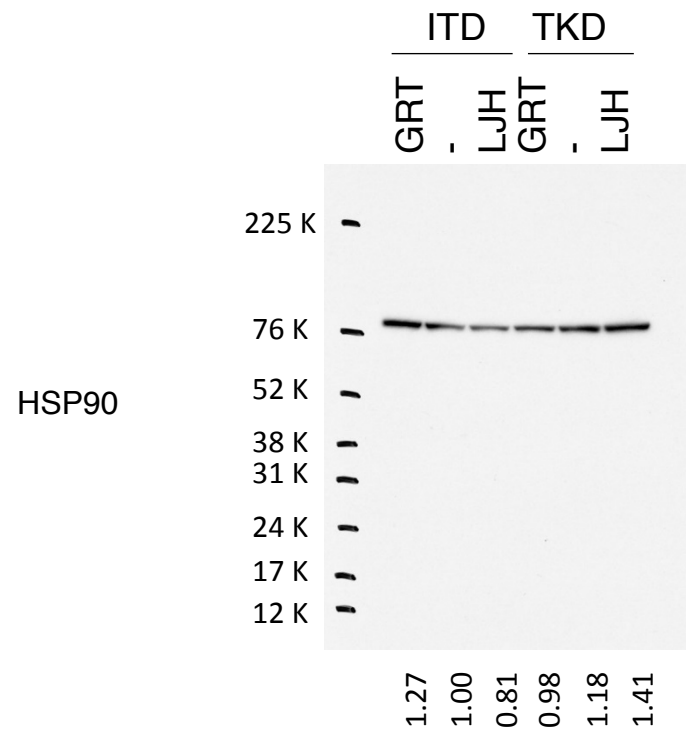

Figure 3H

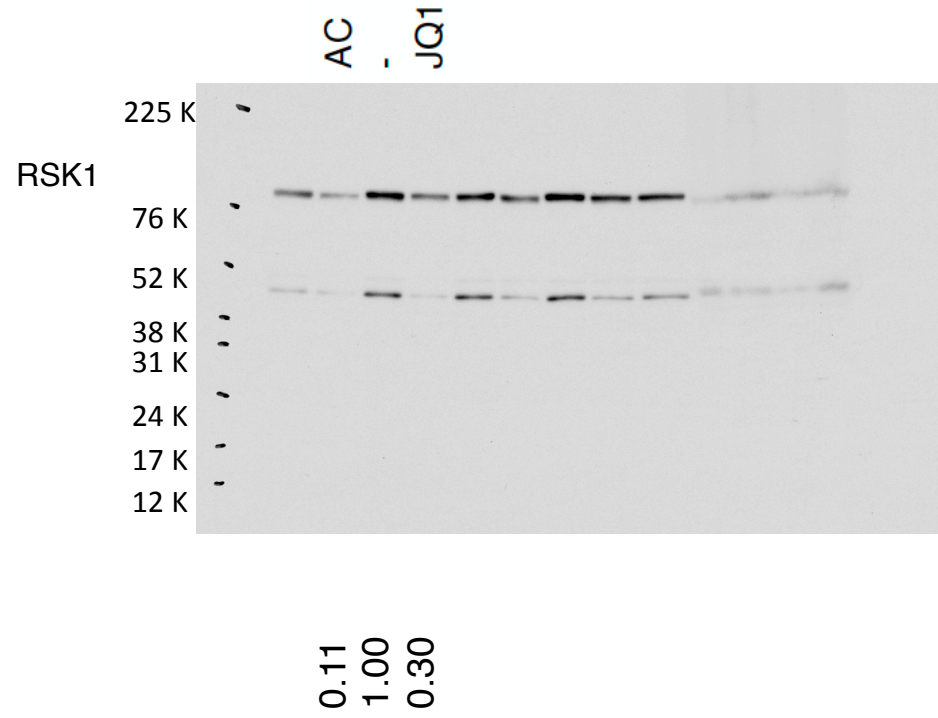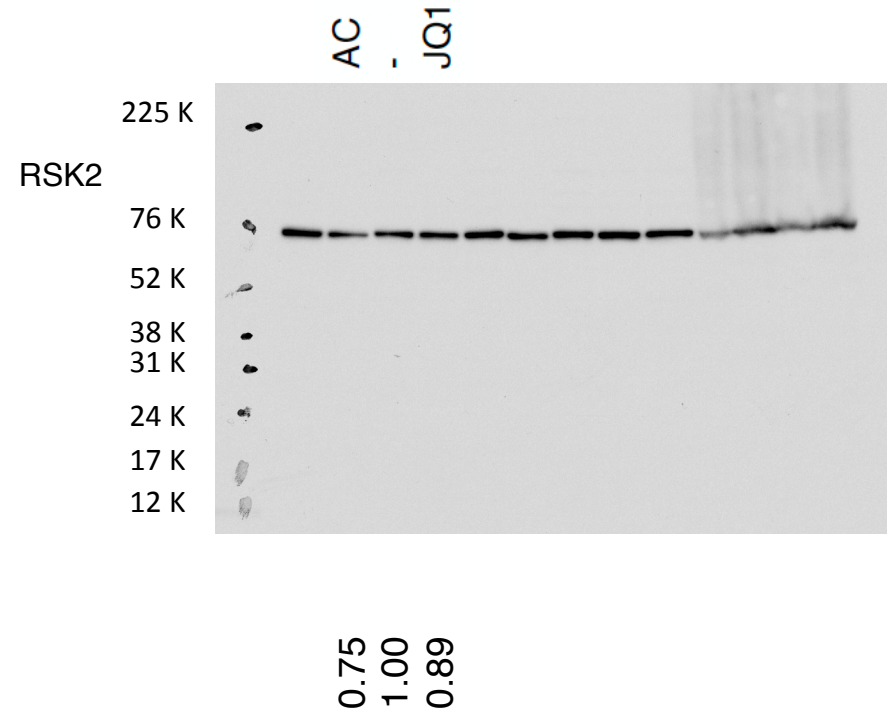

Figure 3H

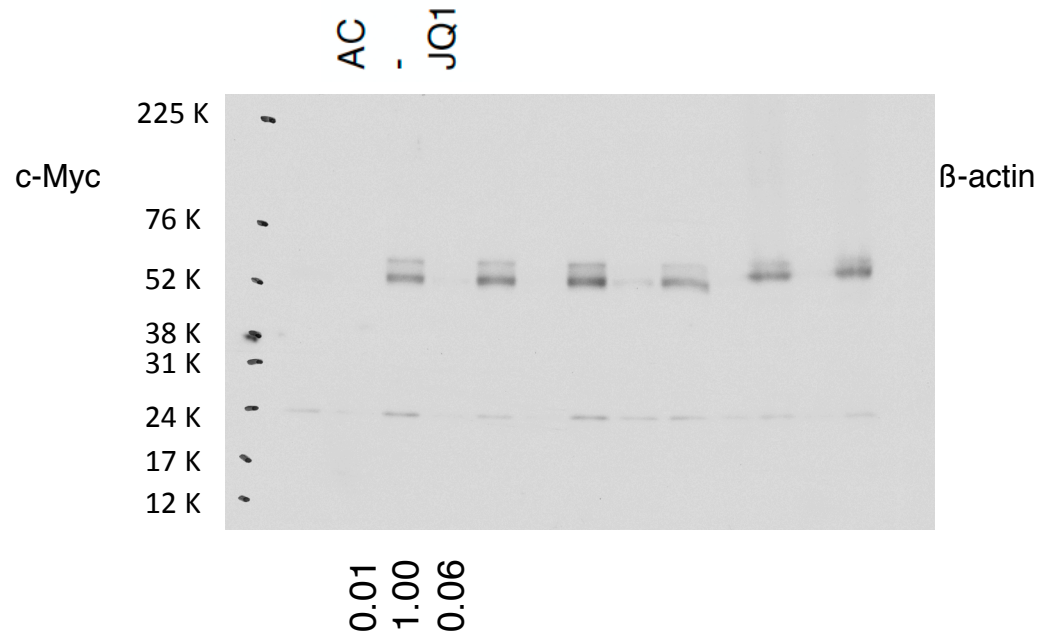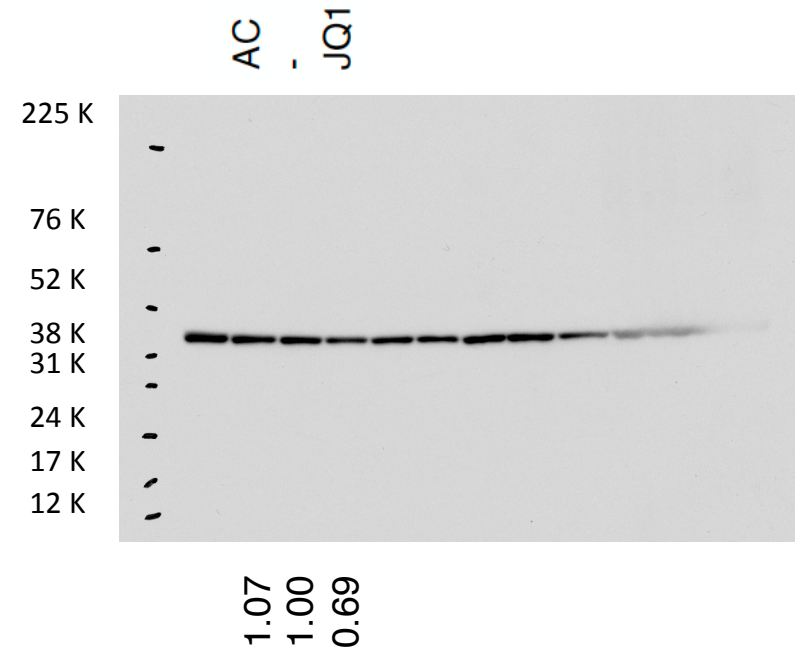

Figure 3I

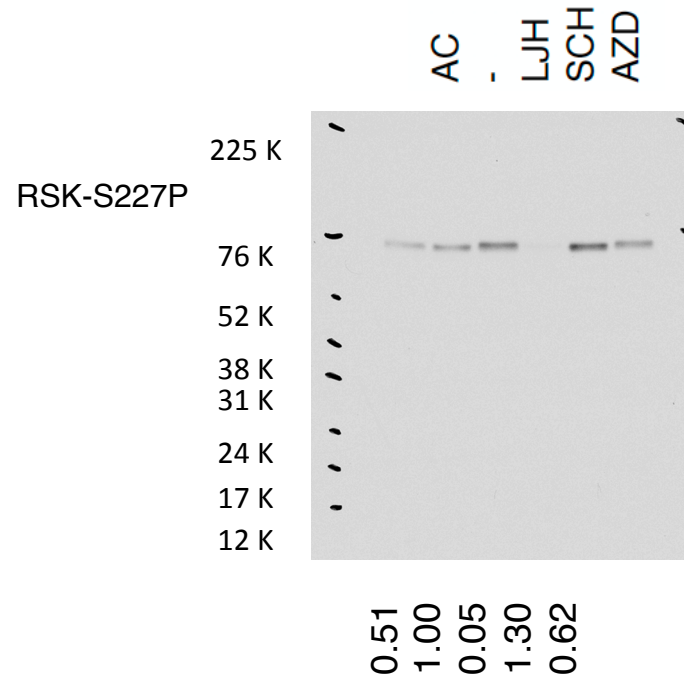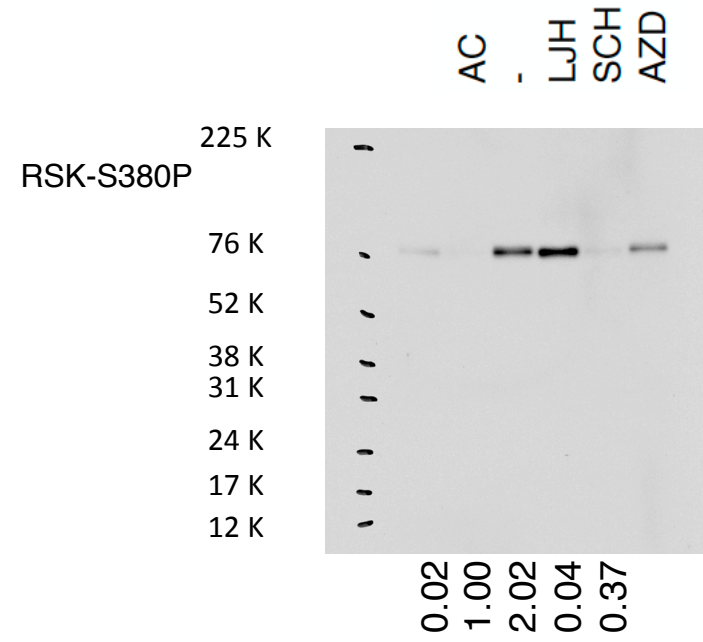

Figure 3I

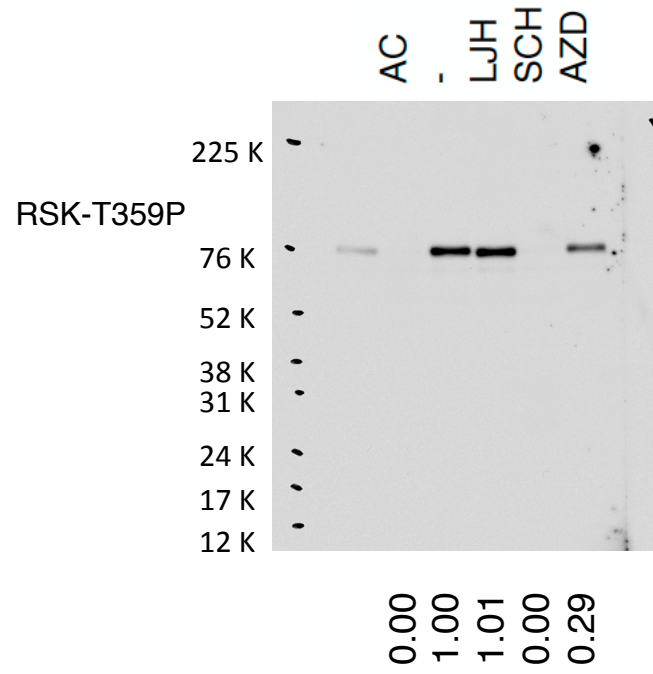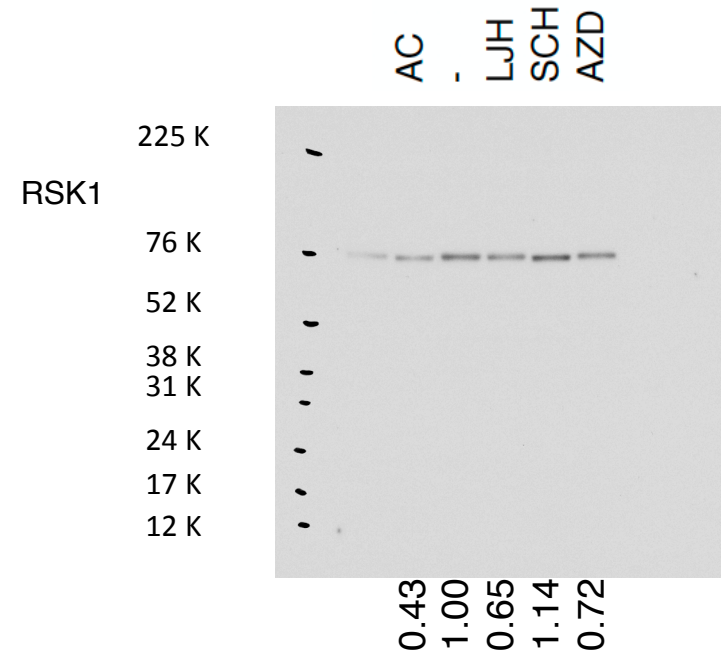

Figure 3I

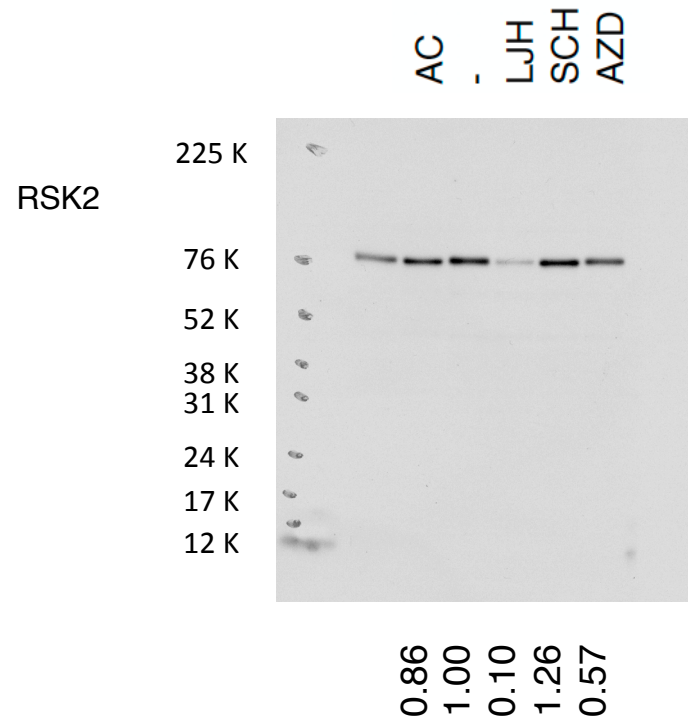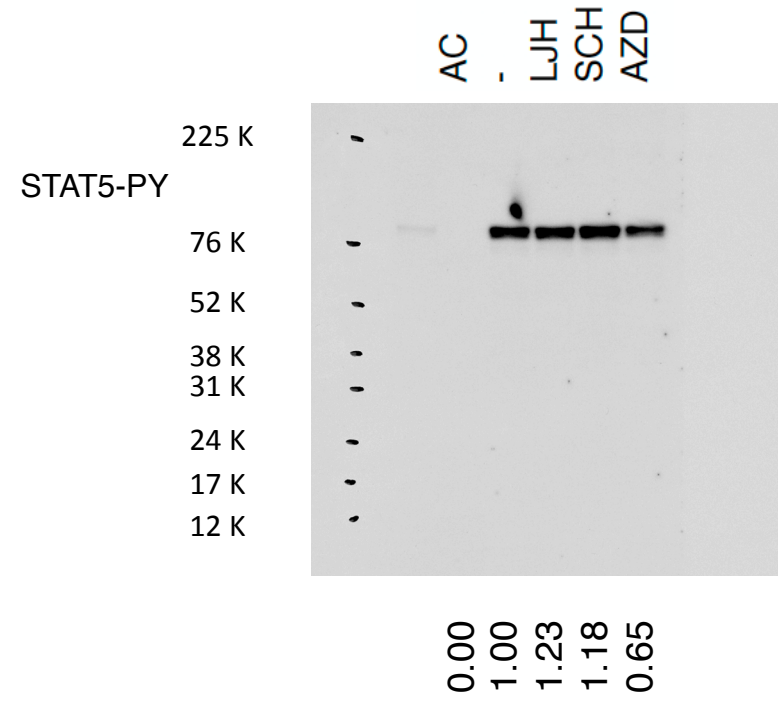

Figure 3I

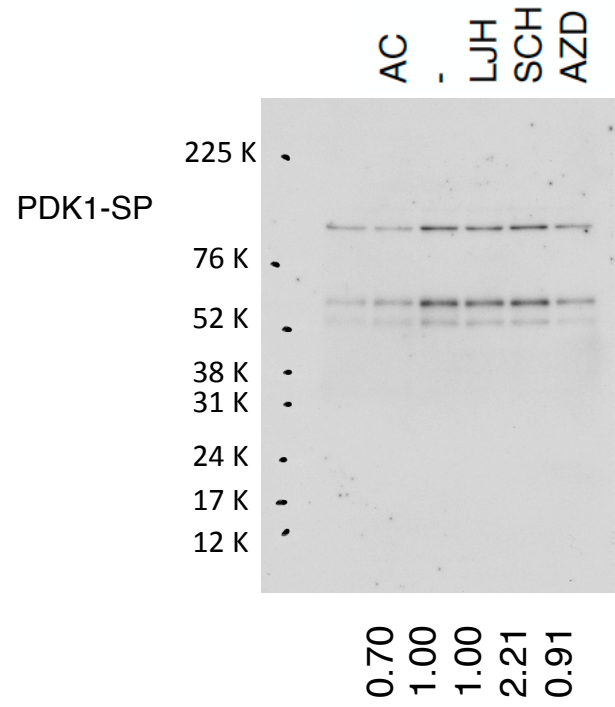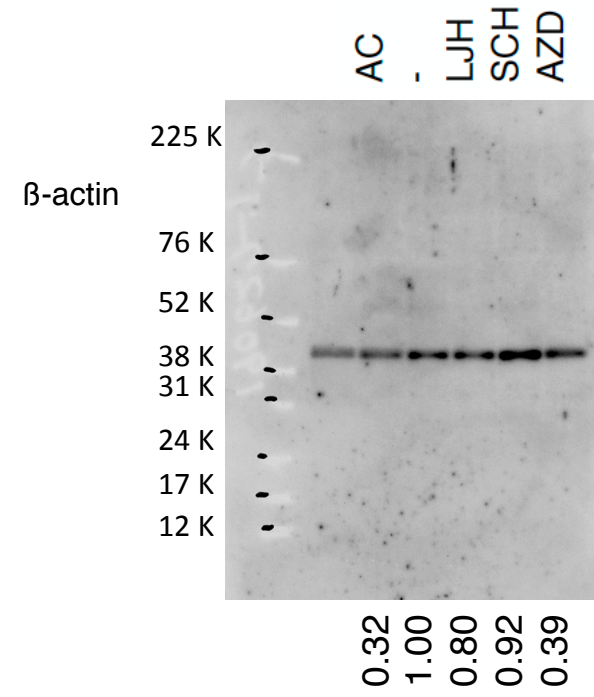

Figure 4A

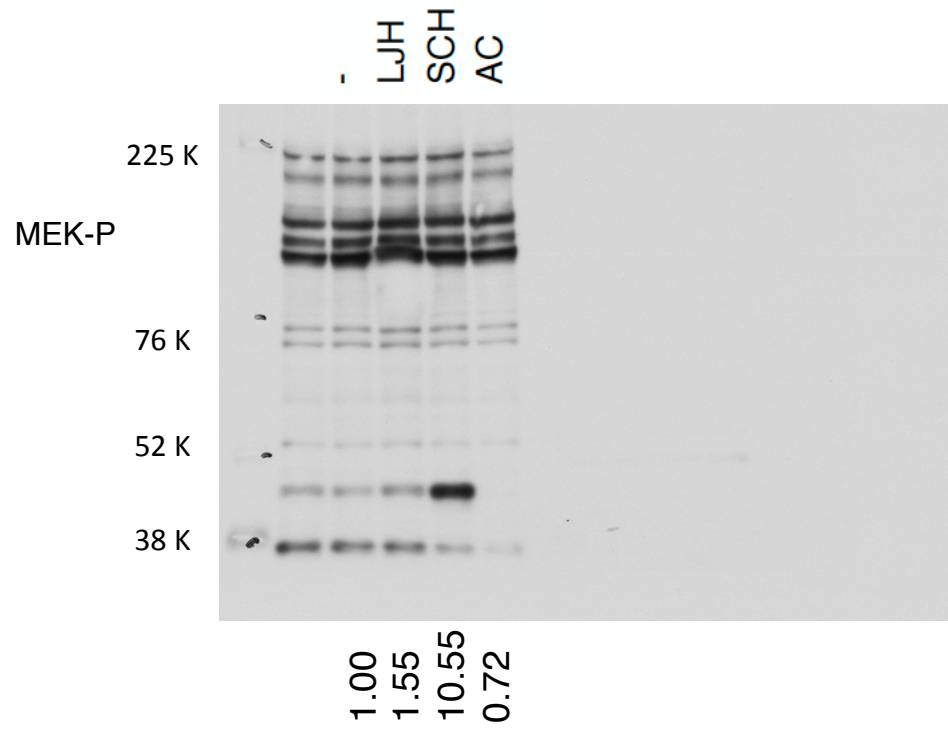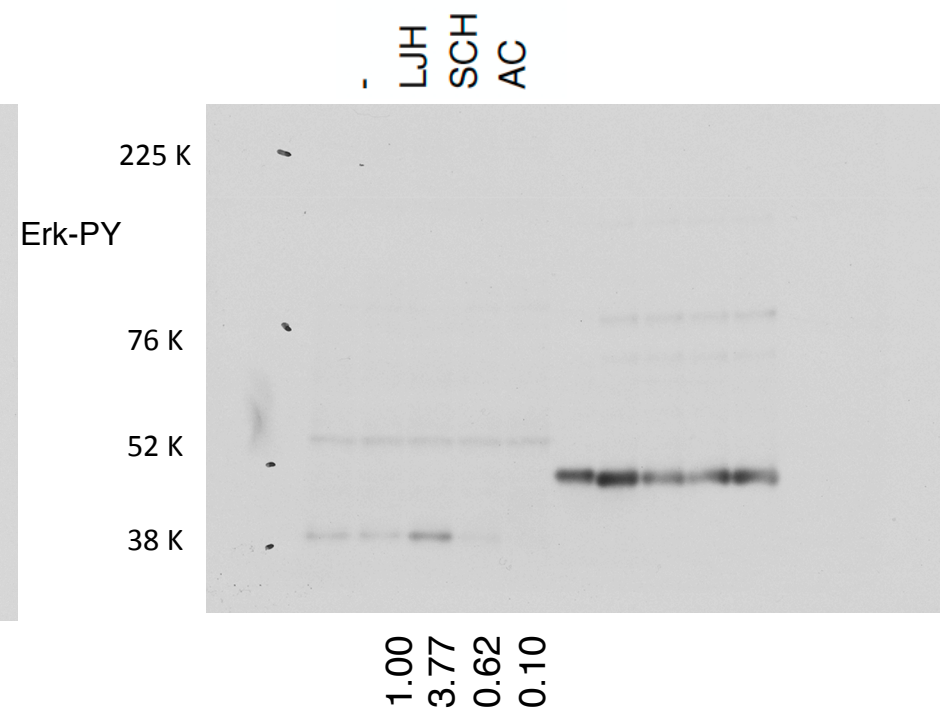

Figure 4A

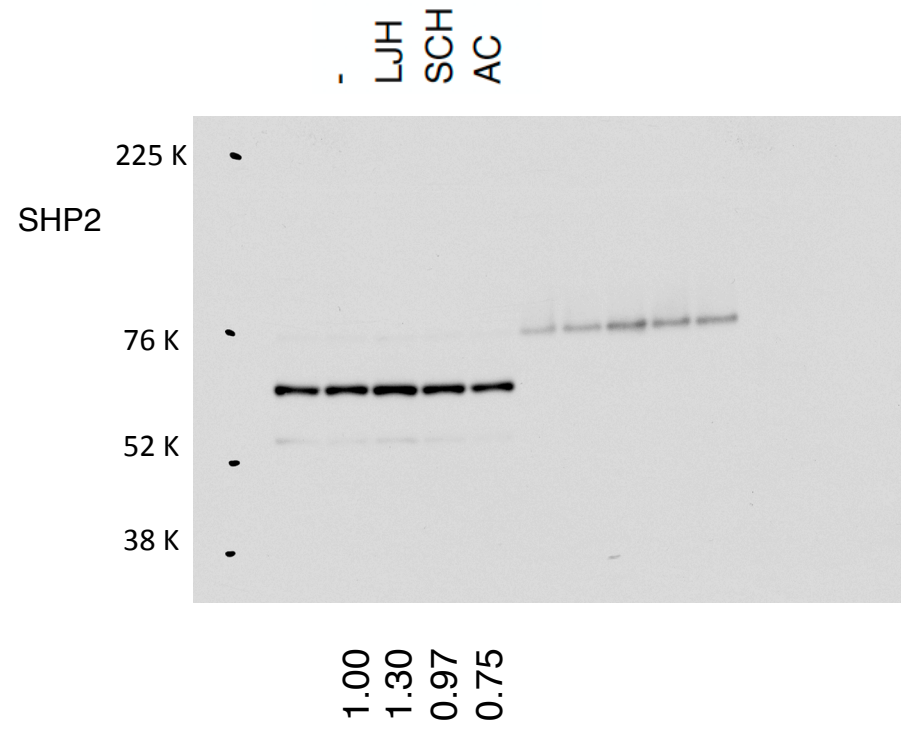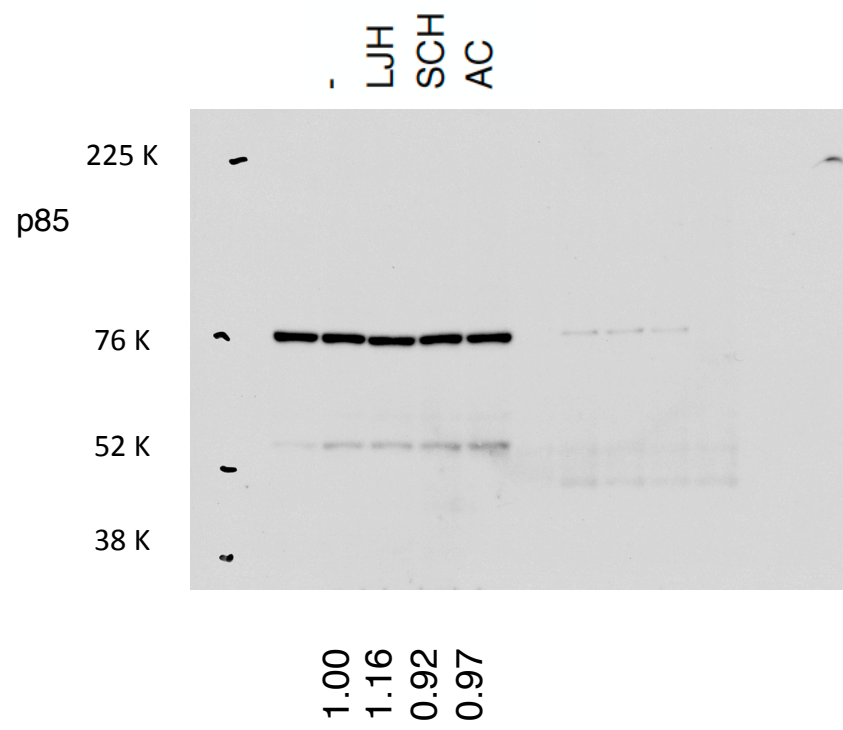

Figure 4A

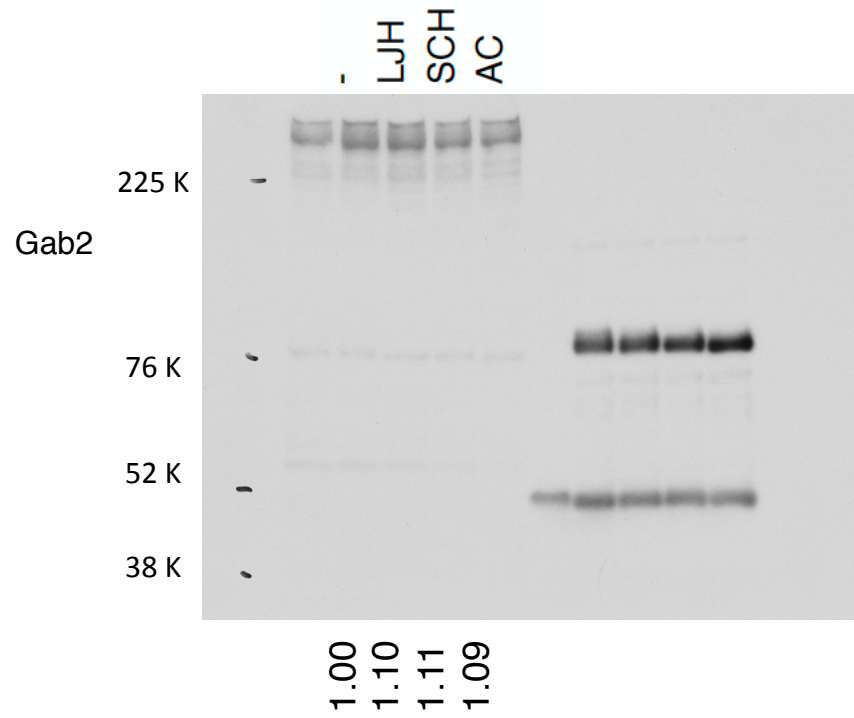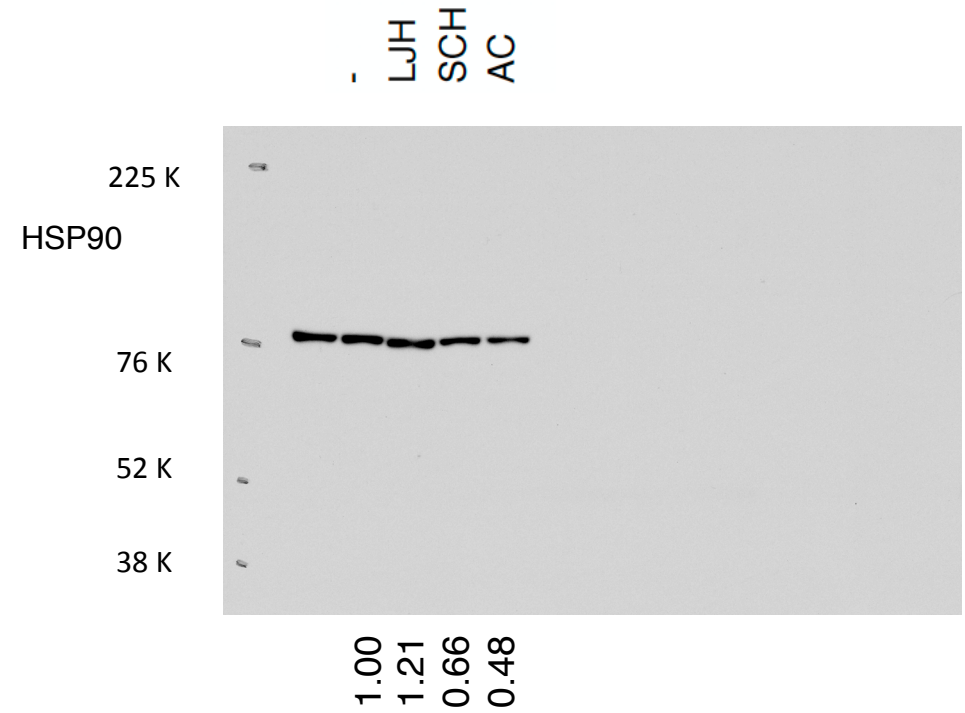

Figure 4B

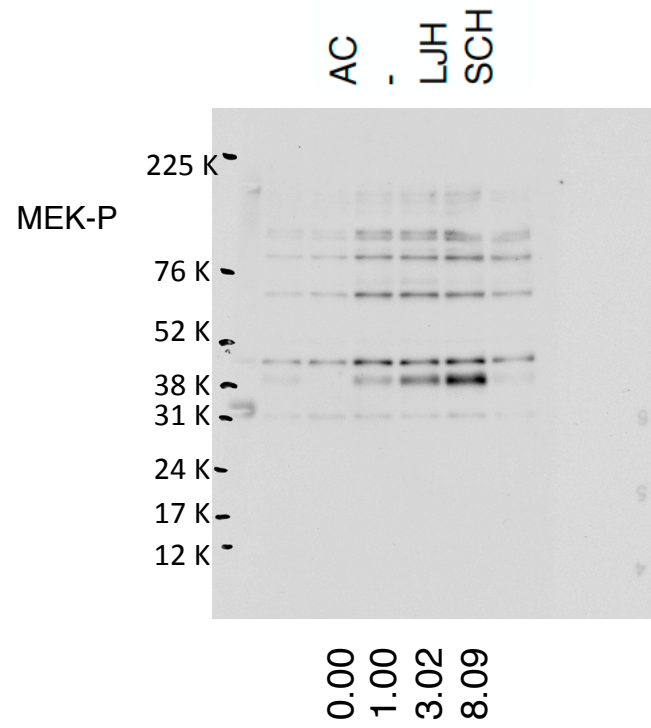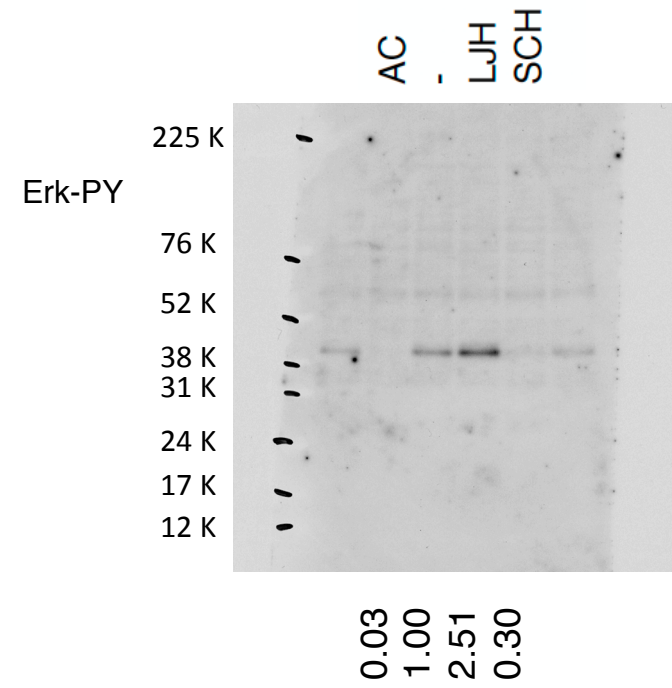

Figure 4B

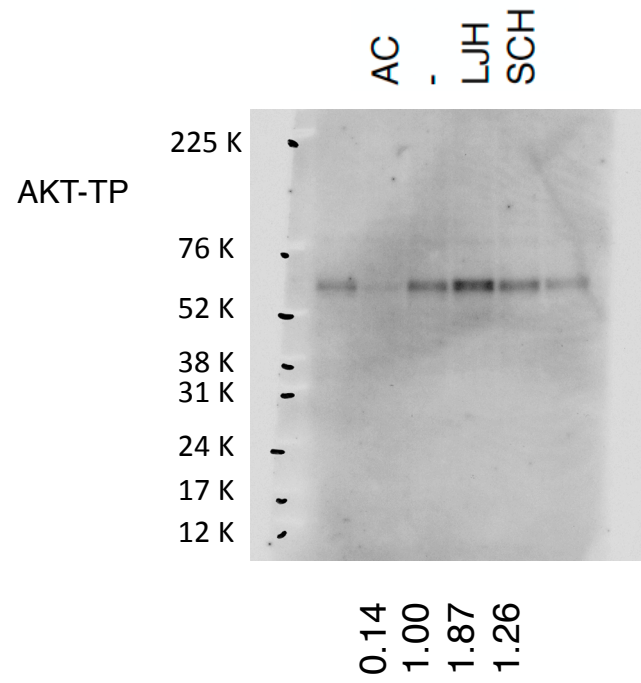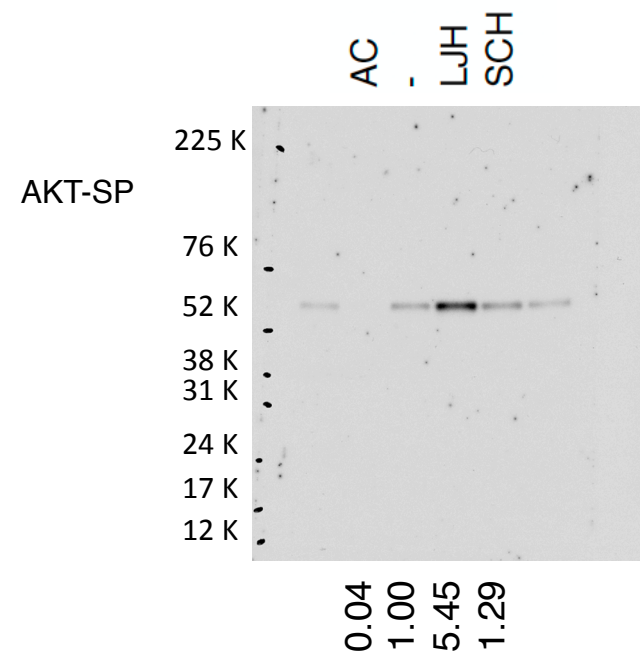

Figure 4B

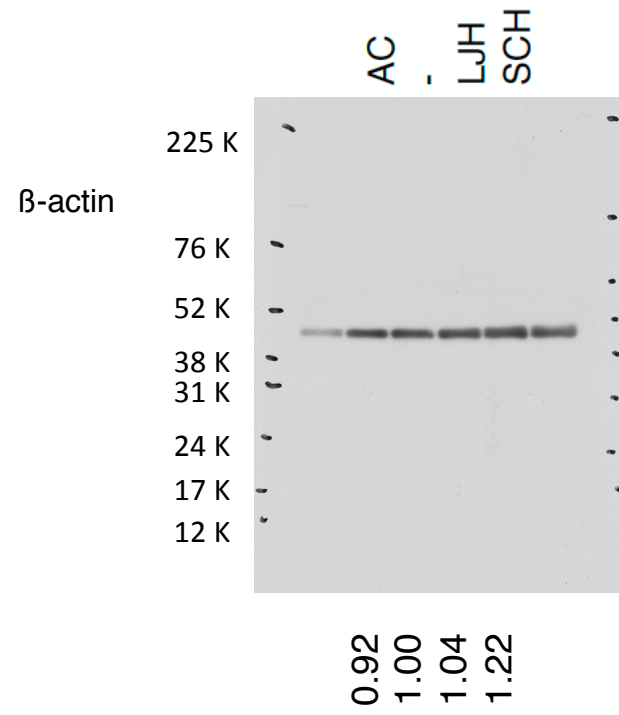

Figure 4C

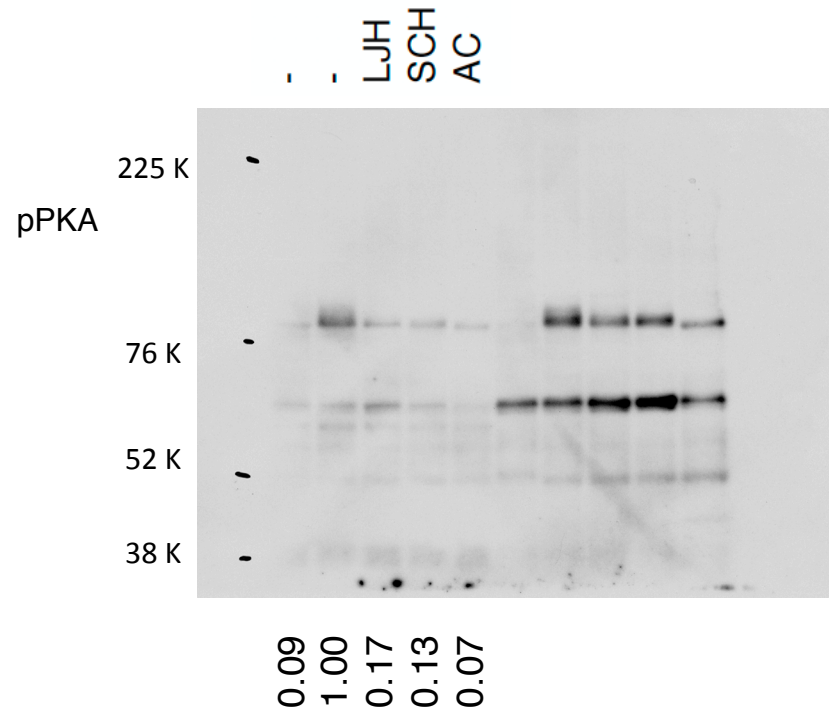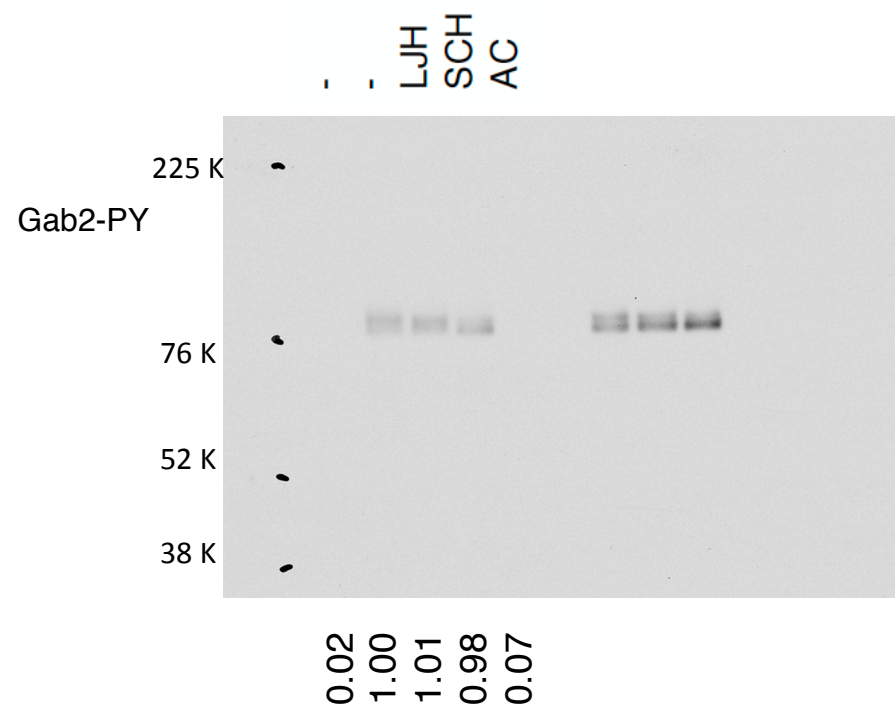

Figure 4C

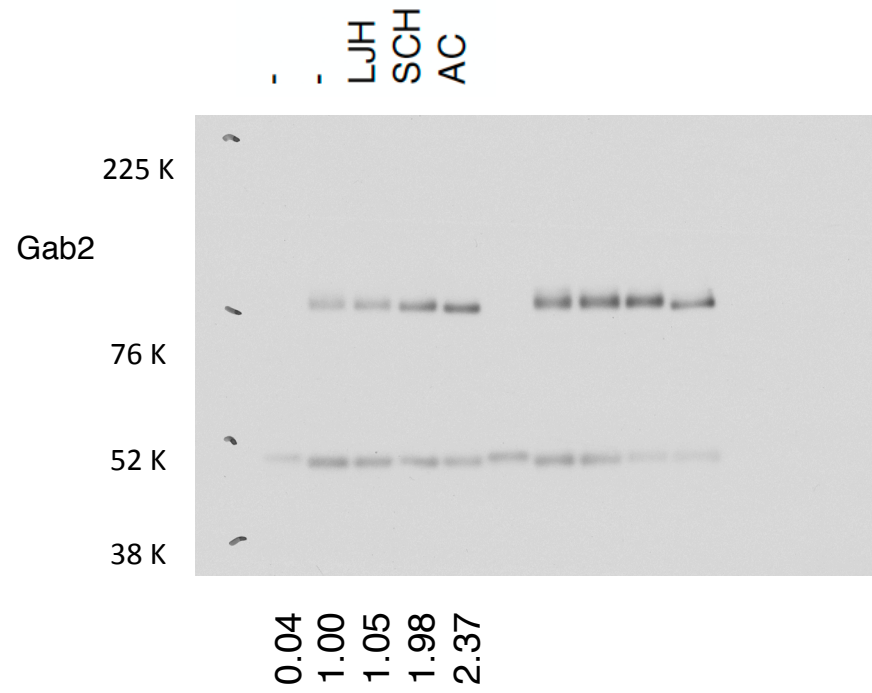

Figure 4D

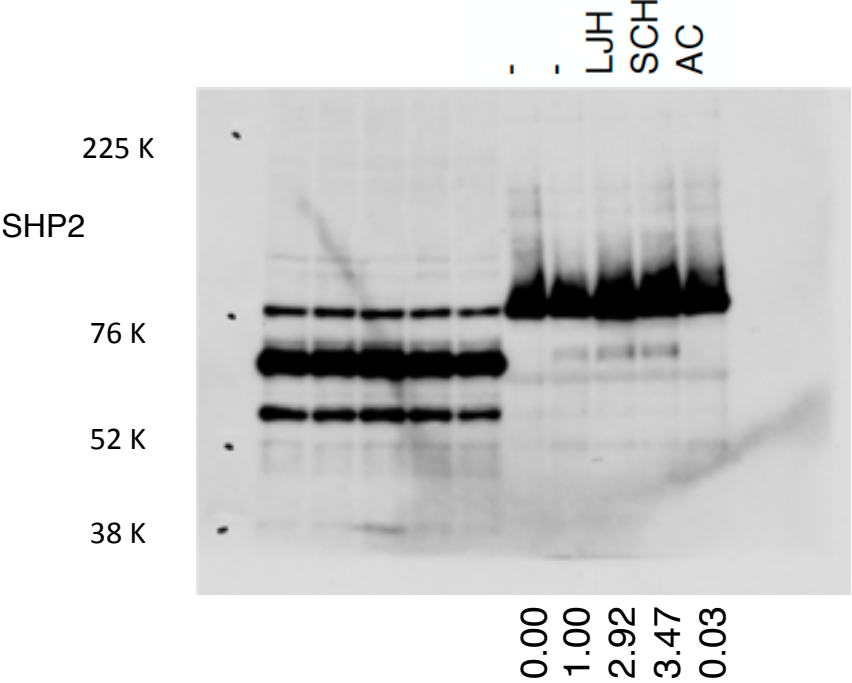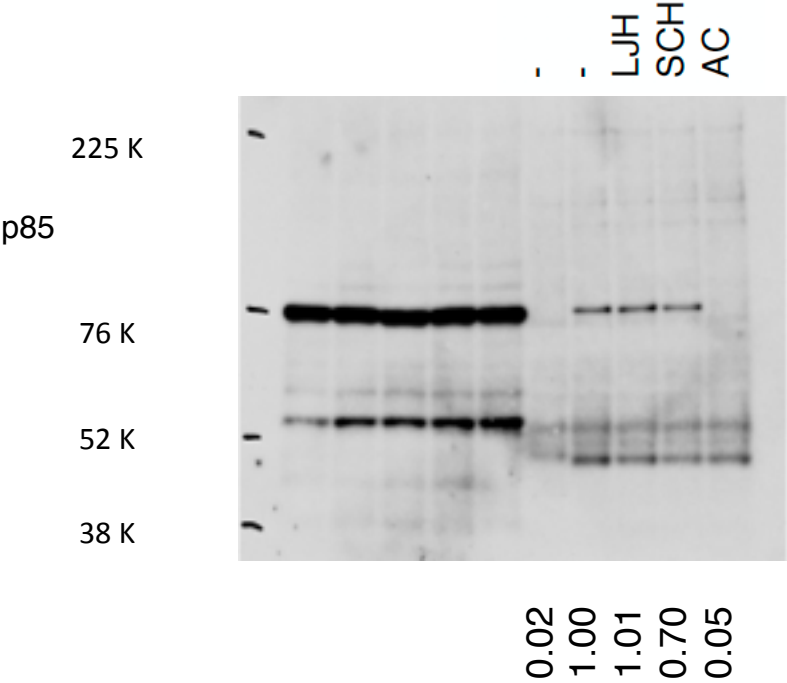

Figure 4D

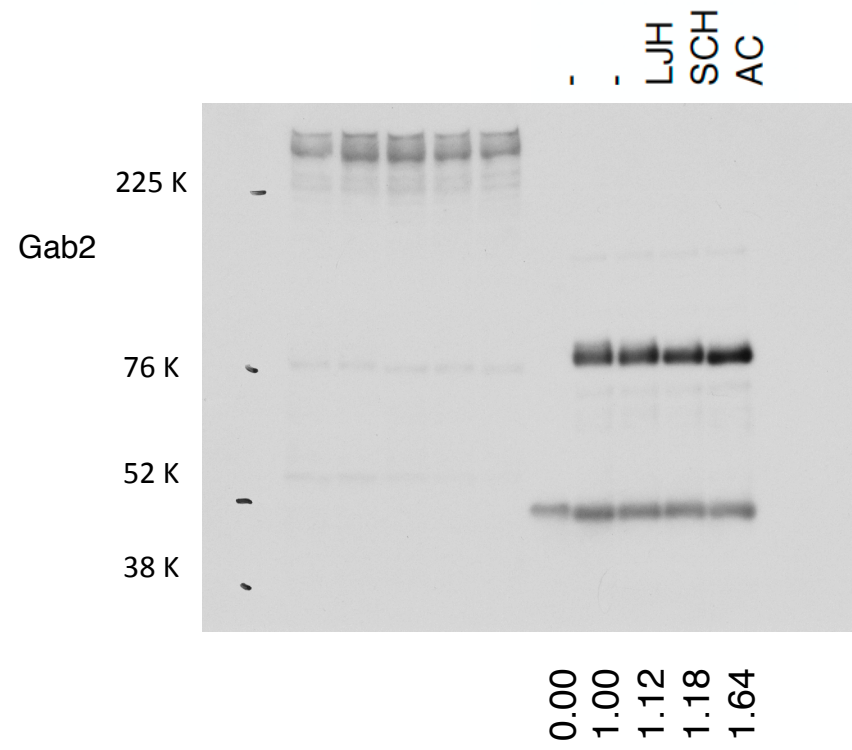

Figure 4E

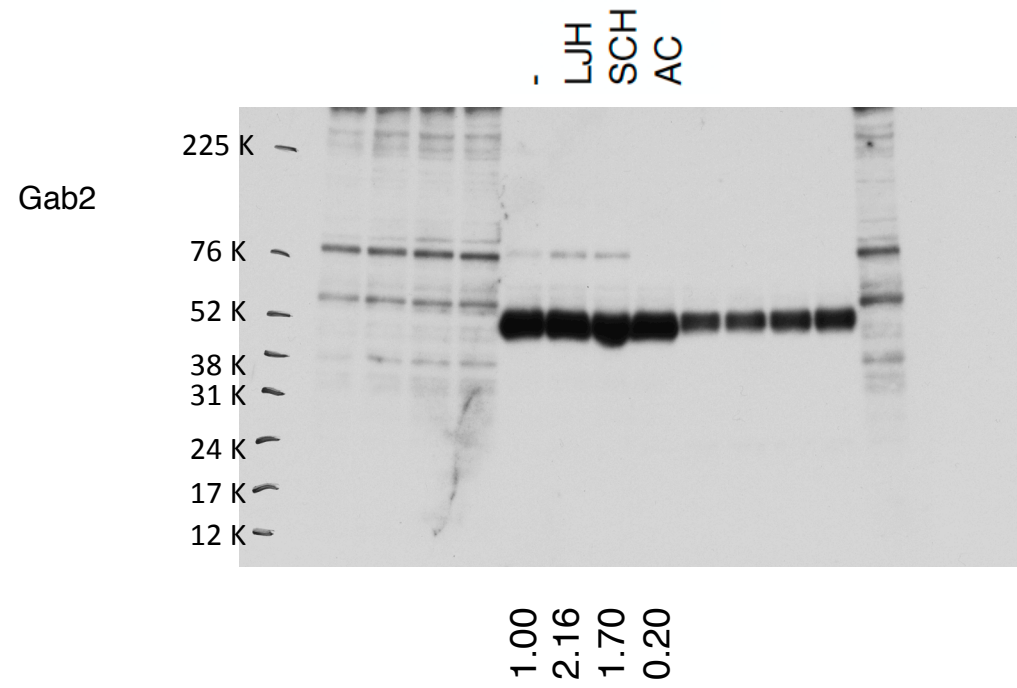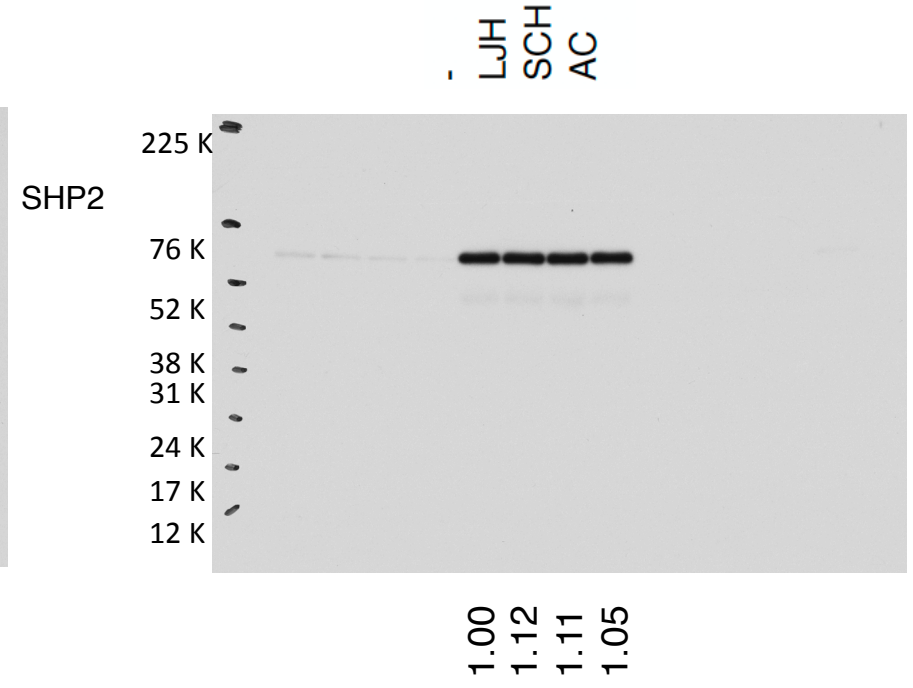

Figure 4F

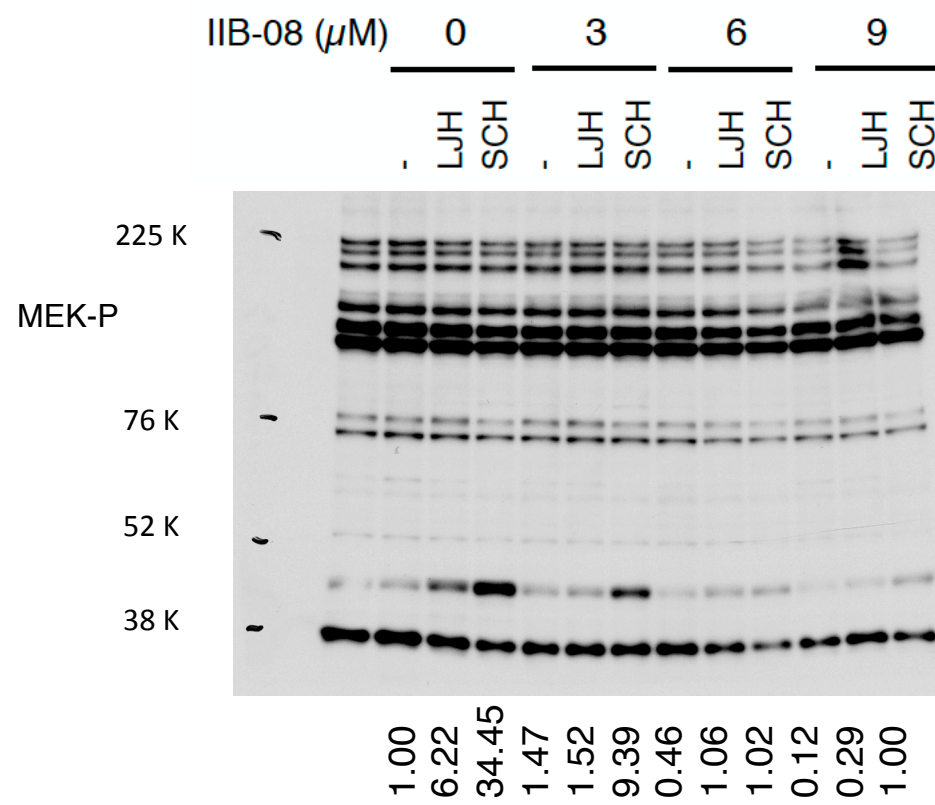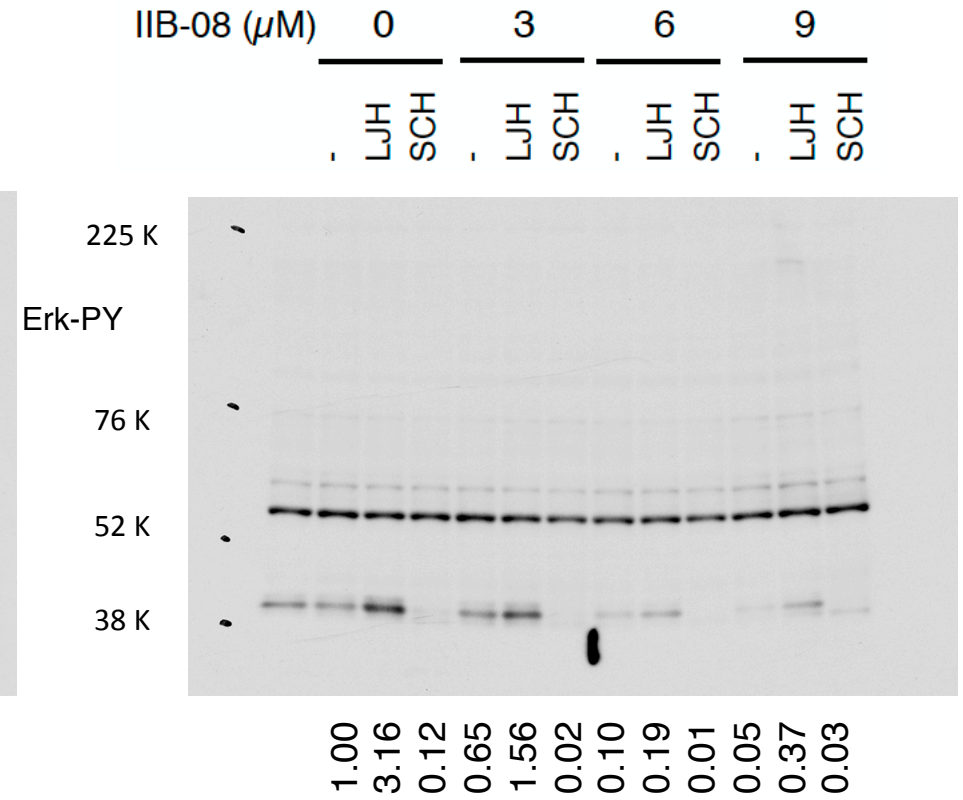

Figure 4F

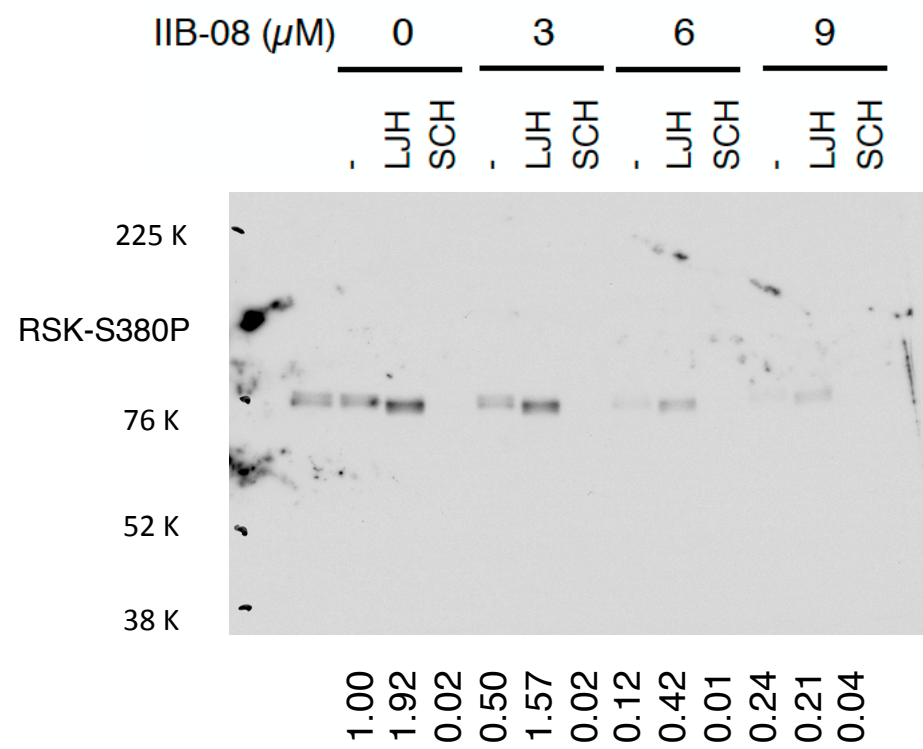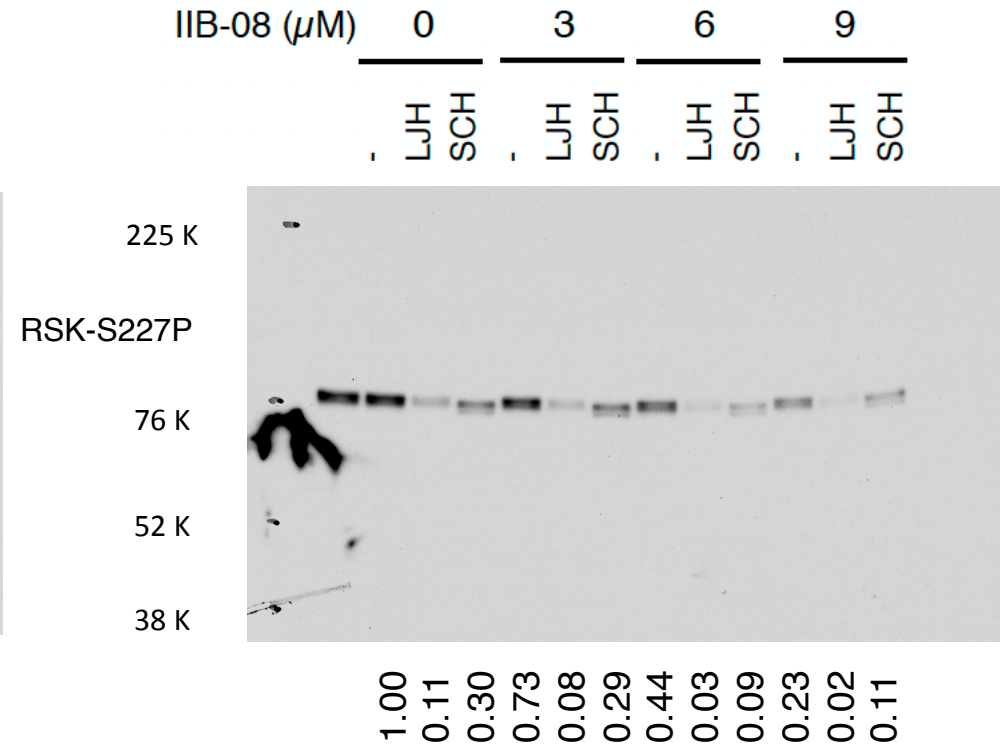

Figure 4F

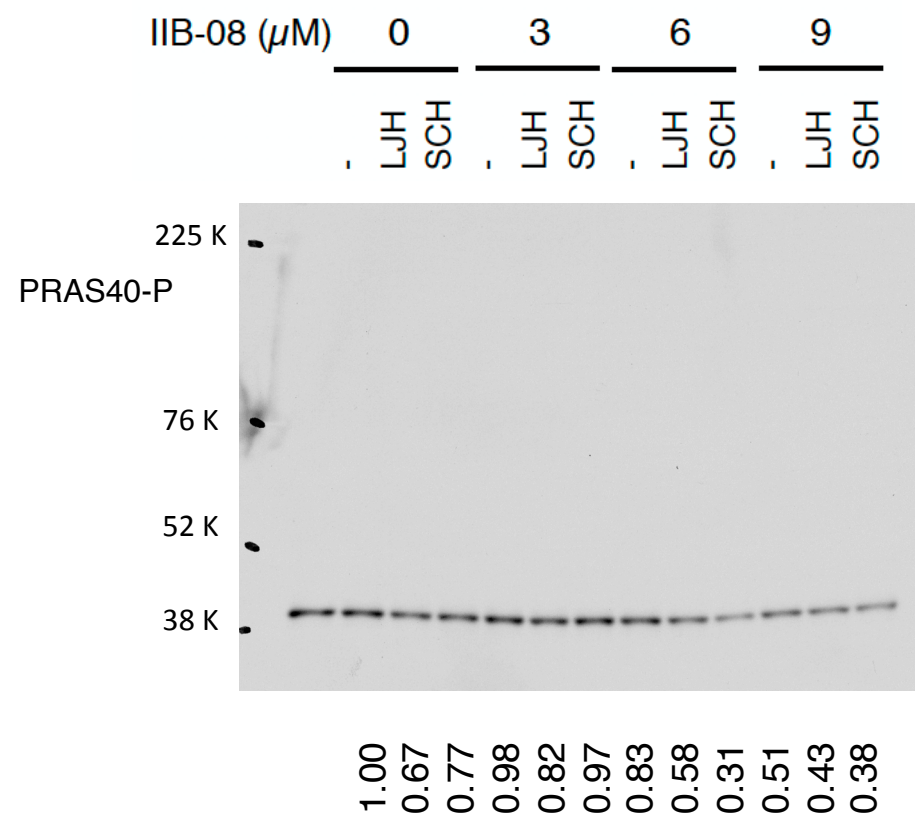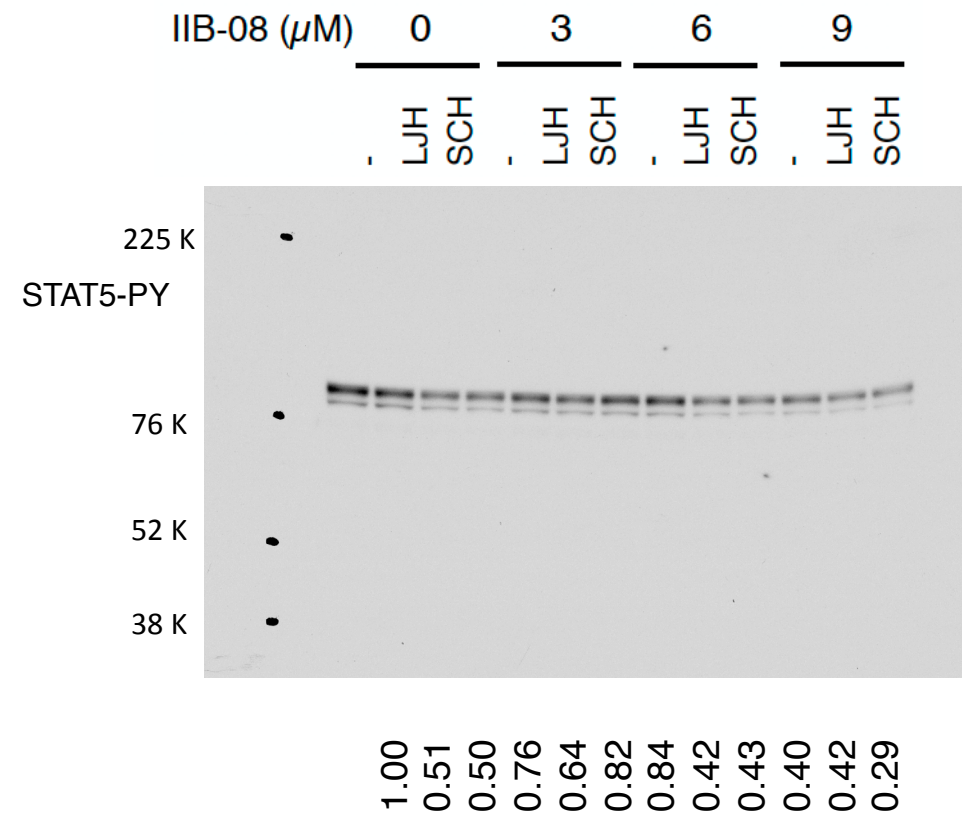

Figure 4F

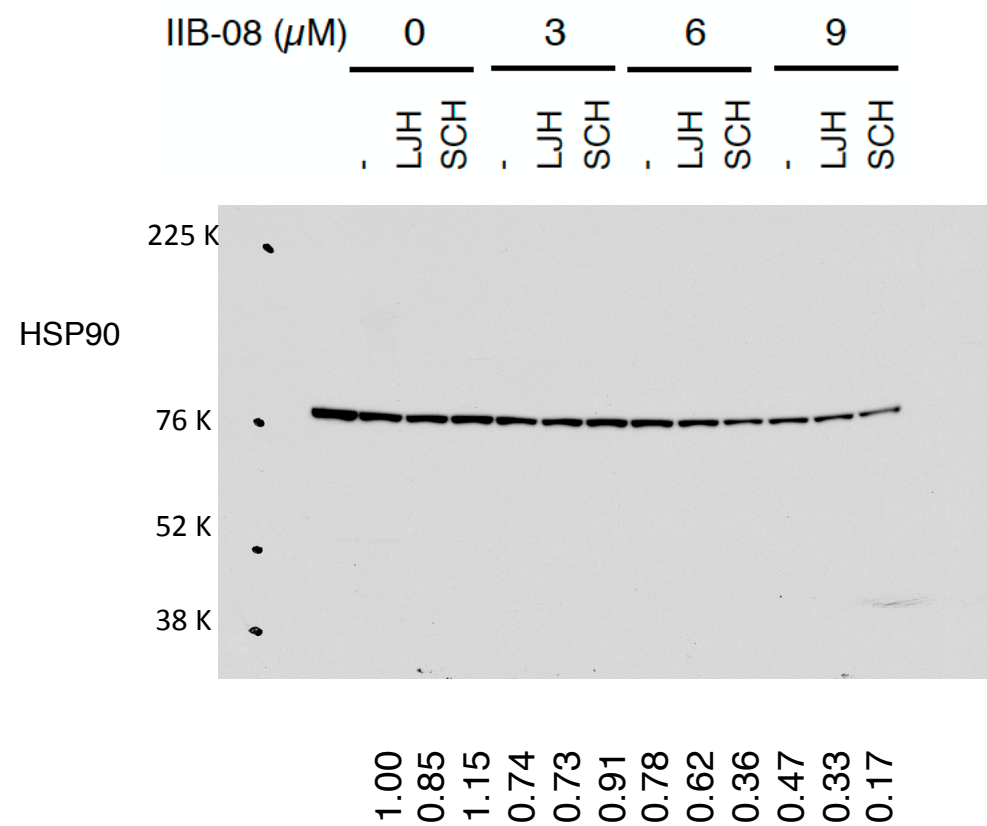

Figure 5A

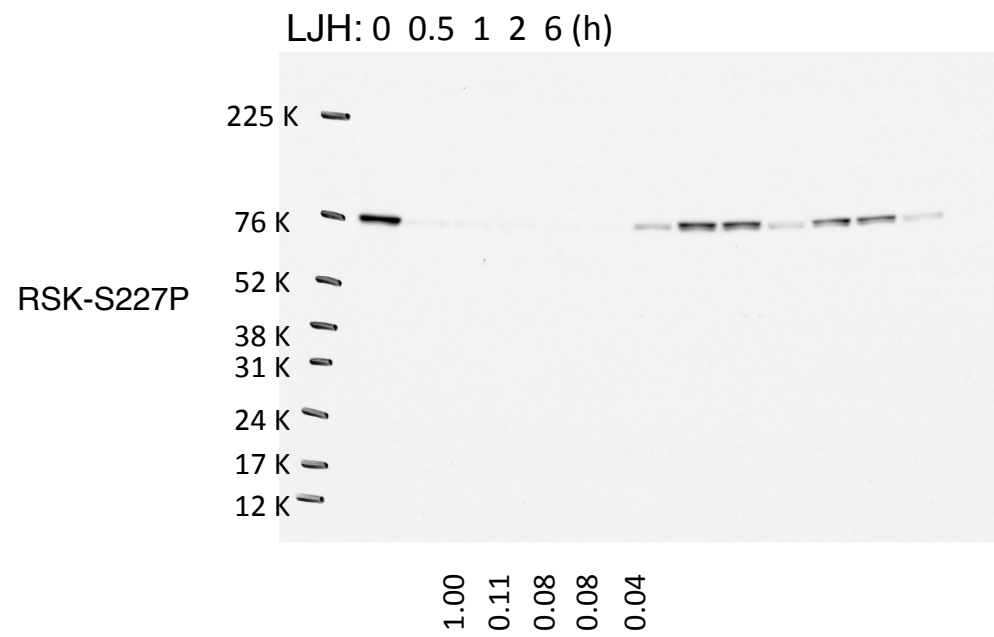

Figure 5A

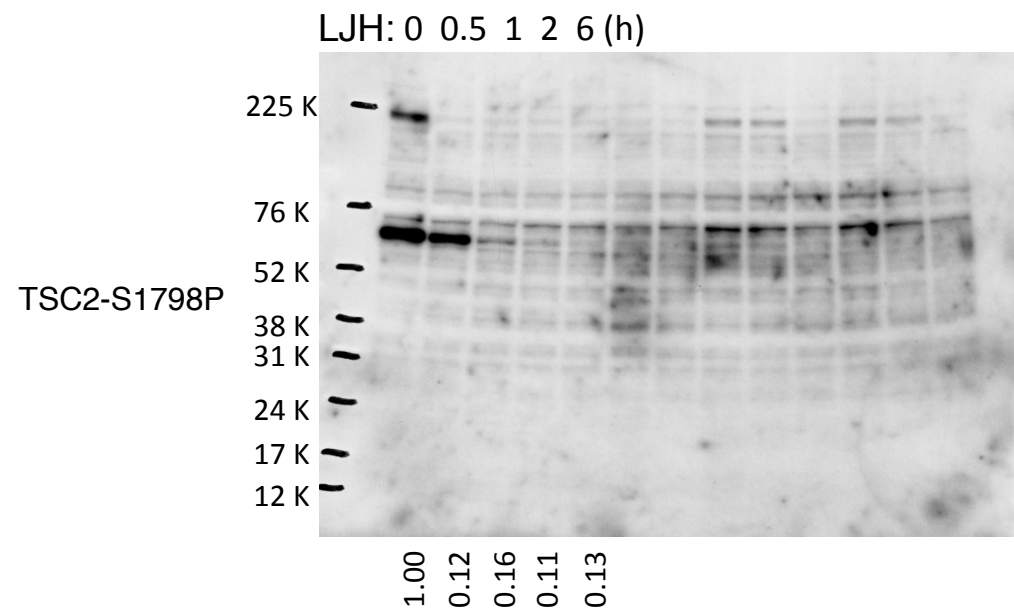

Figure 5A

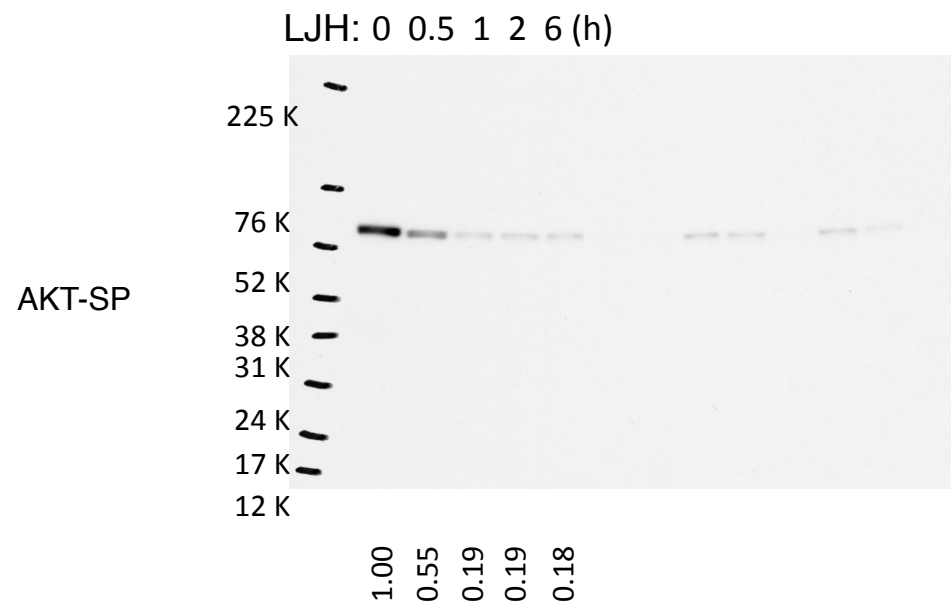

Figure 5A

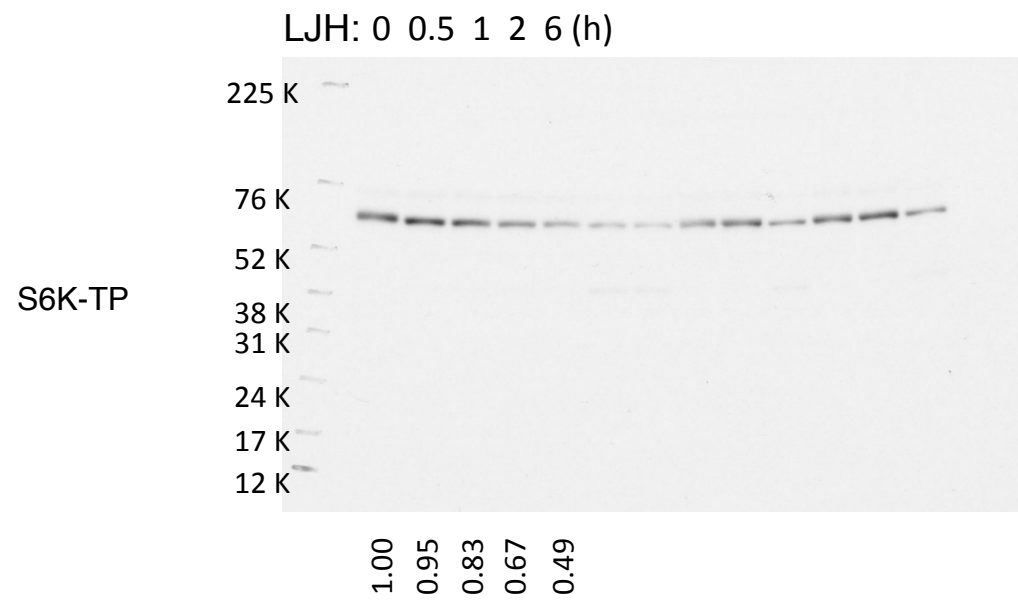

Figure 5A

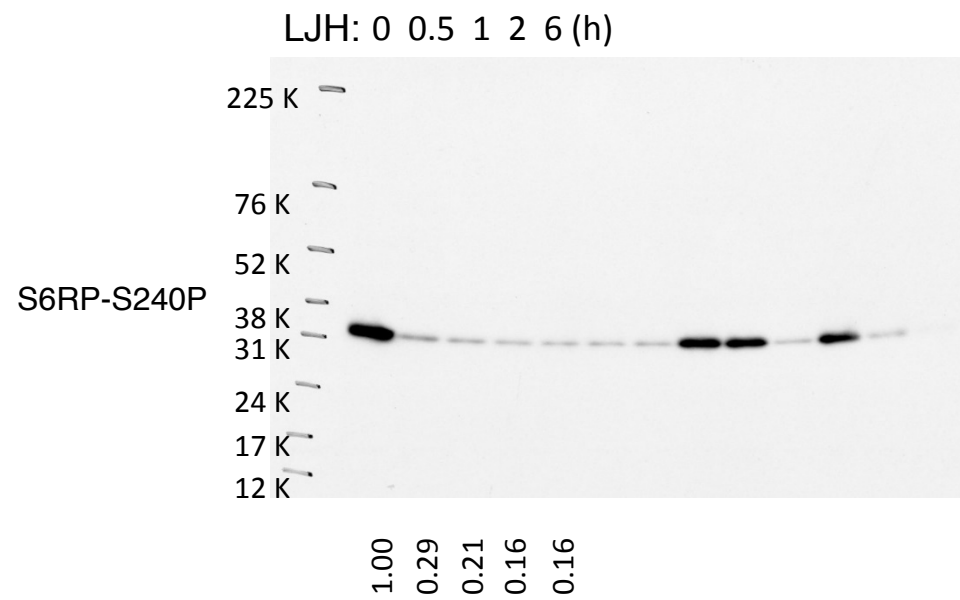

Figure 5A

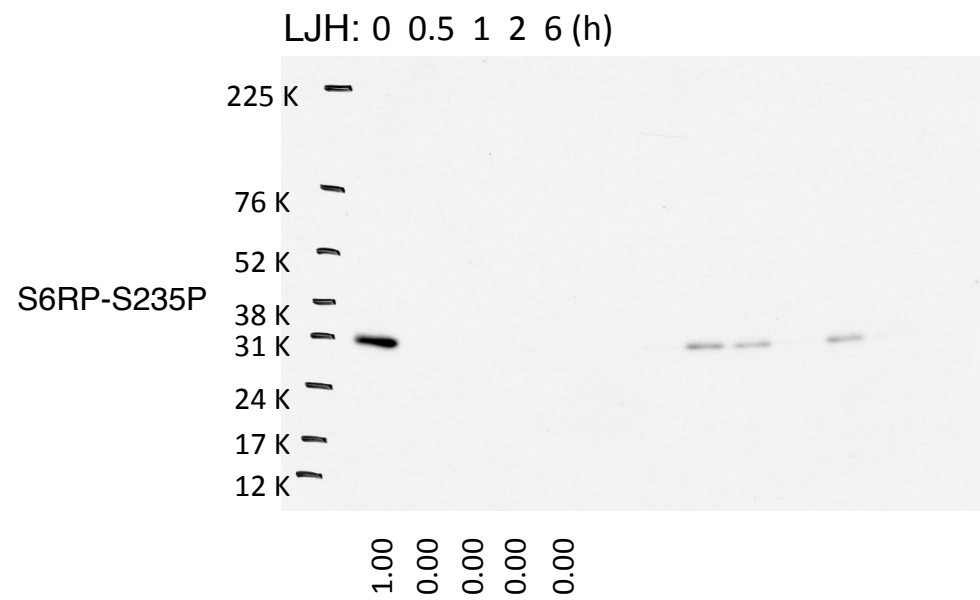

Figure 5A

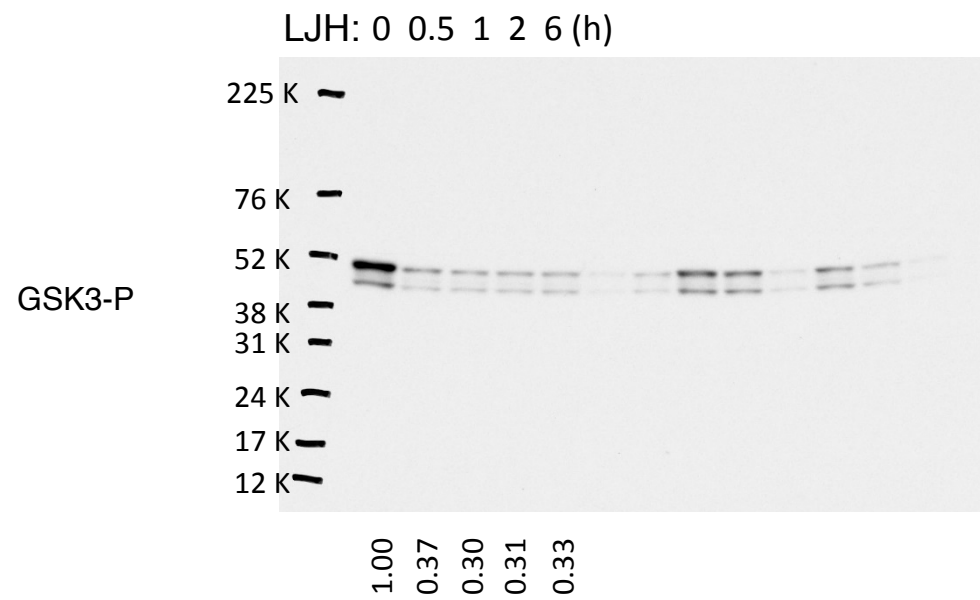

Figure 5A

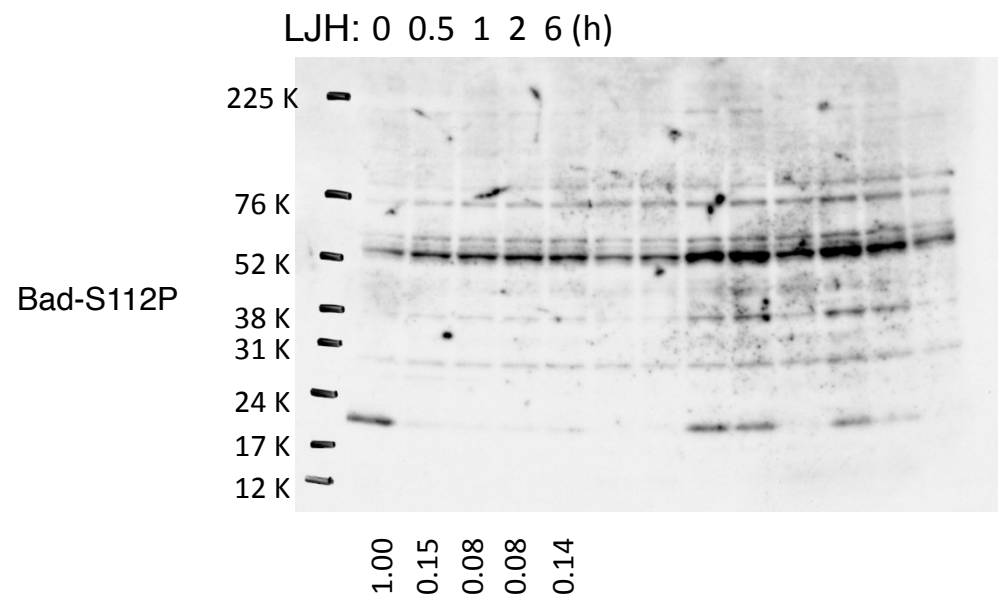

Figure 5A

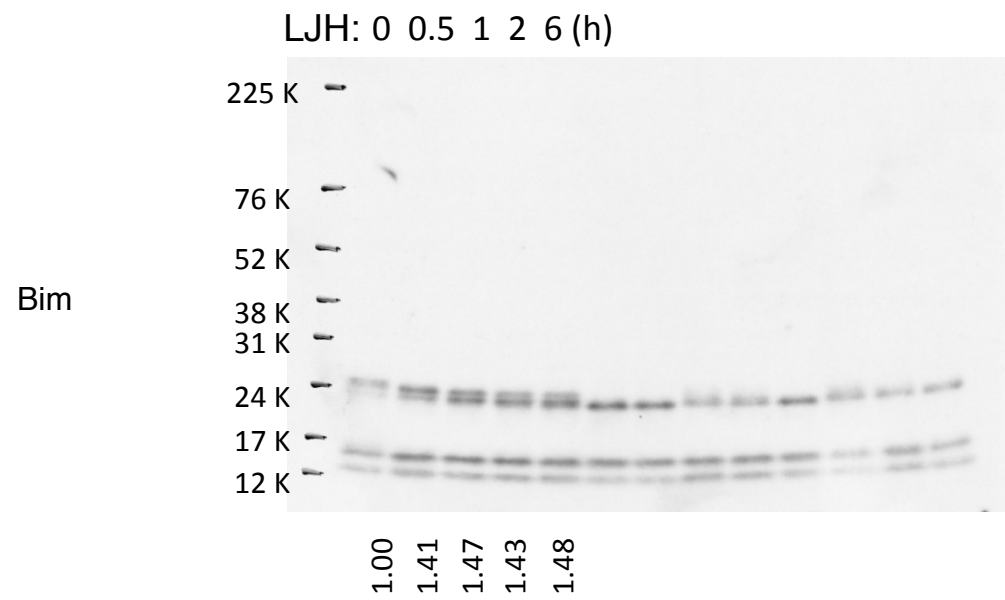

Figure 5A

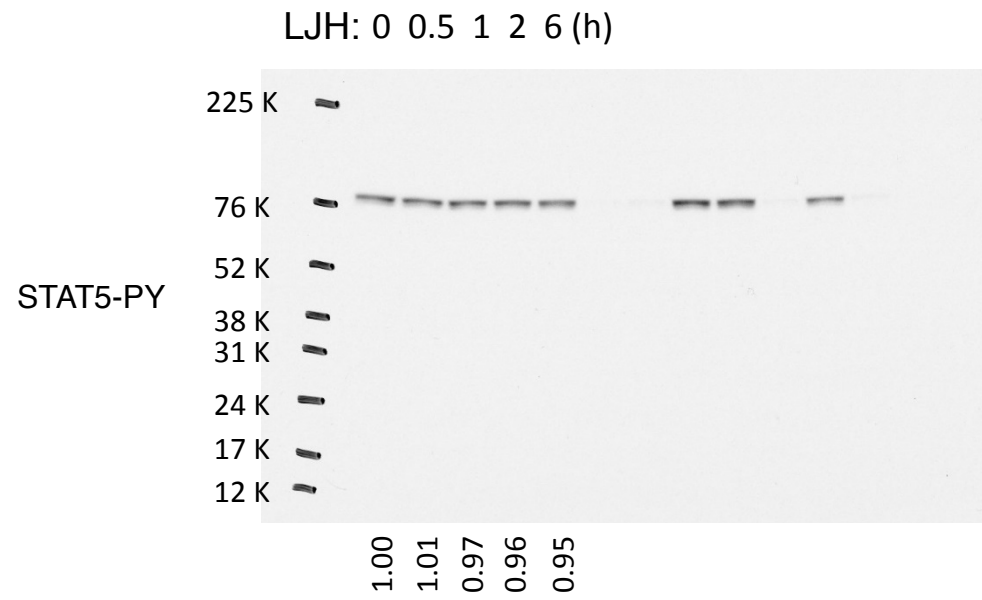

Figure 5A

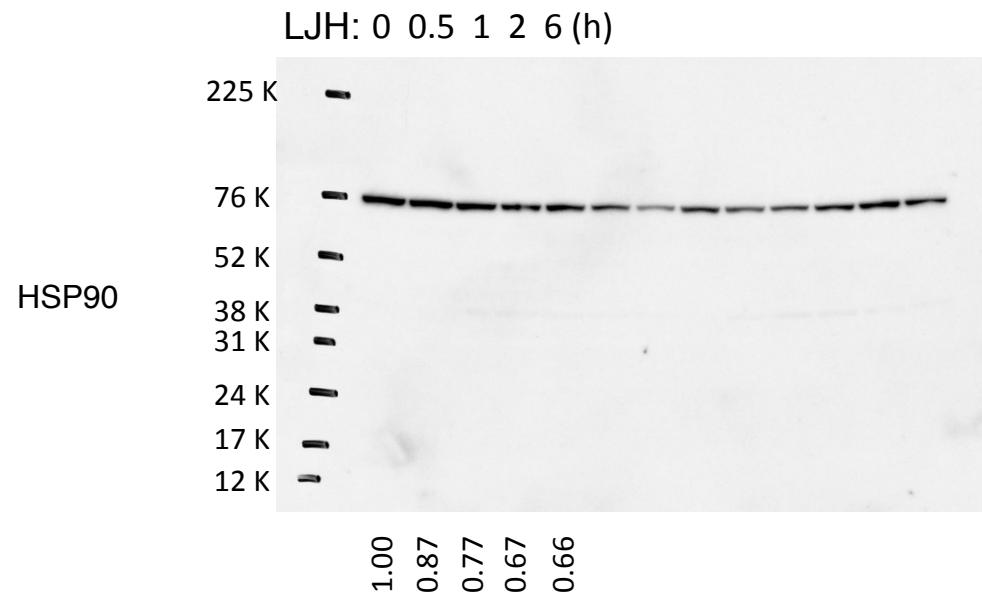

Figure 5B

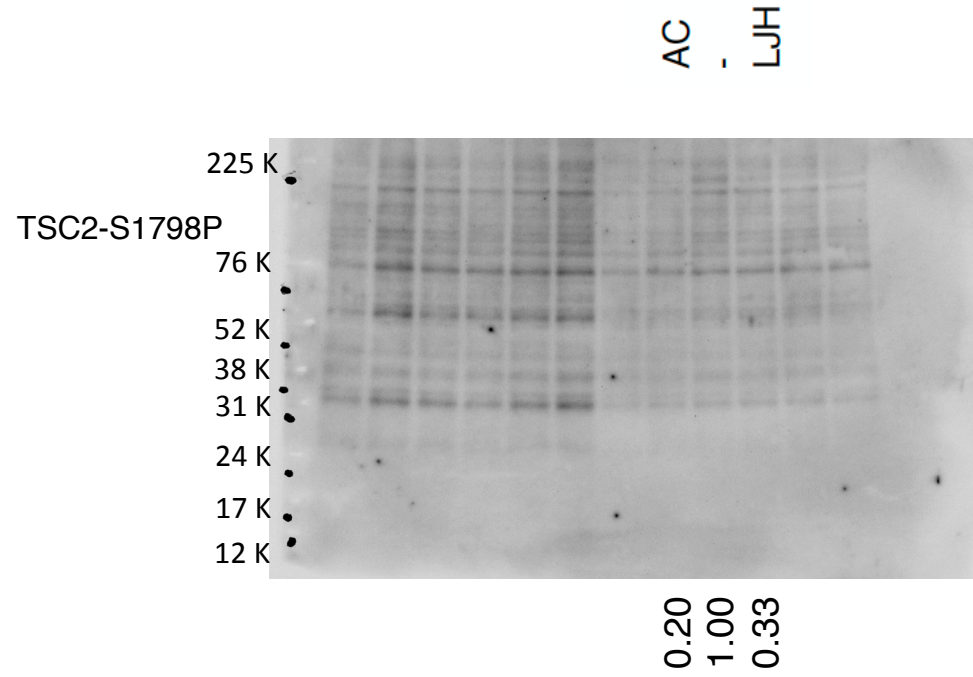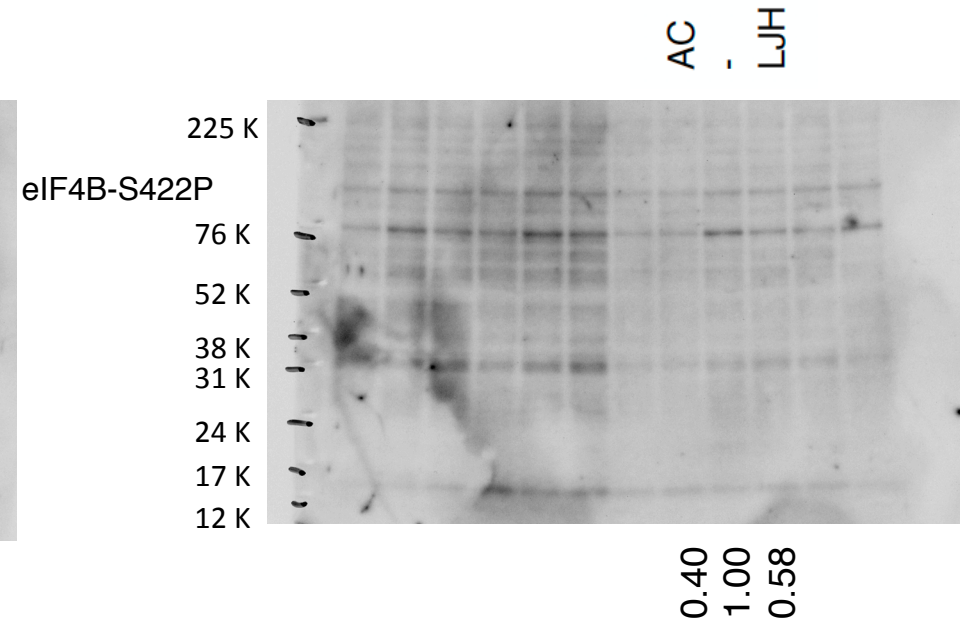

Figure 5B

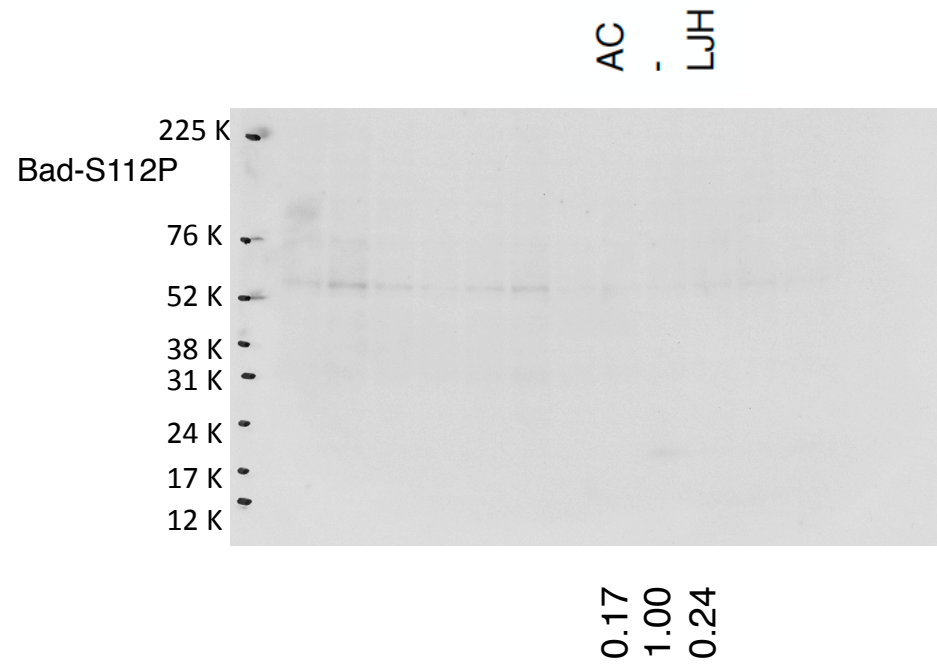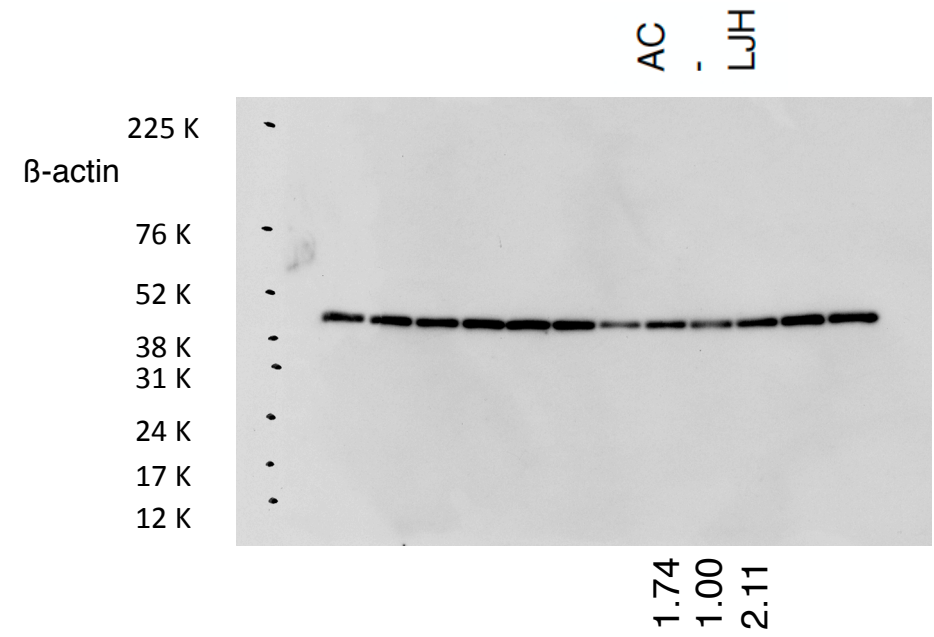

Figure 5C

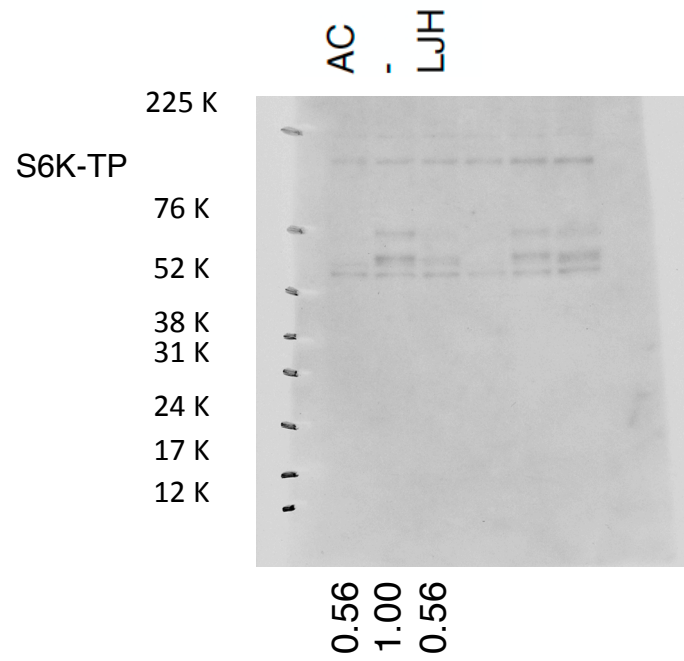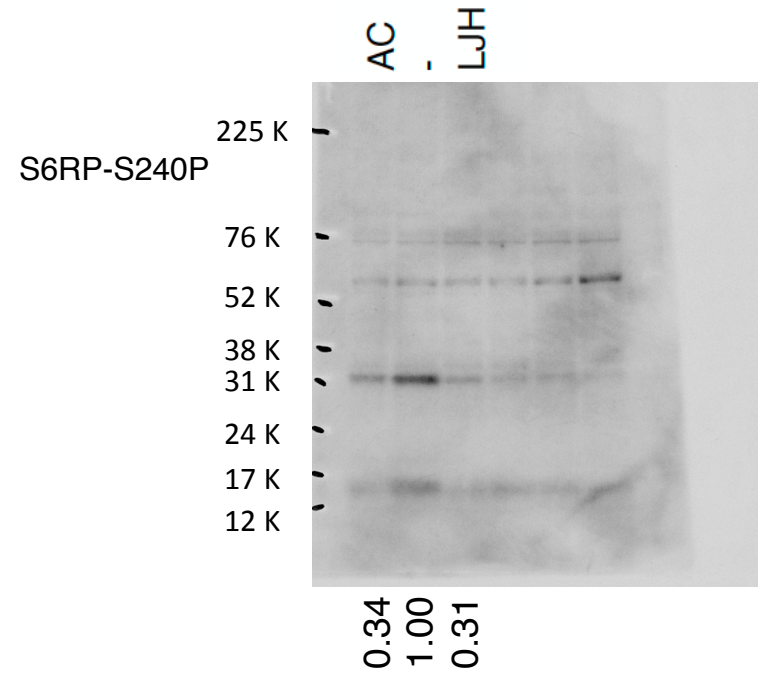

Figure 5C

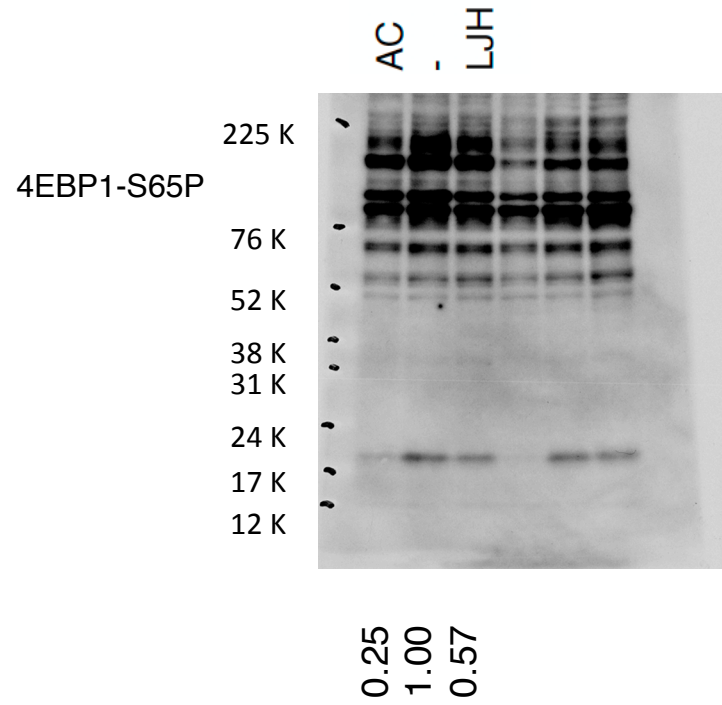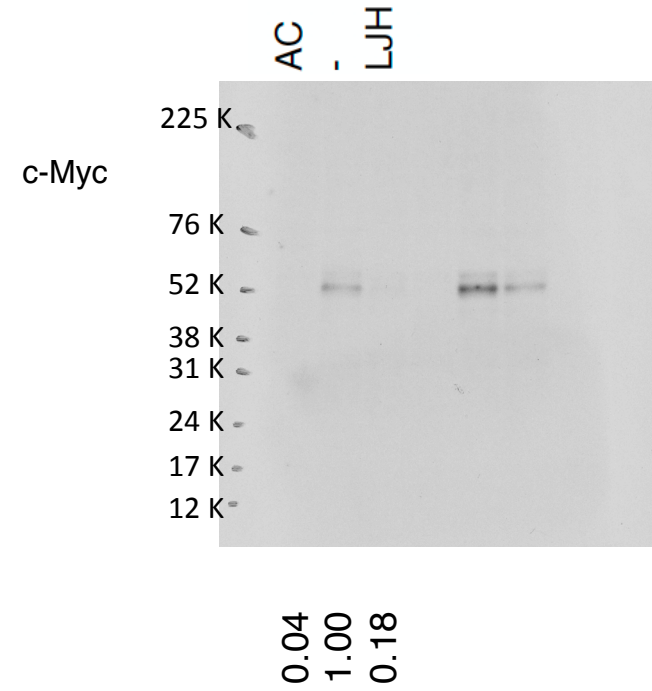

Figure 5C

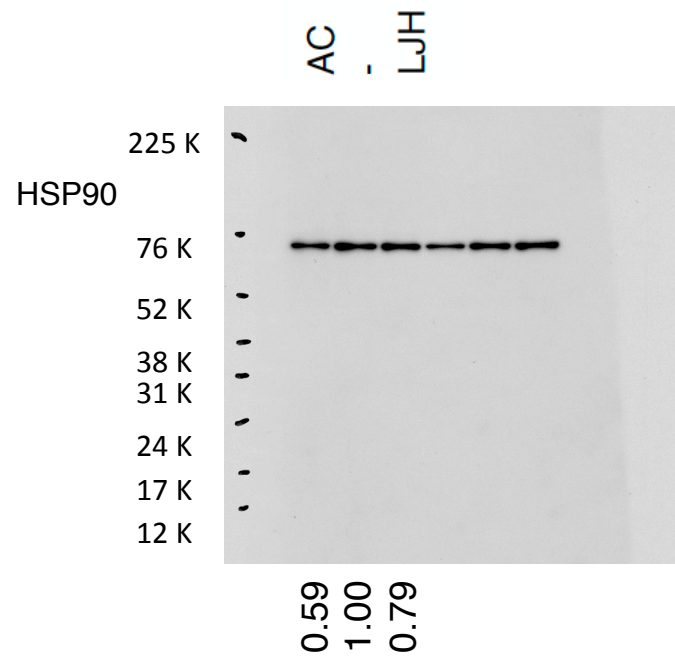

Figure 5D

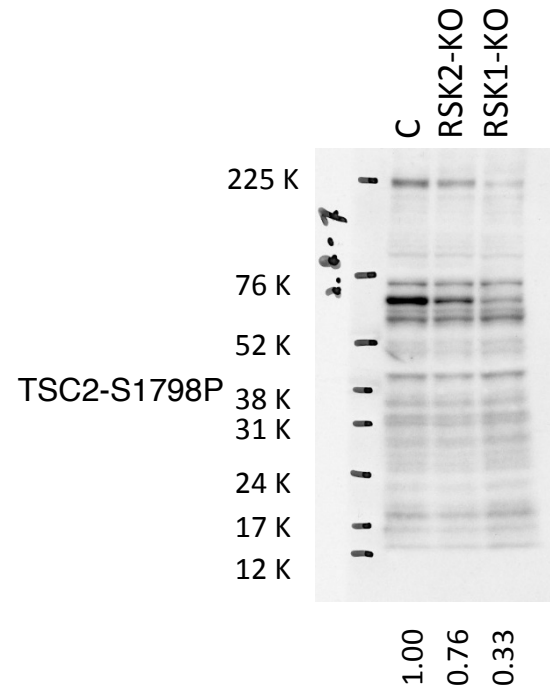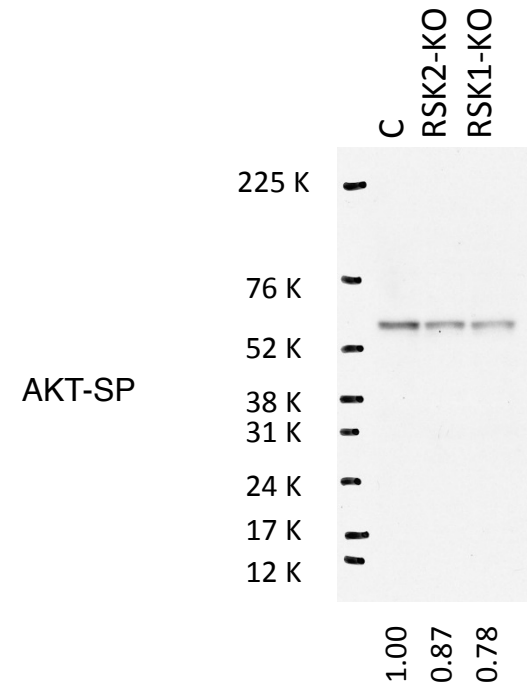

Figure 5D

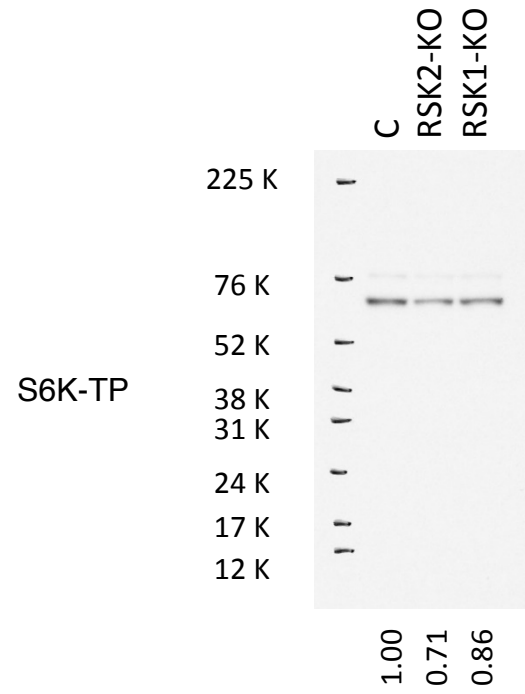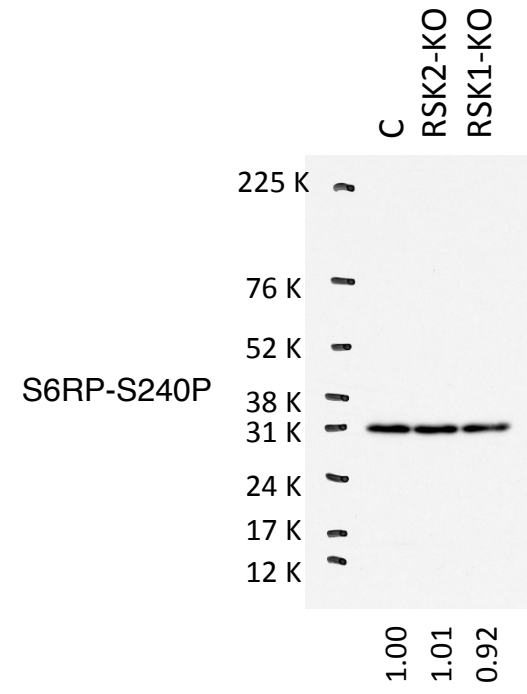

Figure 5D

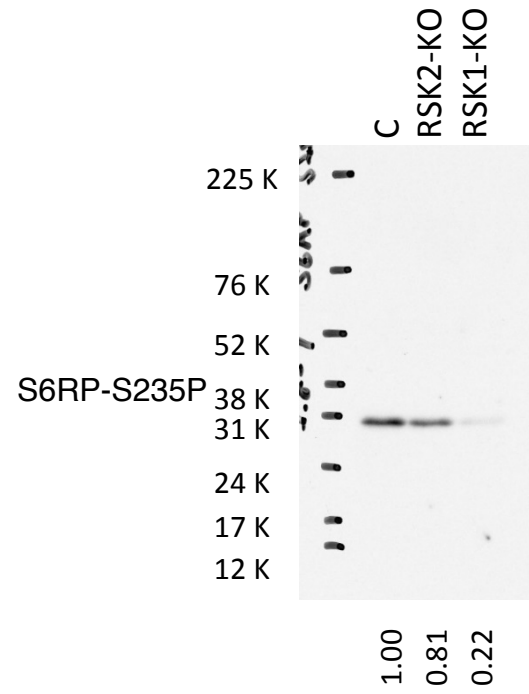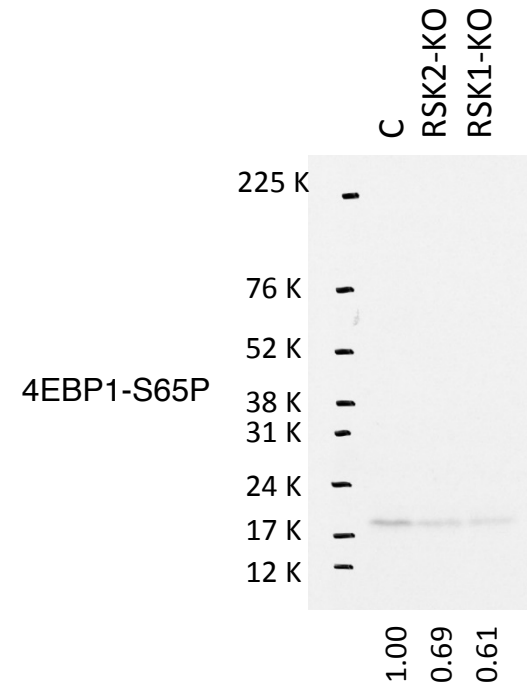

Figure 5D

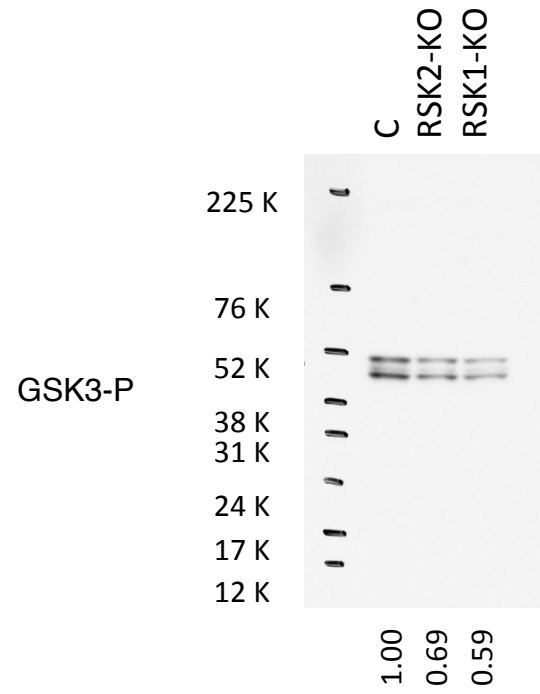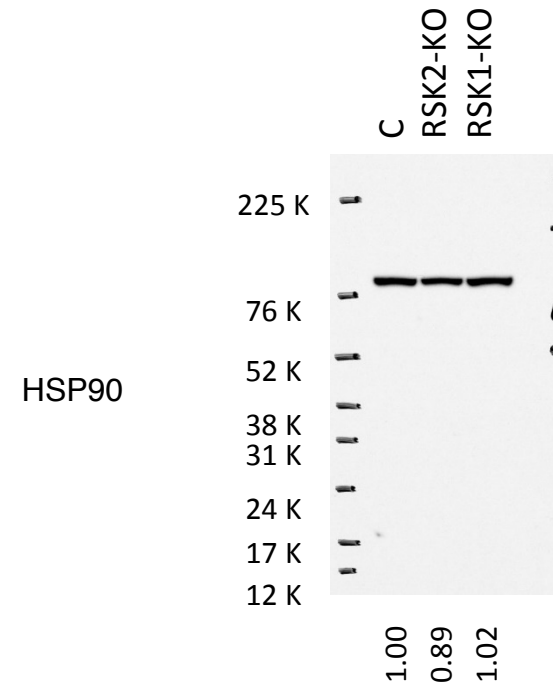

Figure 5D

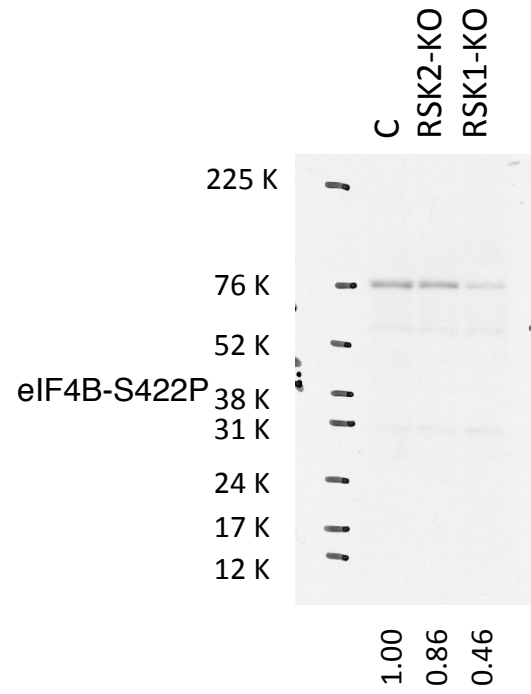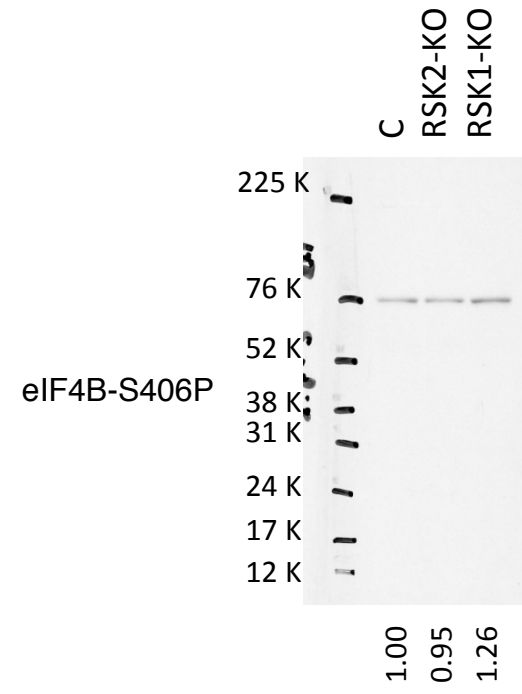

Figure 5D

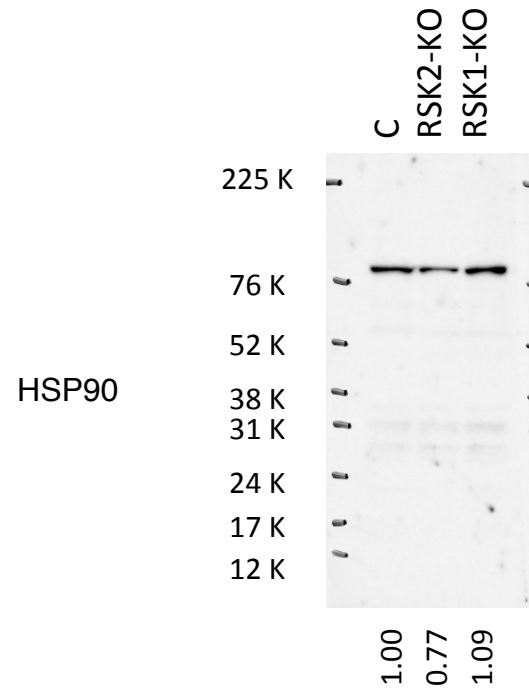

Figure 5E

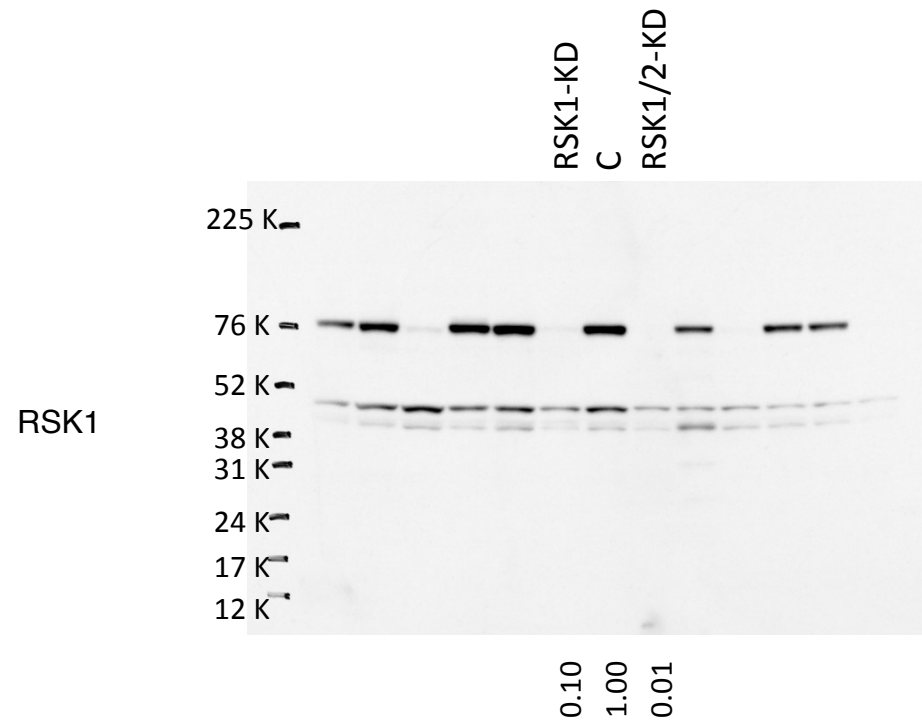

Figure 5E

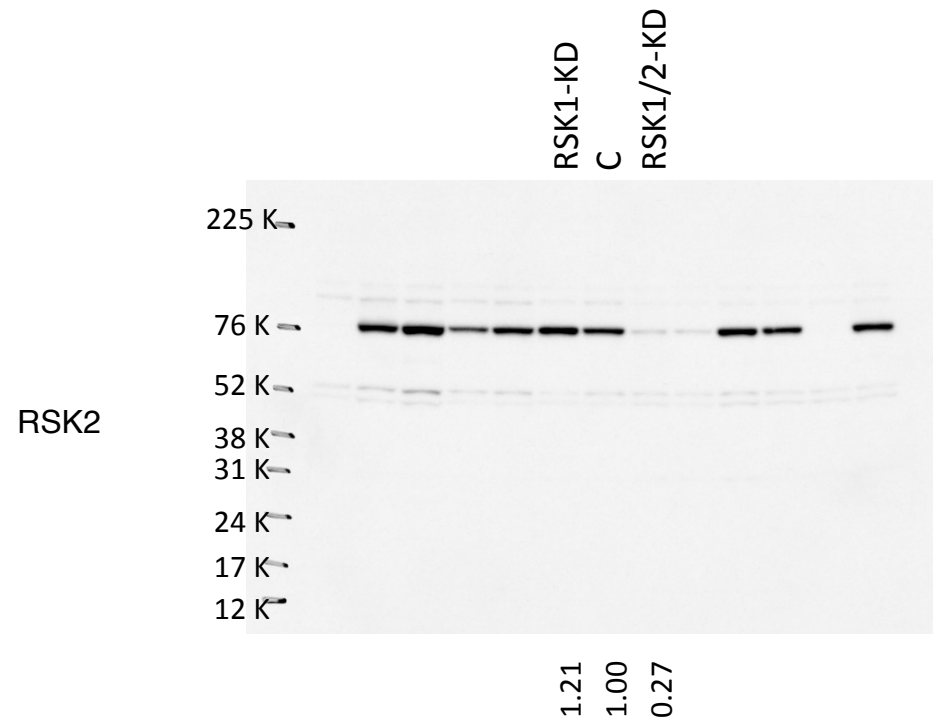

Figure 5E

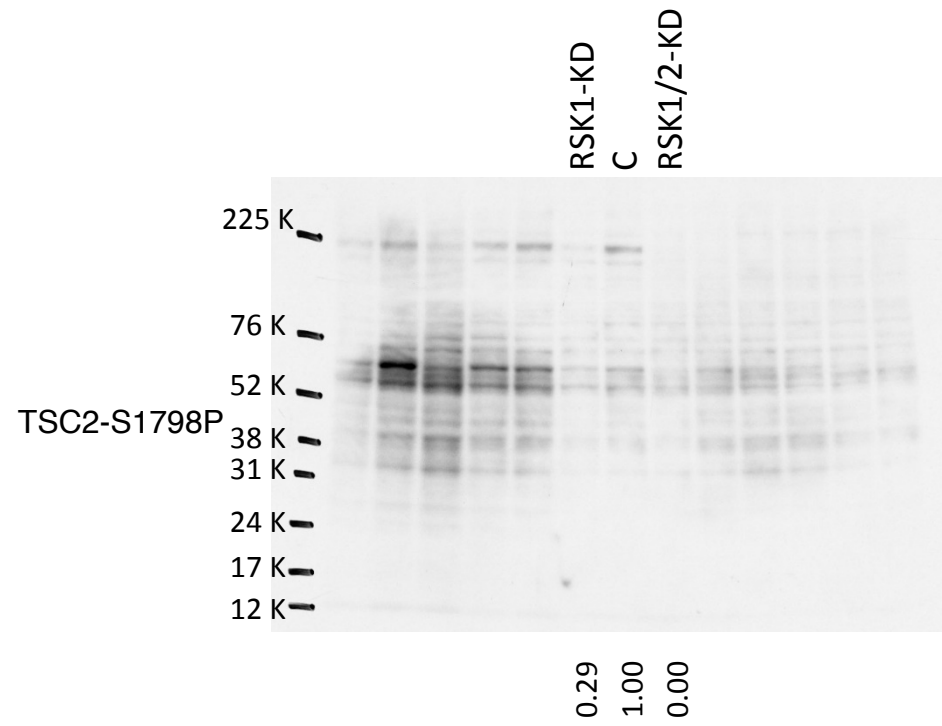

Figure 5E

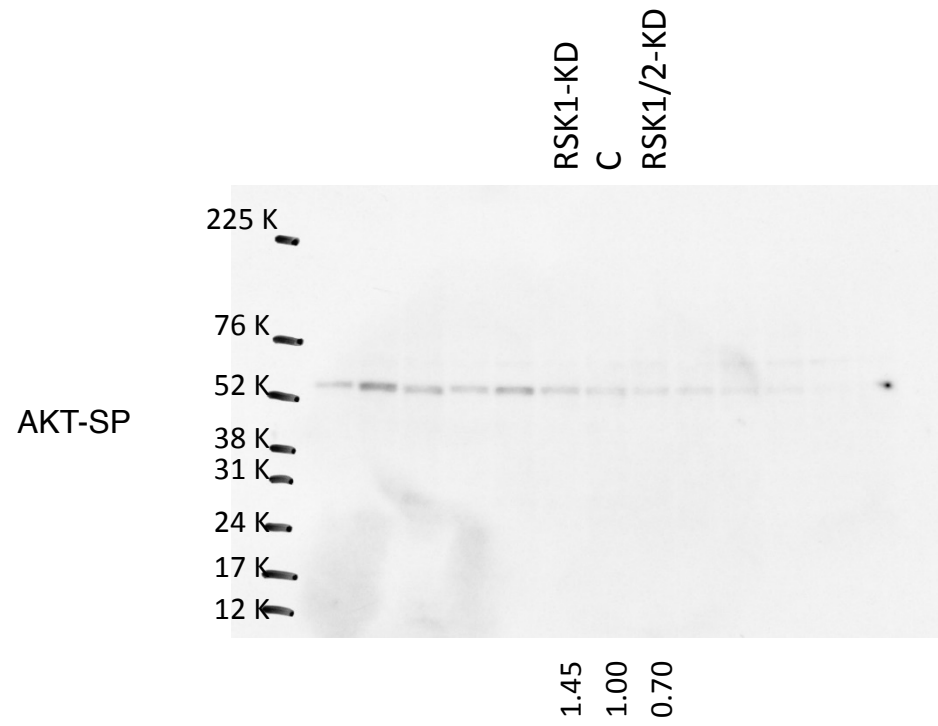

Figure 5E

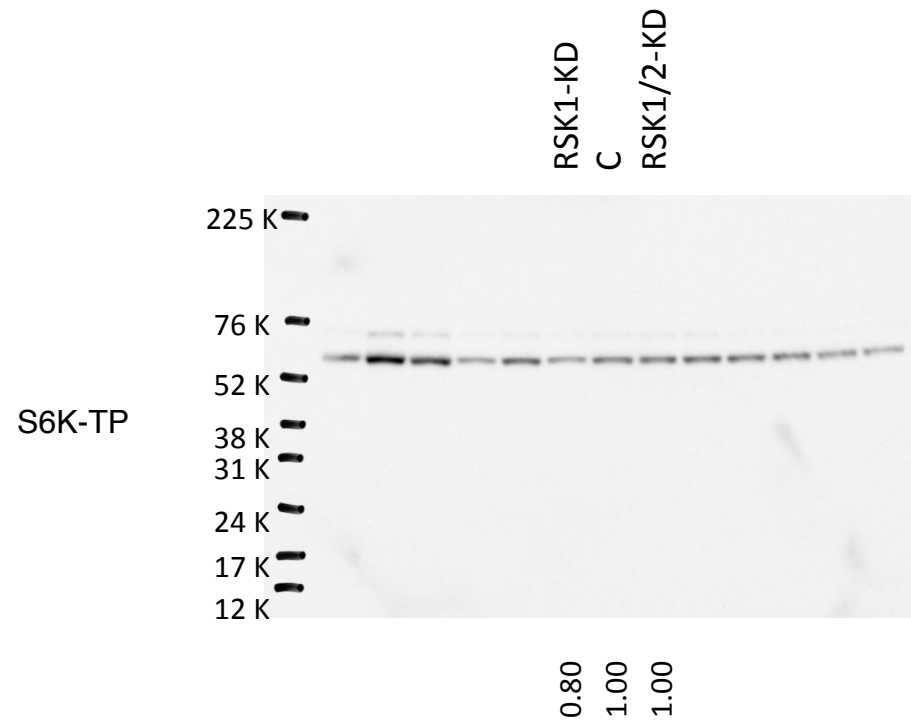

Figure 5E

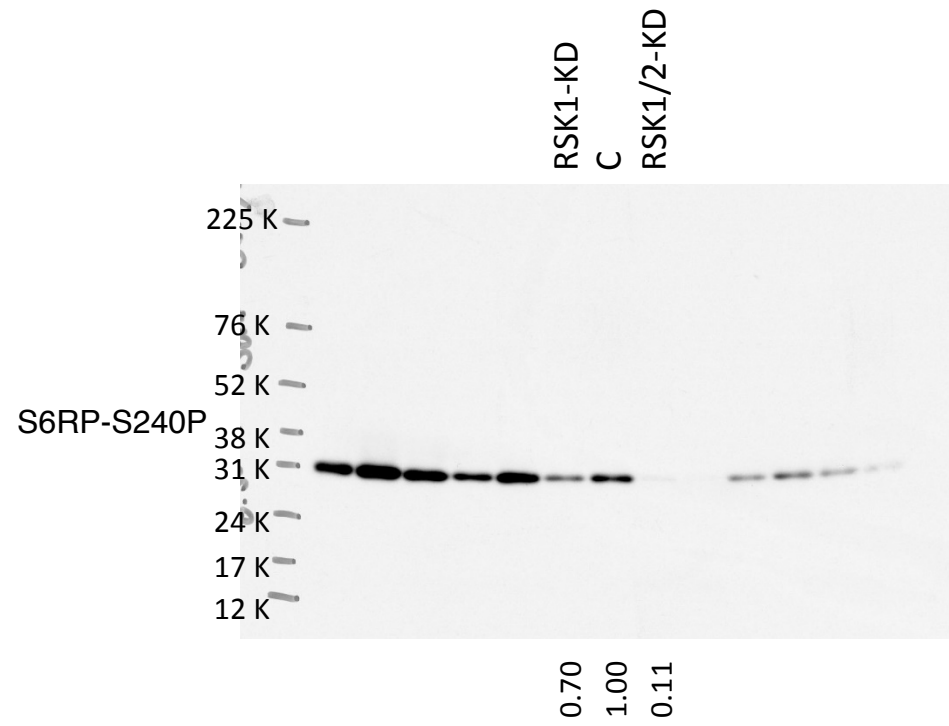

Figure 5E

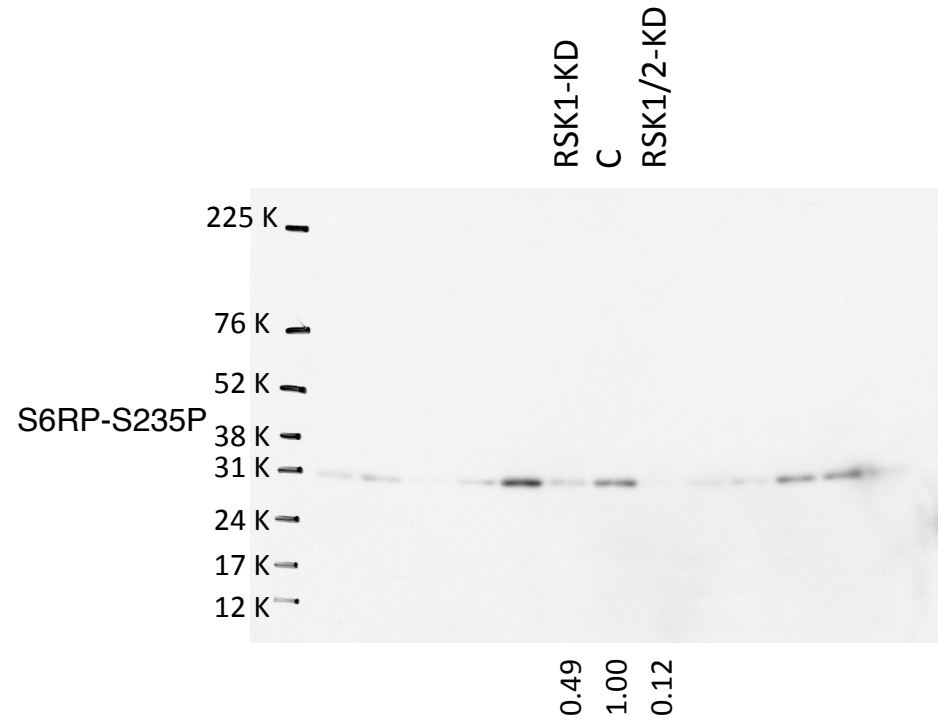

Figure 5E

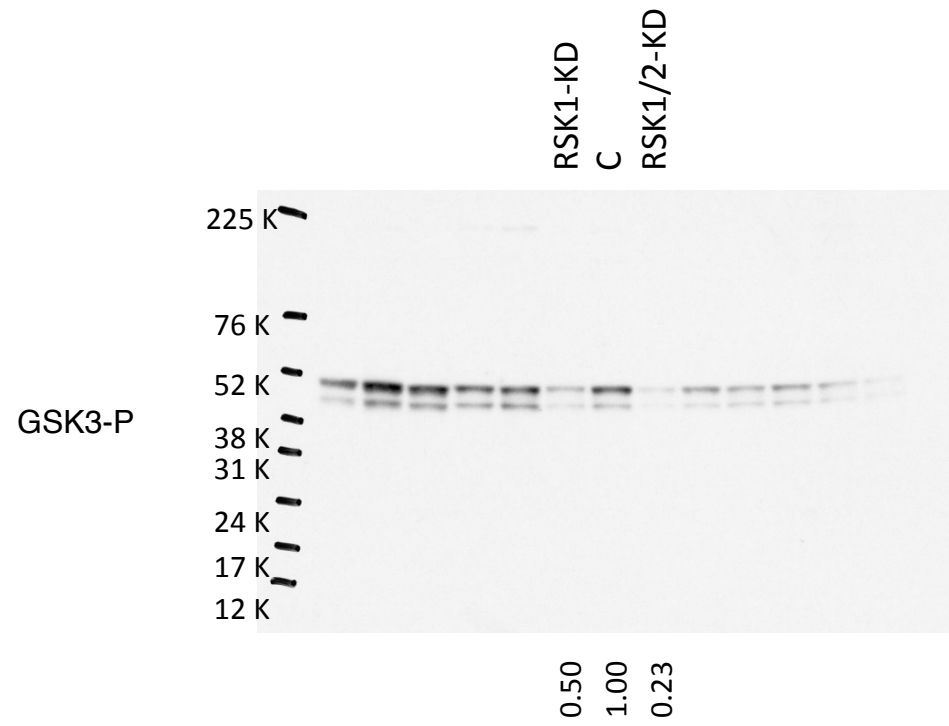

Figure 5E

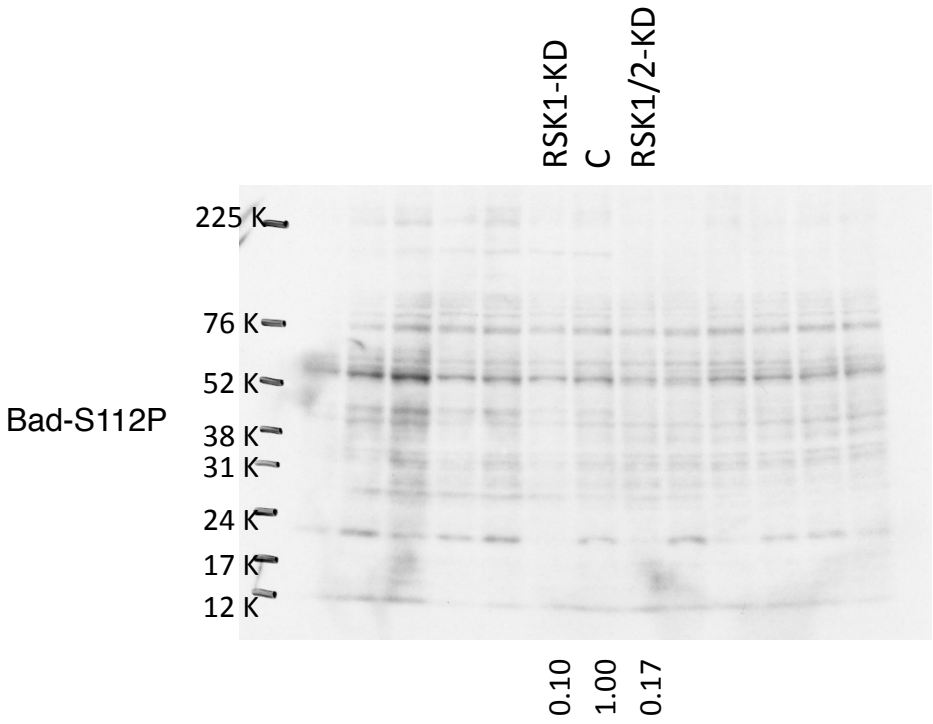

Figure 5E

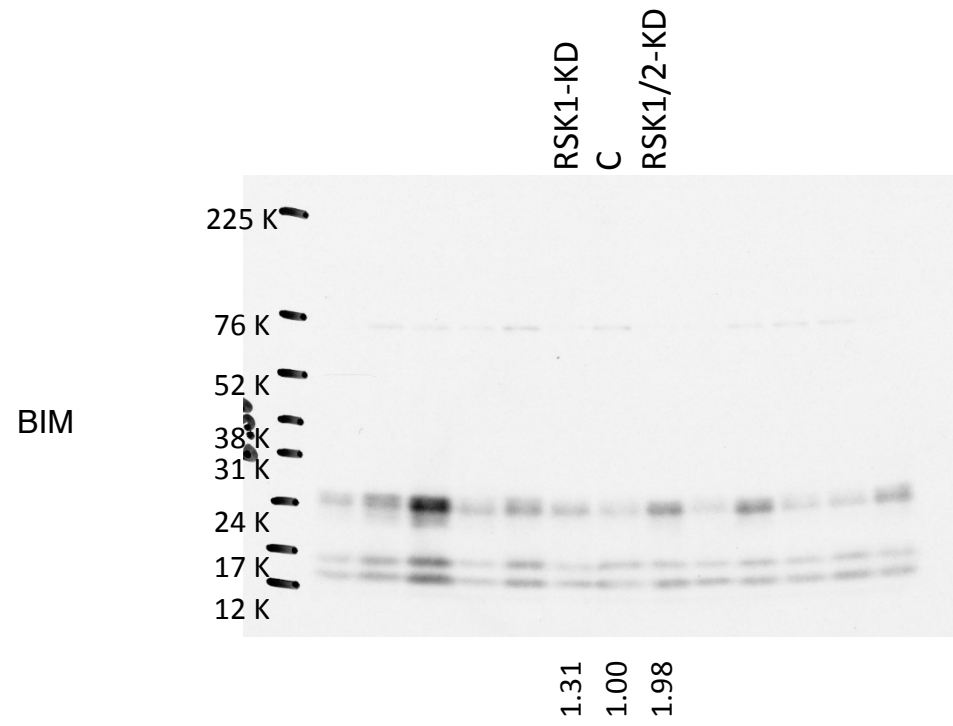

Figure 5E

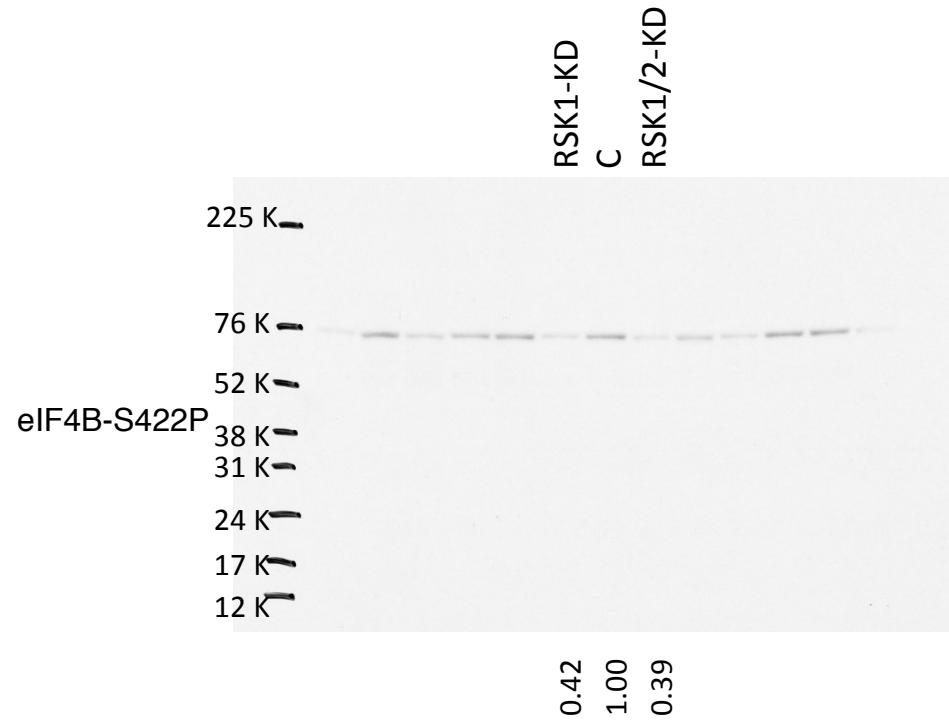

Figure 5E

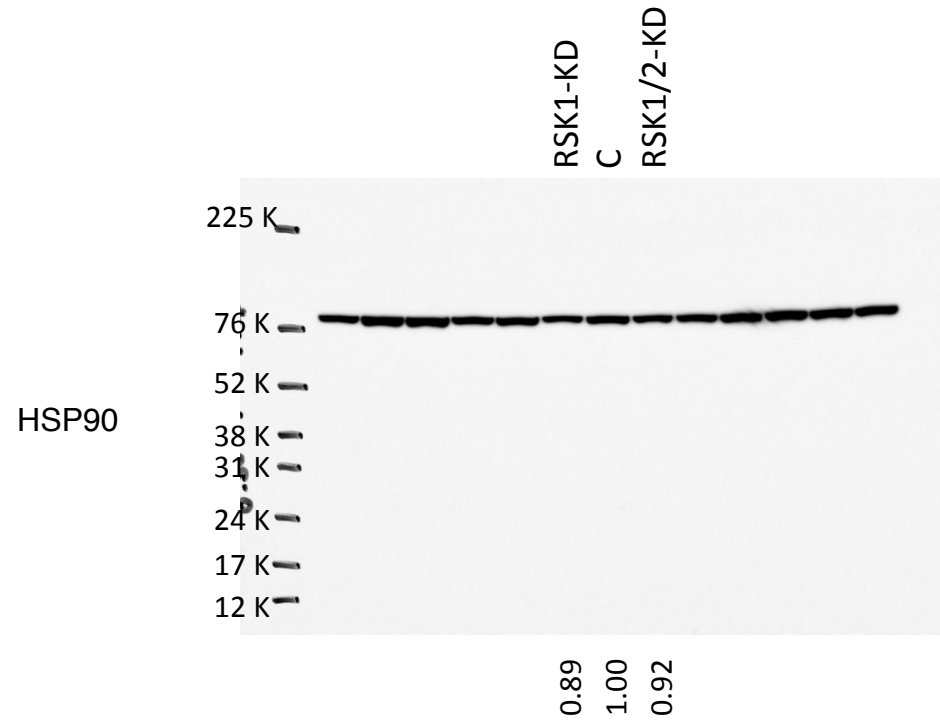

Figure 5F

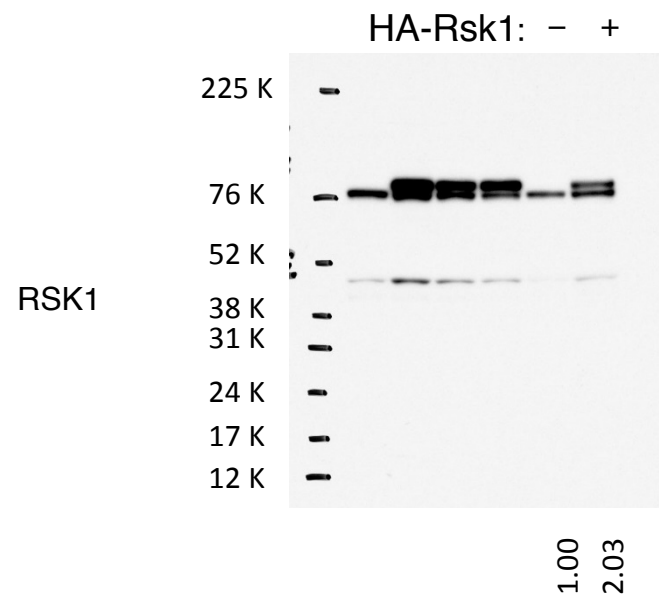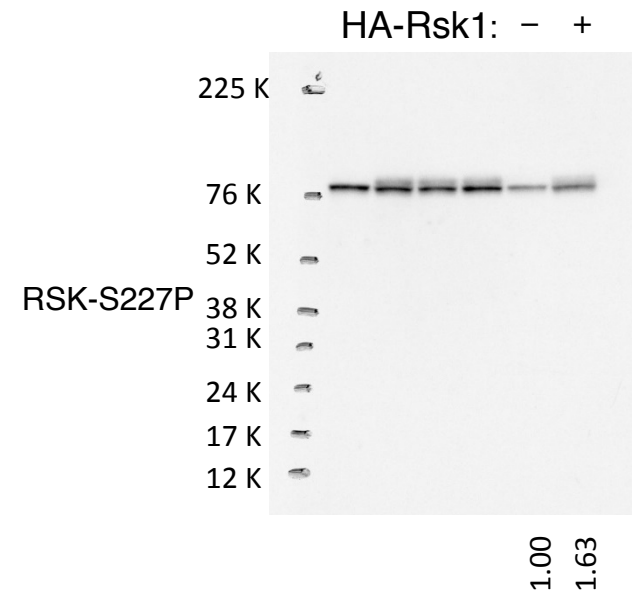

Figure 5F

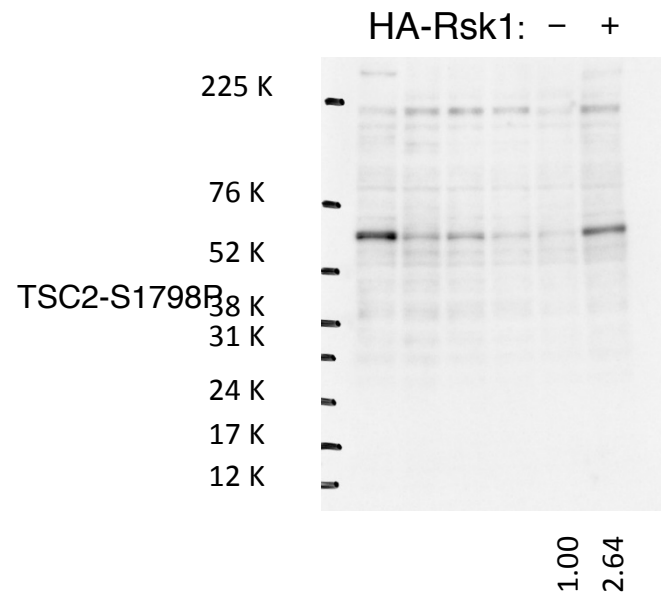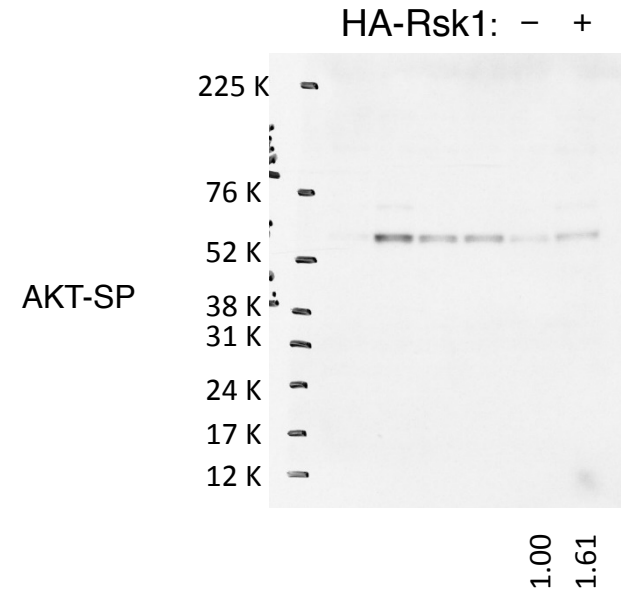

Figure 5F

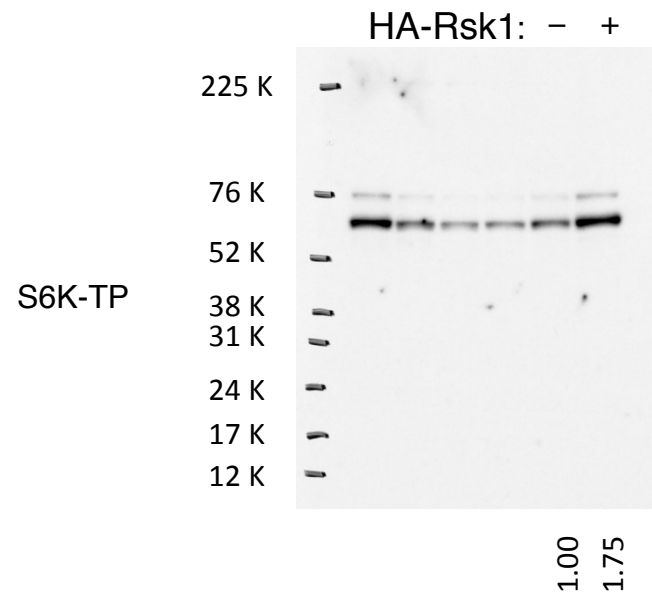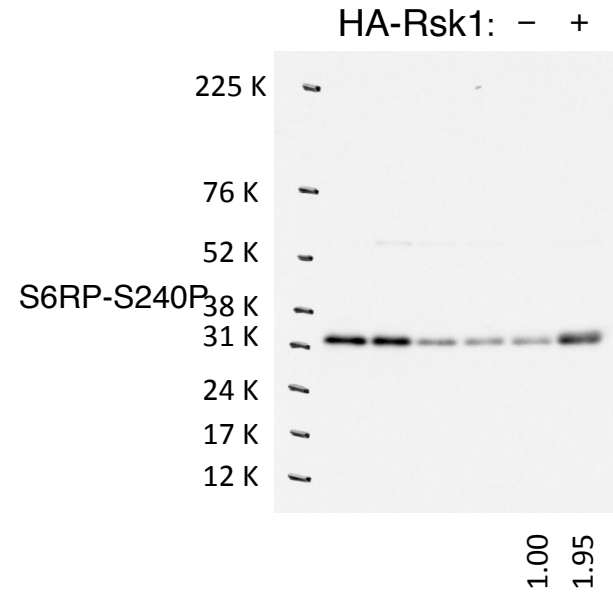

Figure 5F

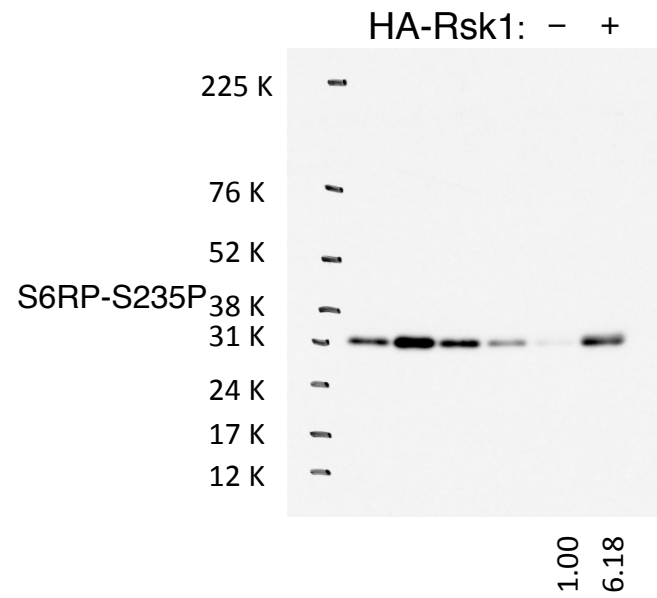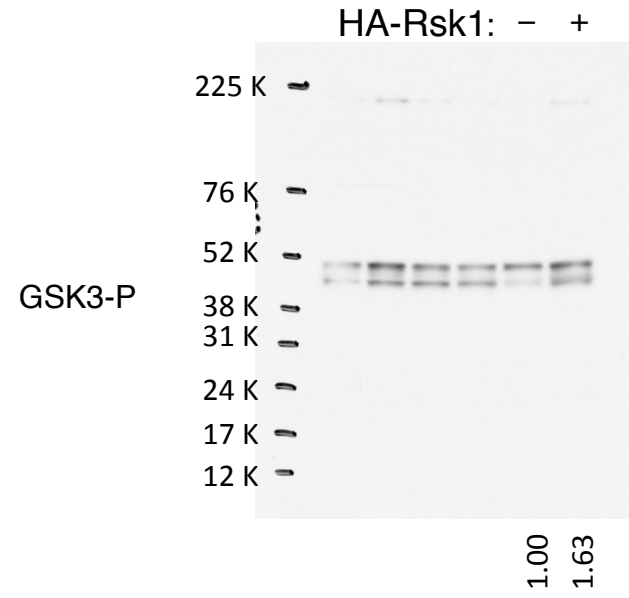

Figure 5F

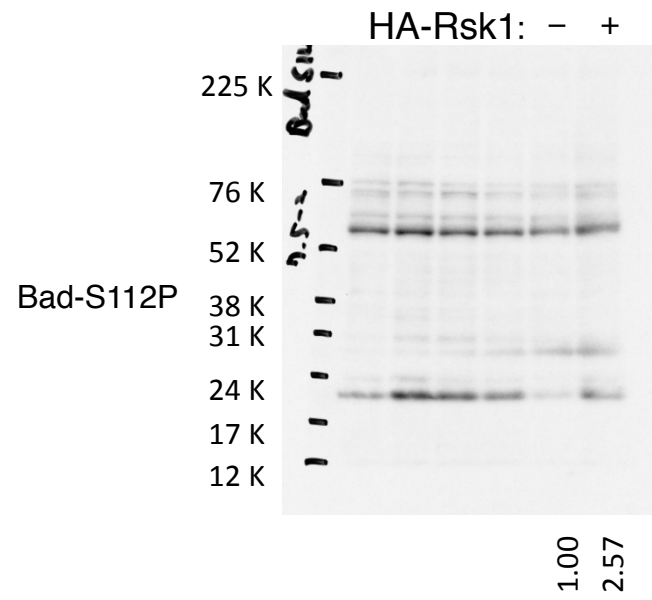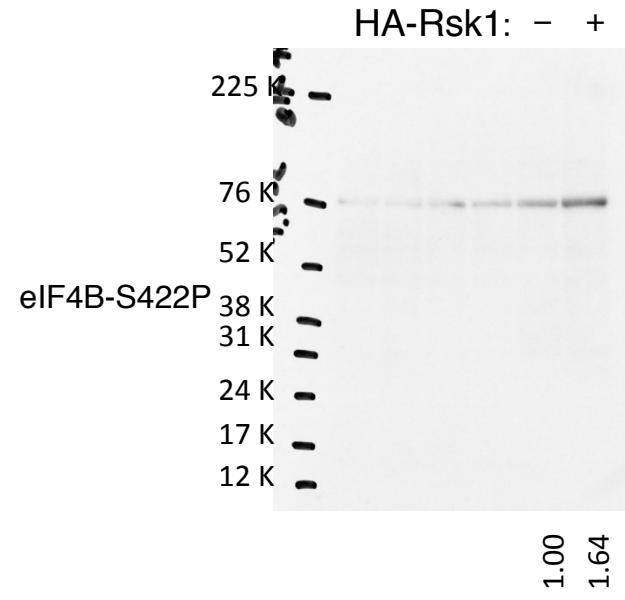

Figure 5F

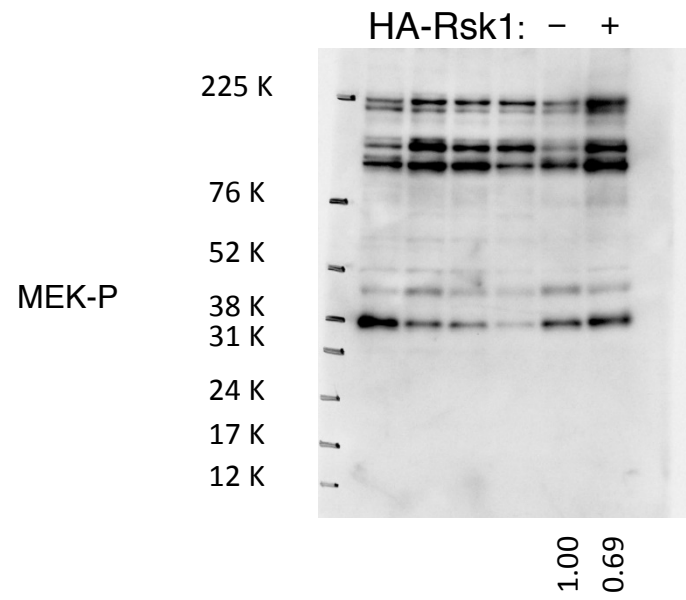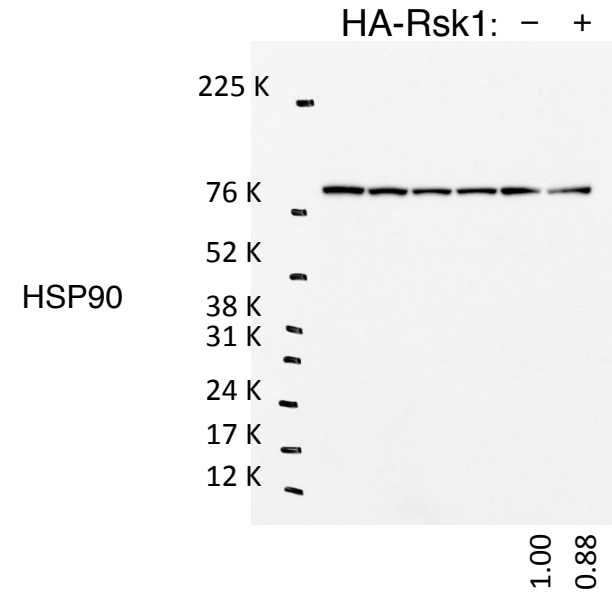

Figure 5G

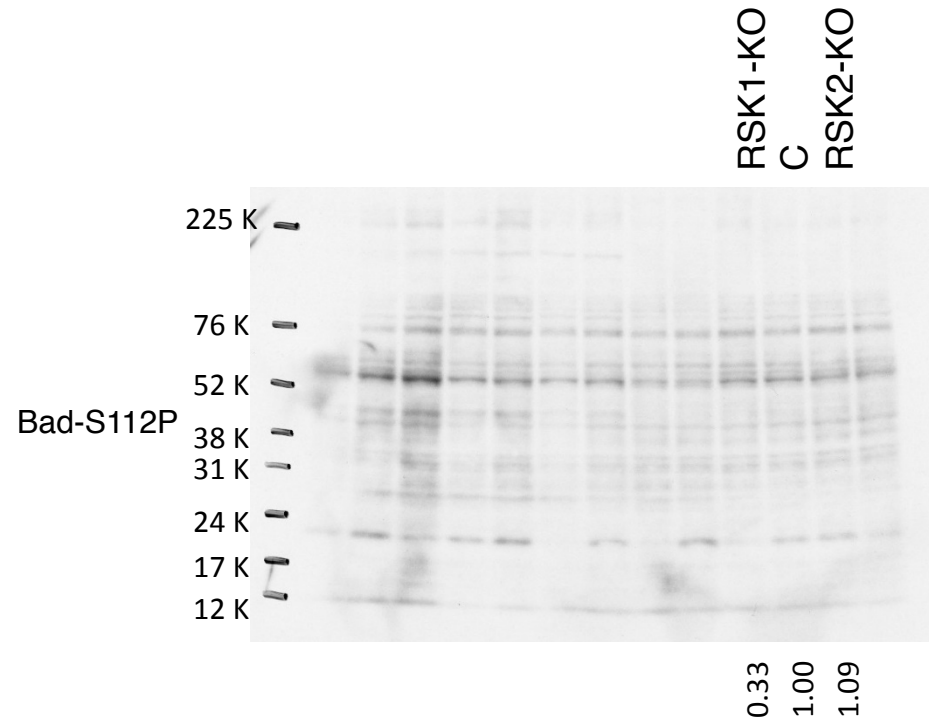

Figure 5G

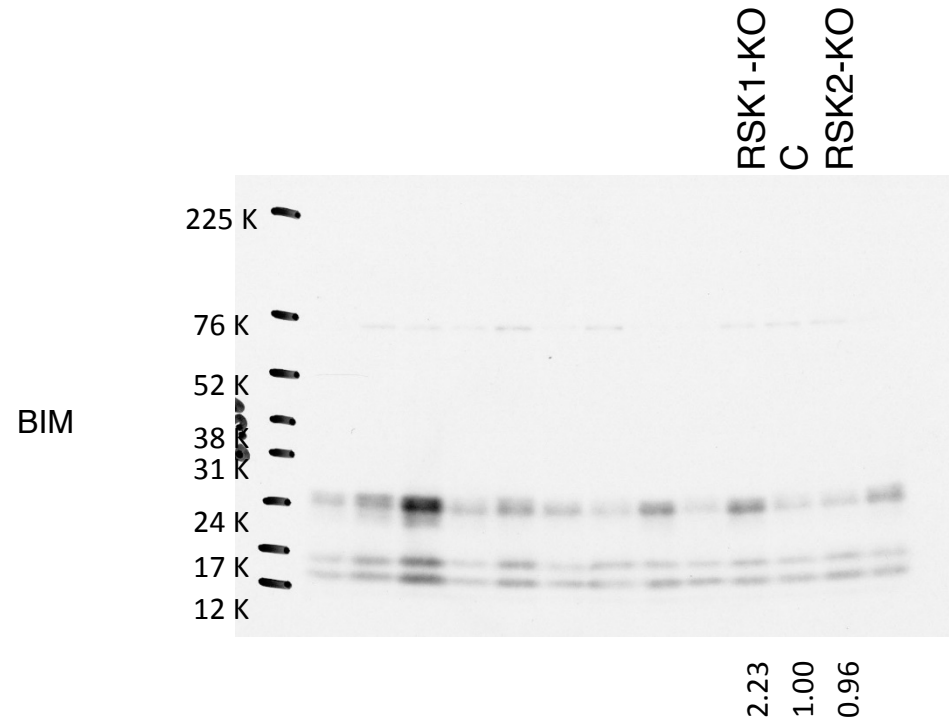

Figure 5G

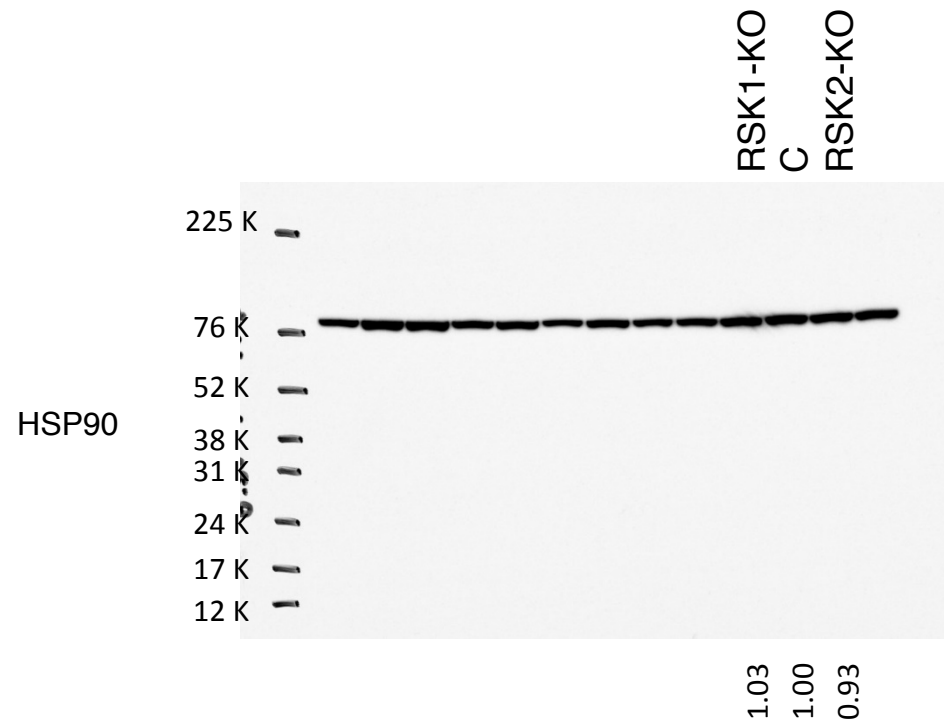

Figure 5H

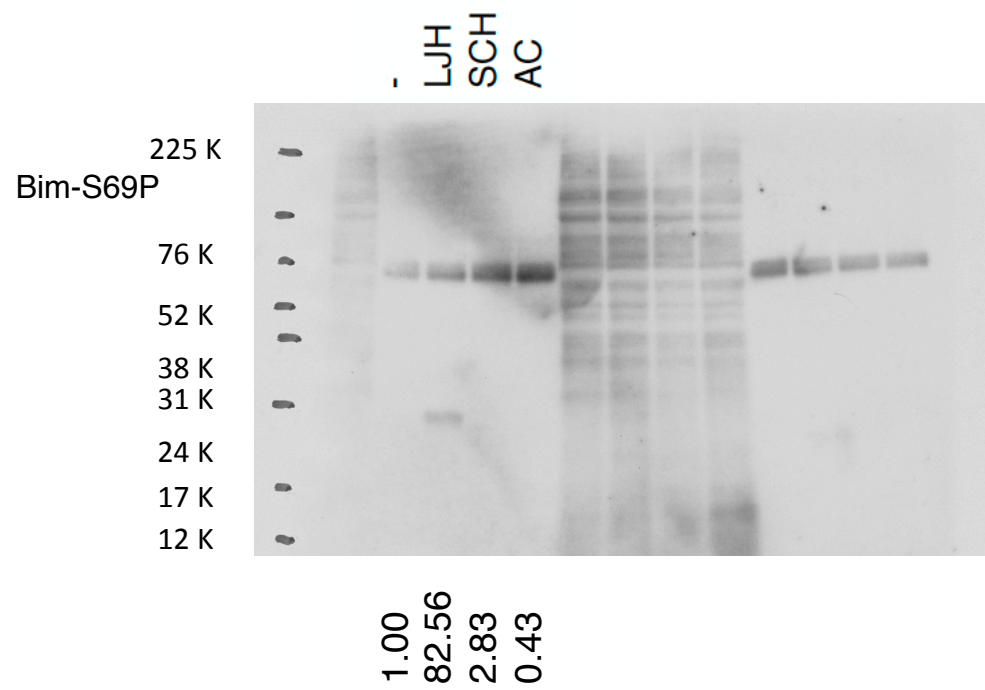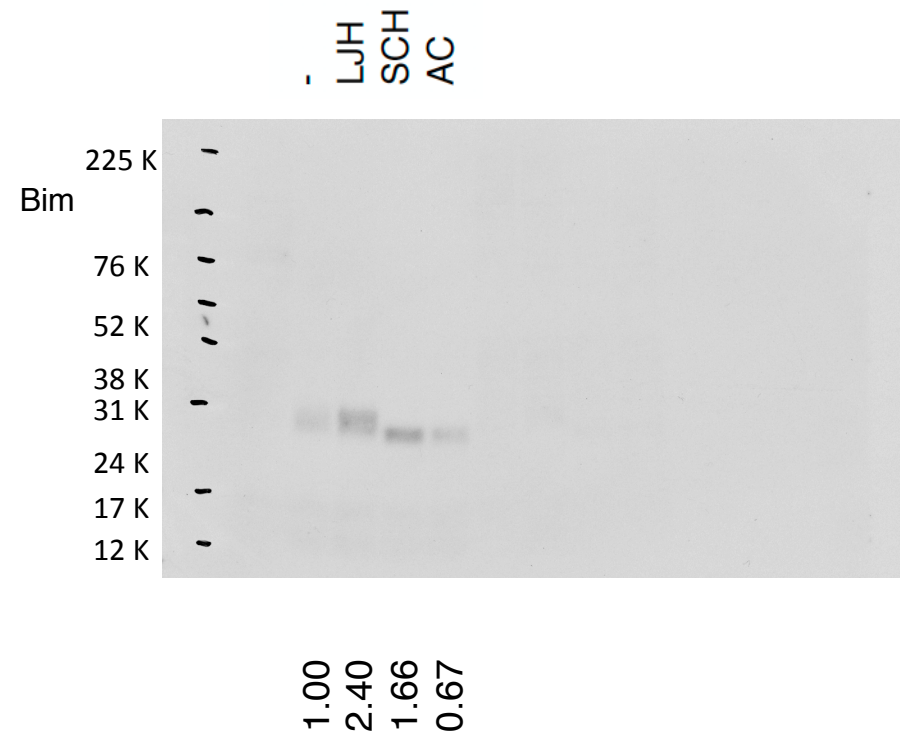

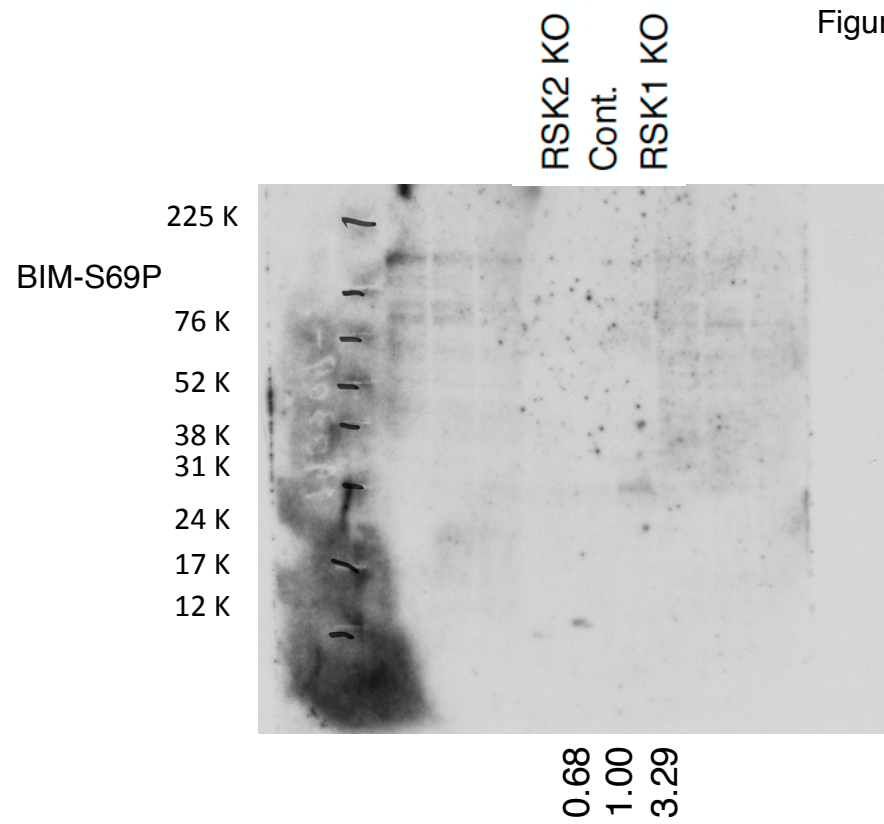

Figure 5I

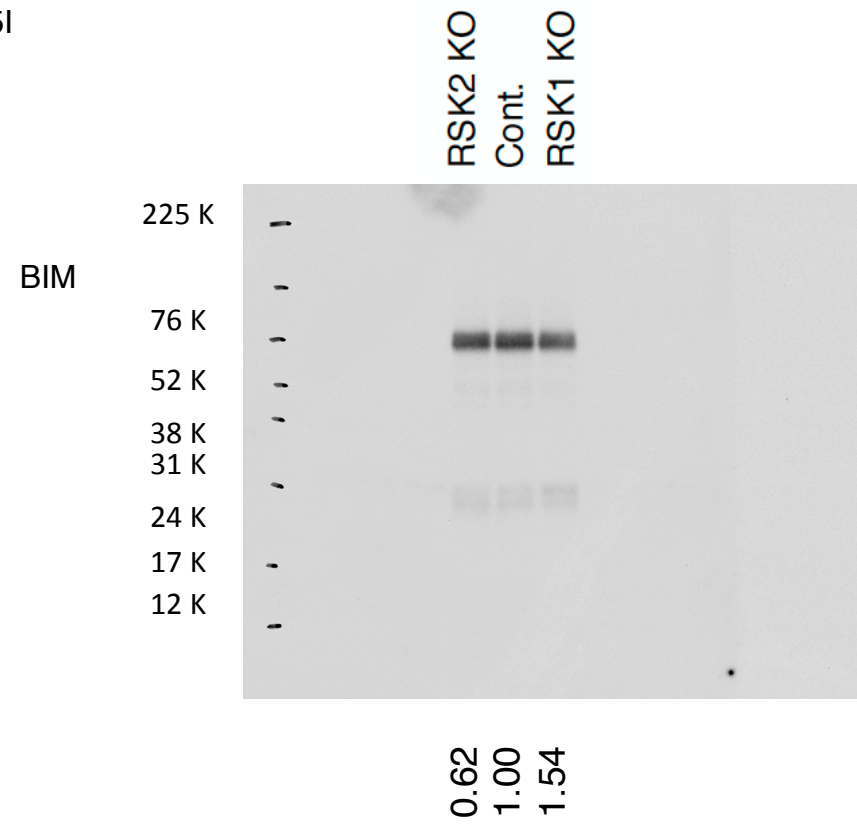

Figure 5J

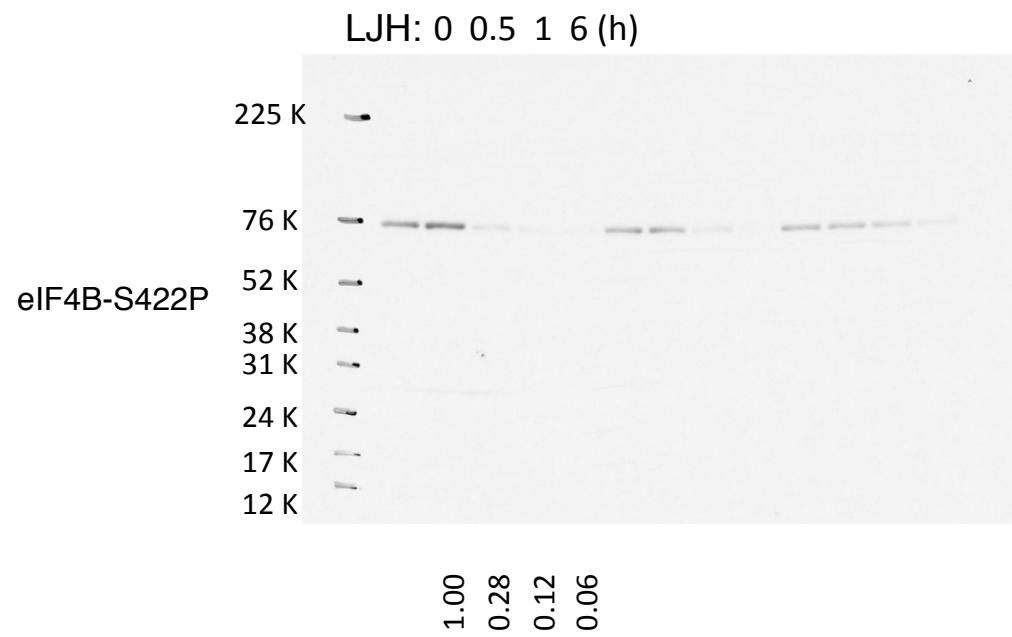

Figure 5J

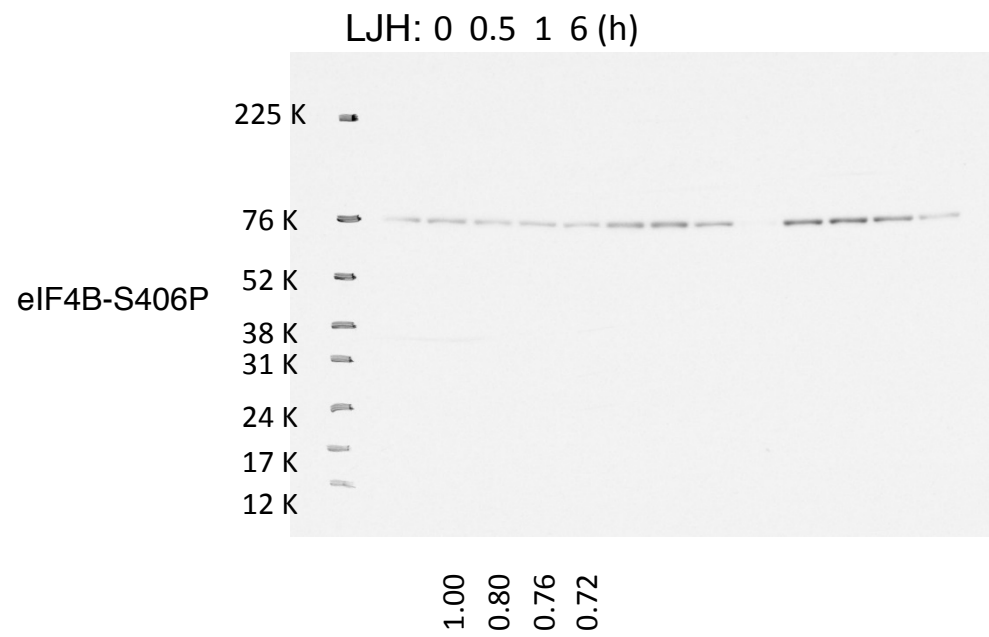

Figure 5J

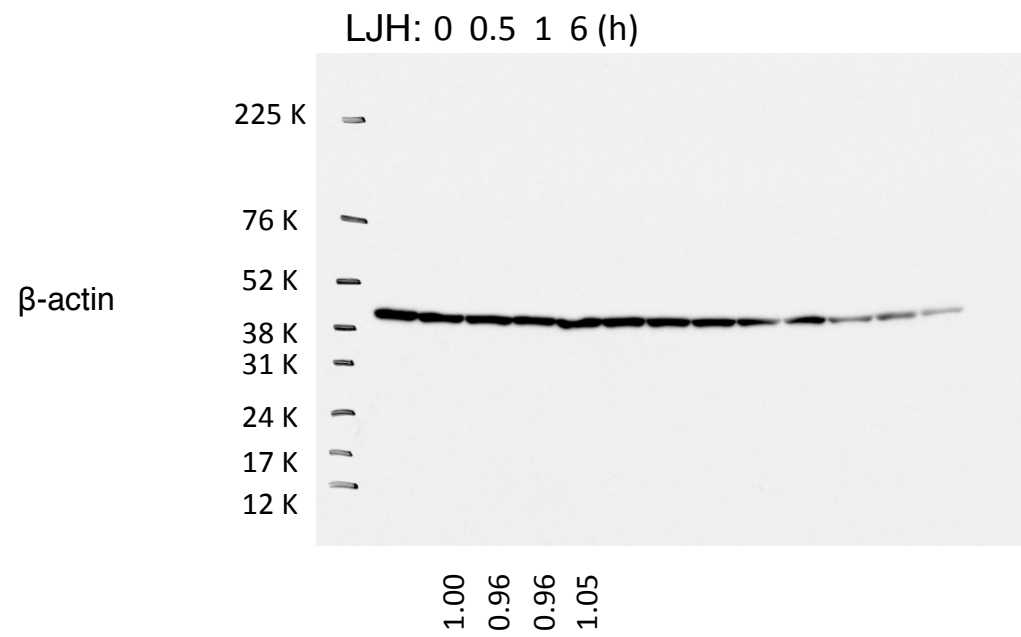

Figure 5K

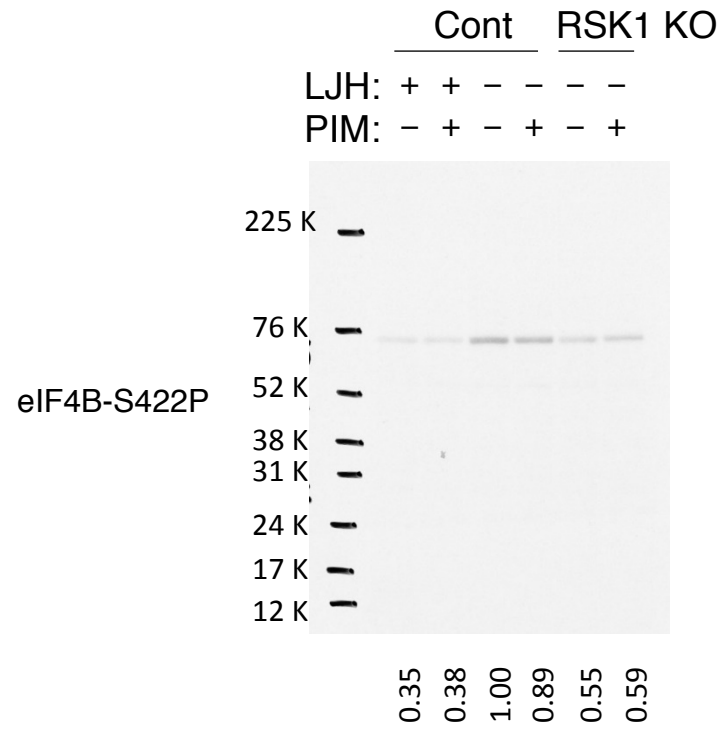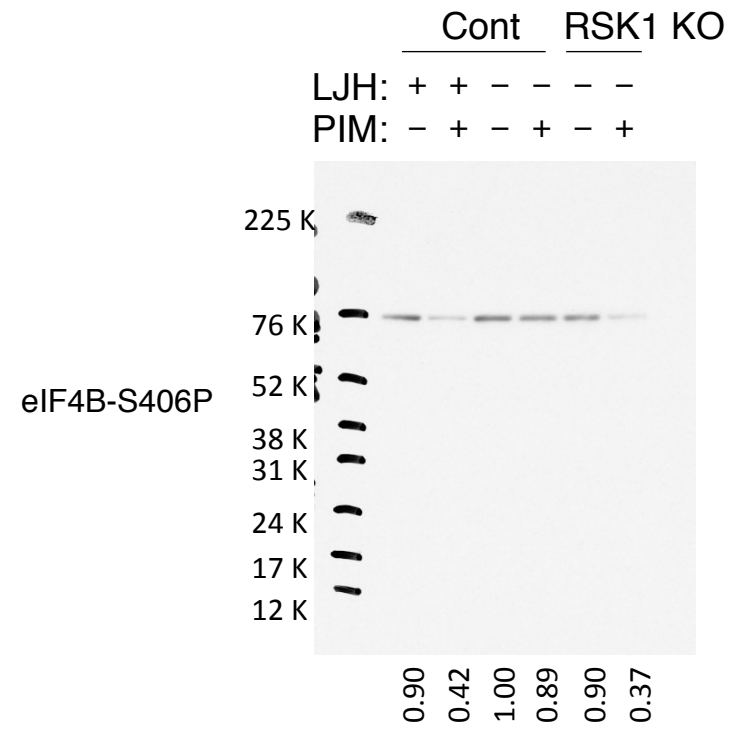

Figure 5K

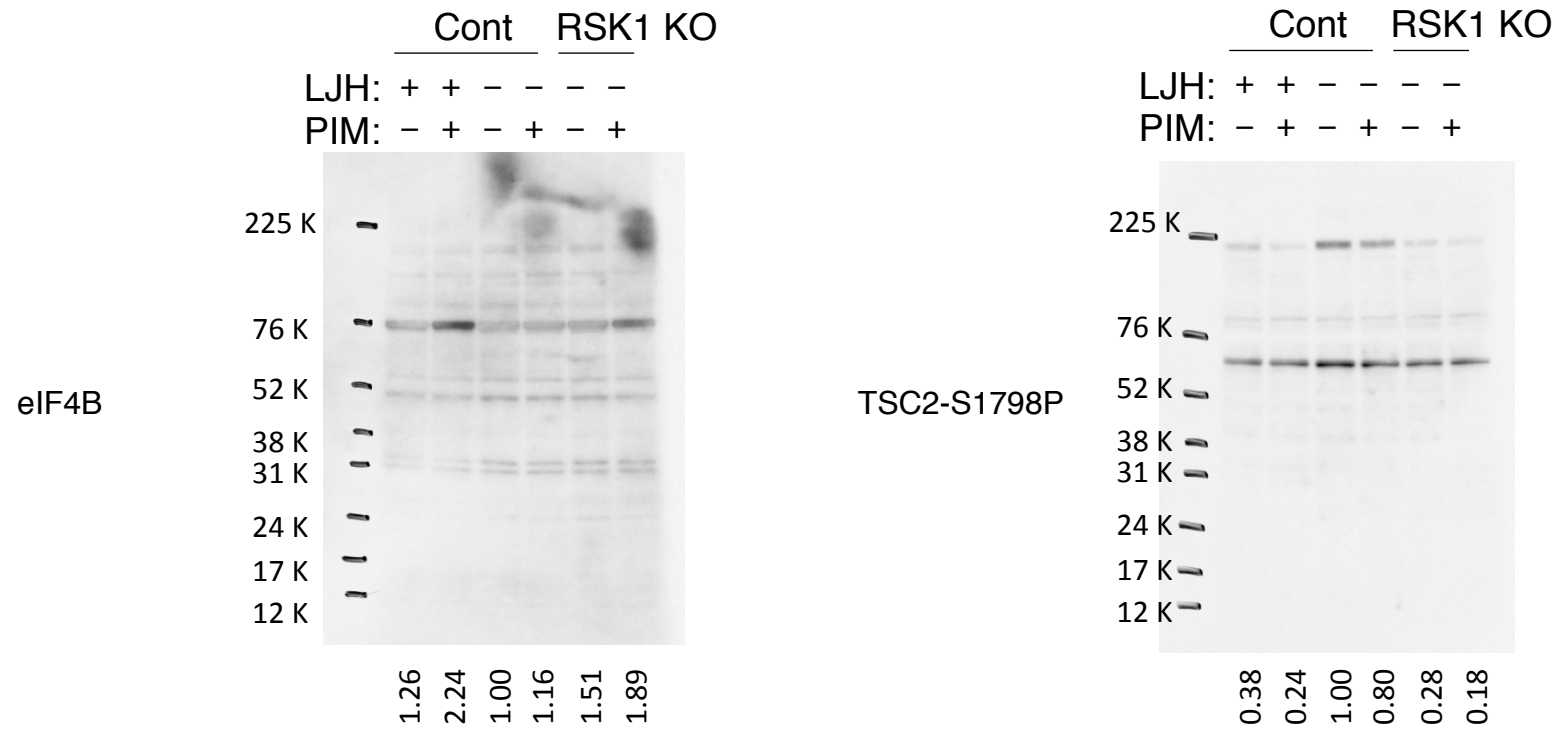

Figure 5K

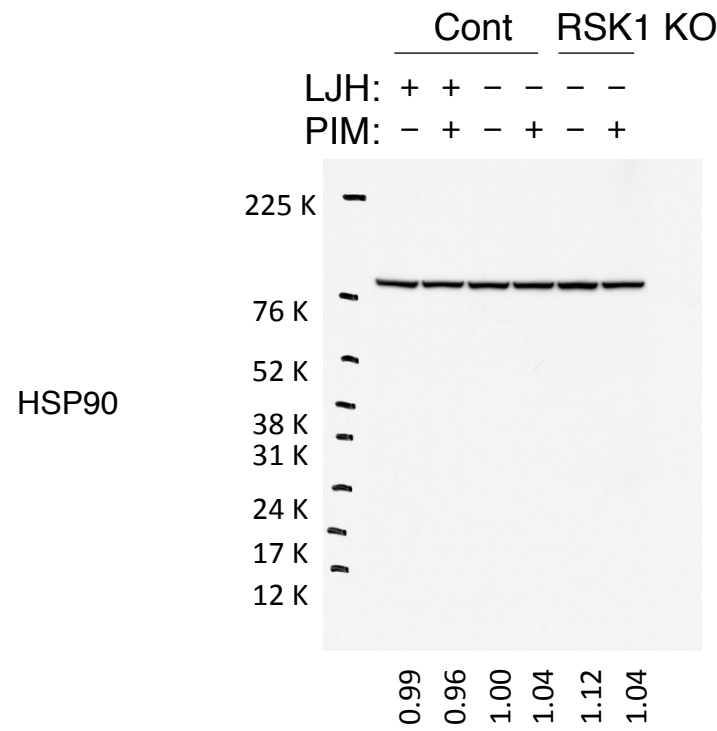

Figure 5L

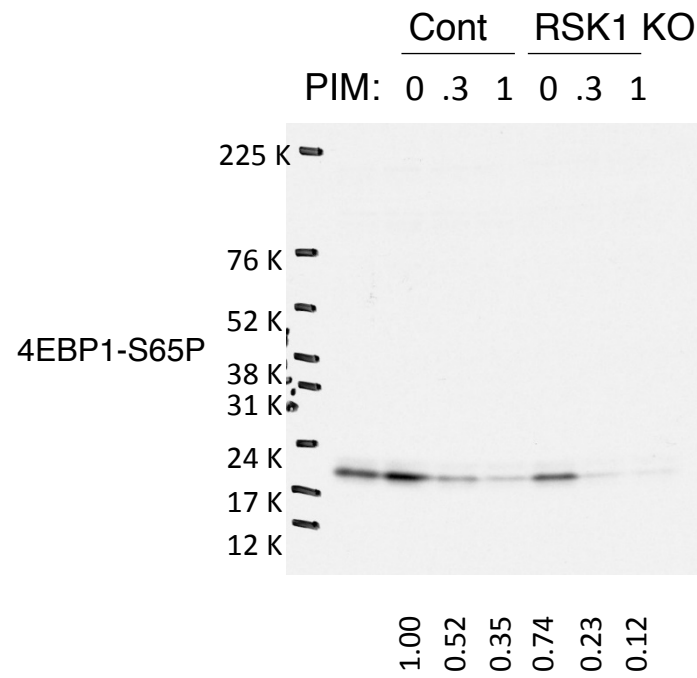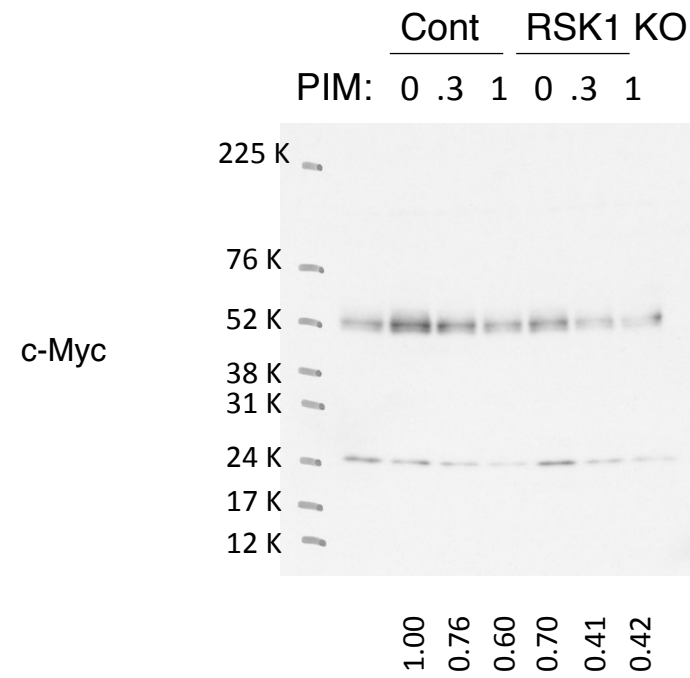

Figure 5L

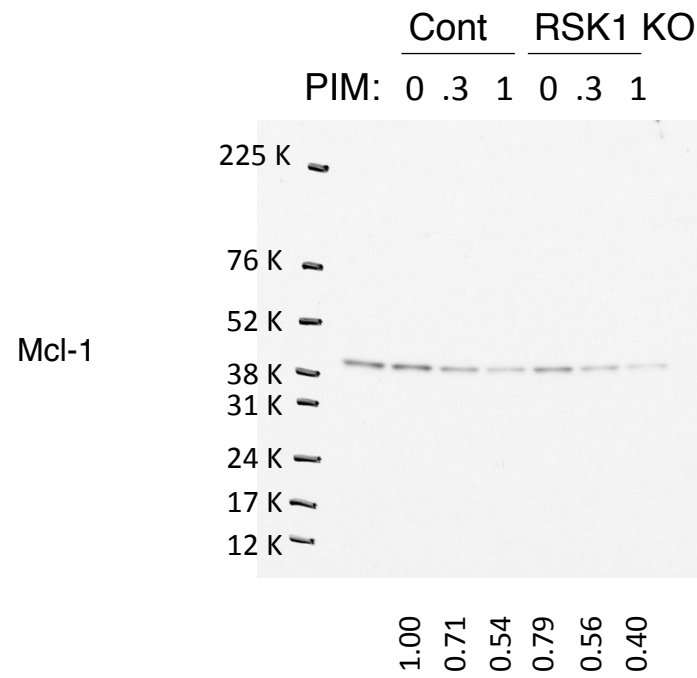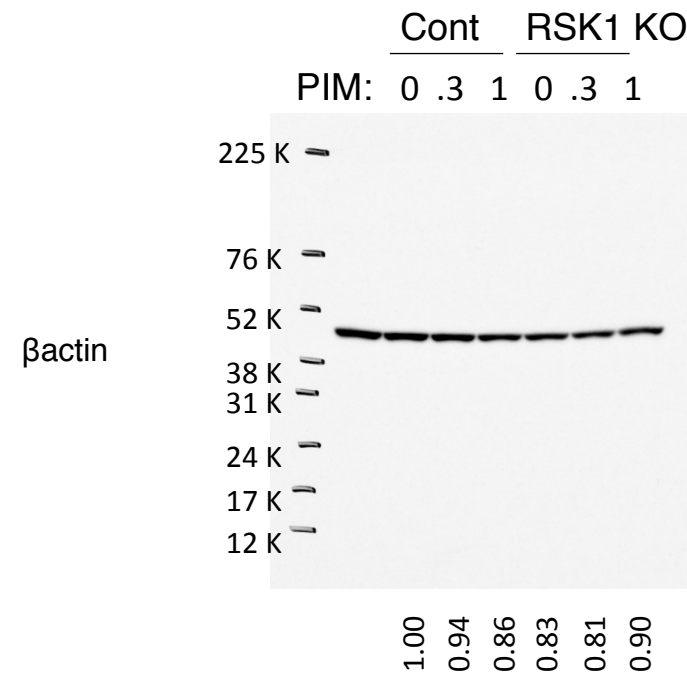

Figure 6A

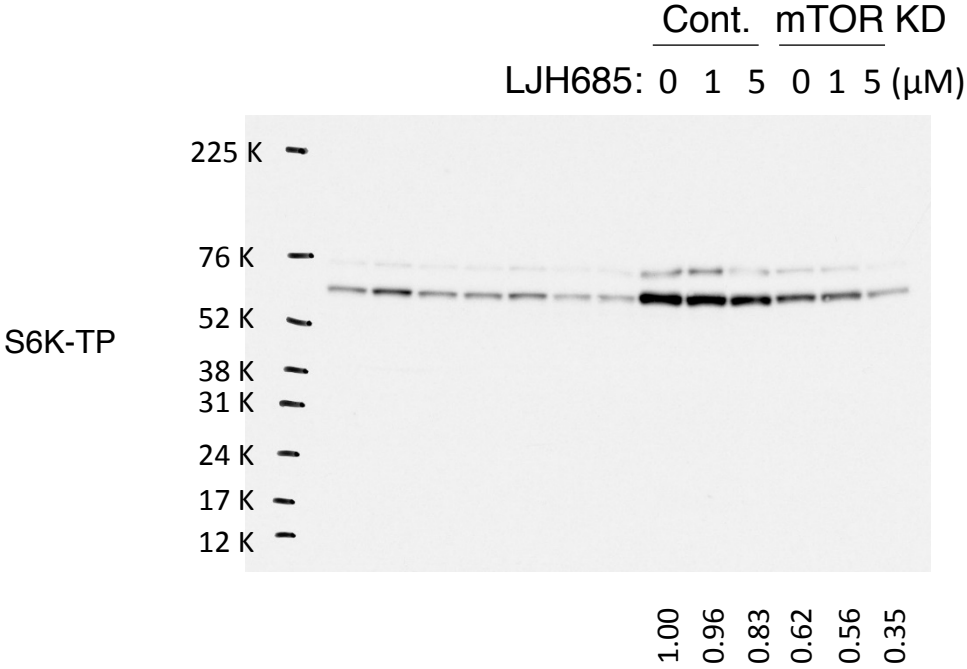

Figure 6A

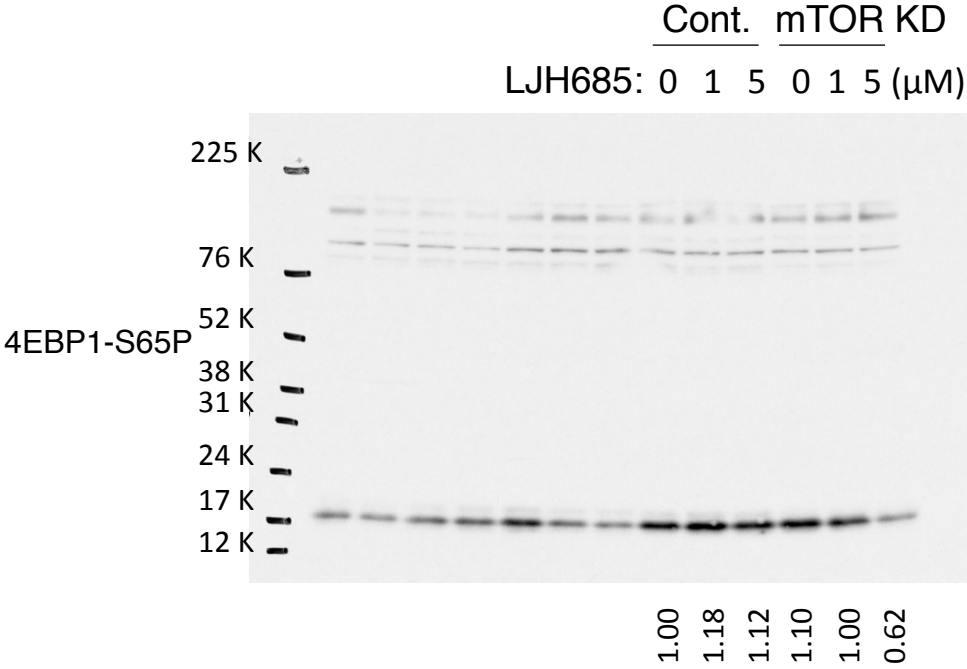

Figure 6A

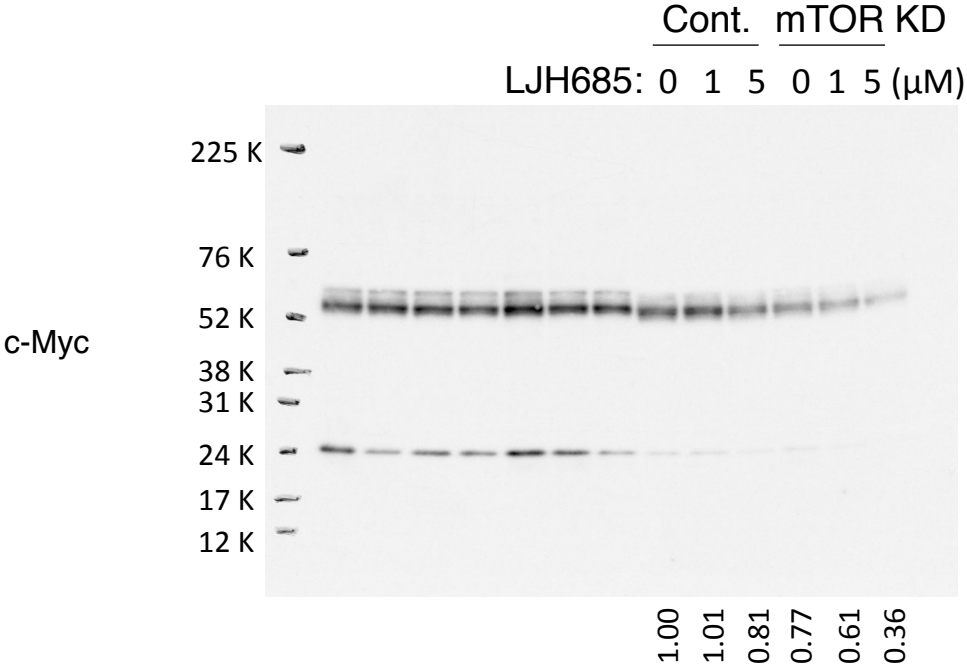

Figure 6A

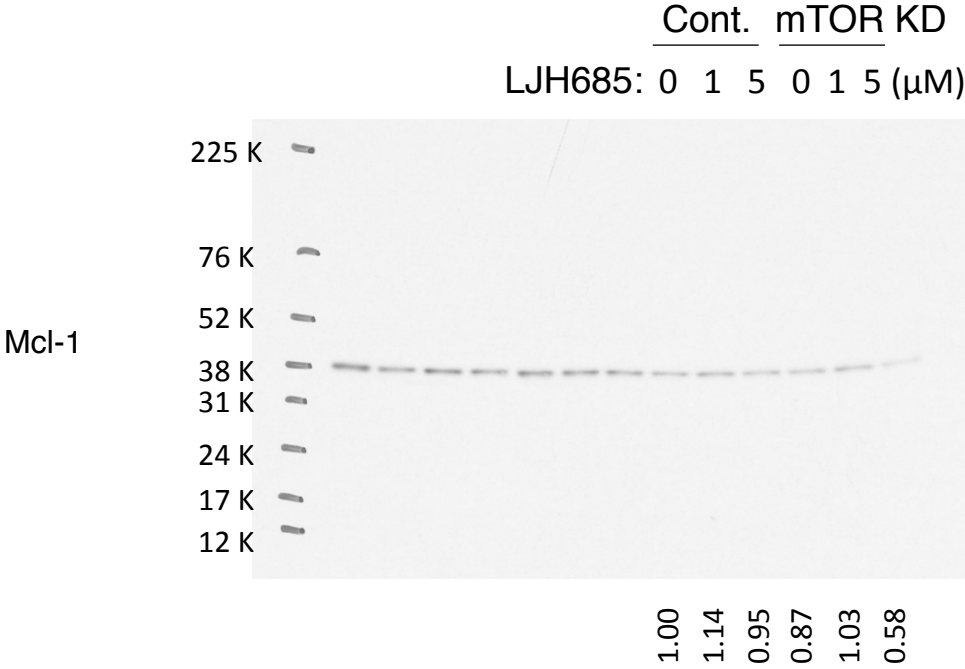

Figure 6A

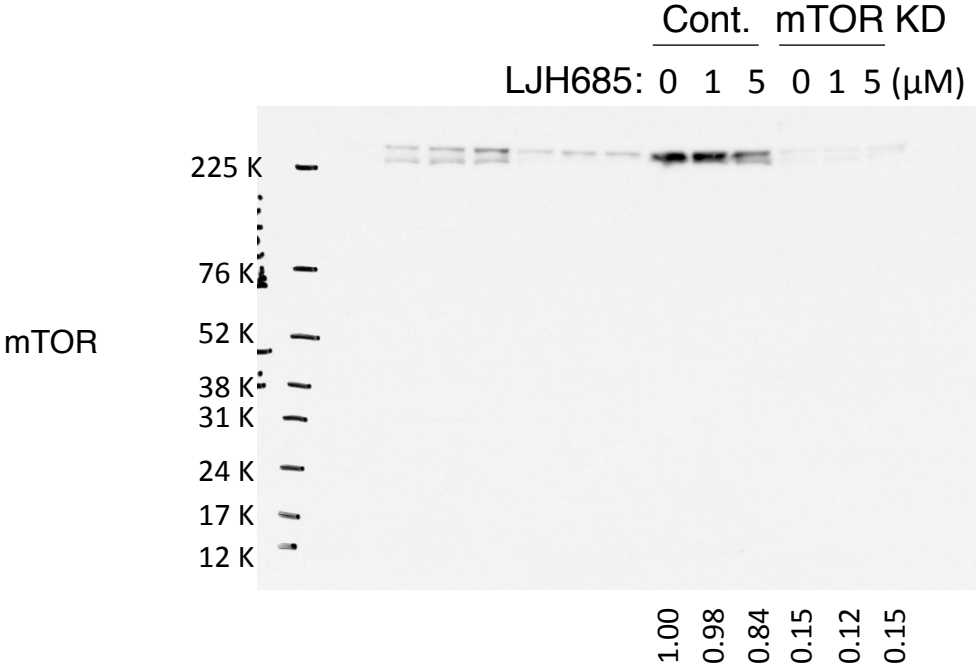

Figure 6A

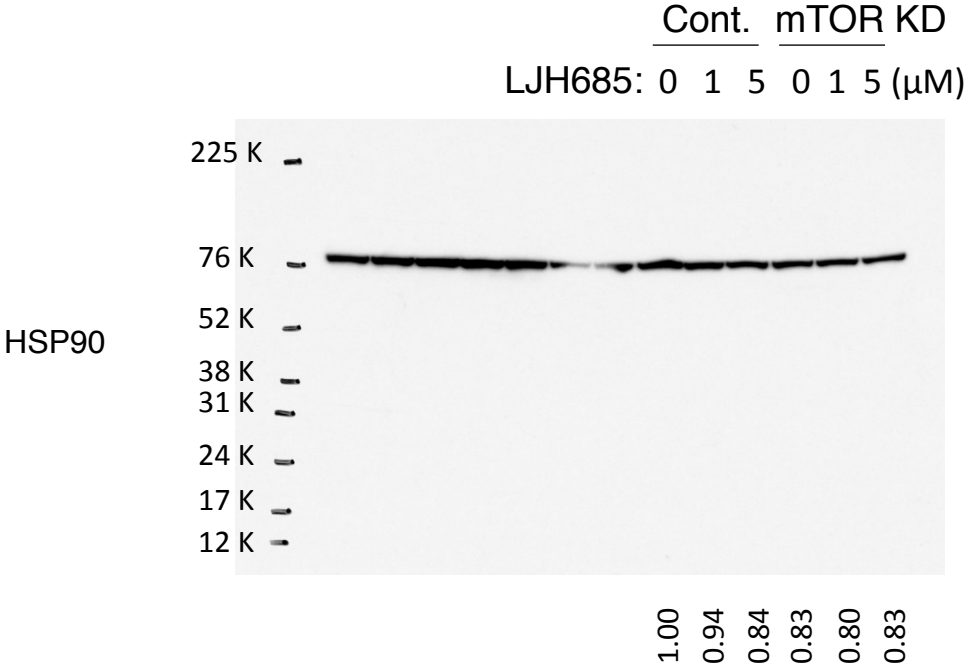

Figure 6I

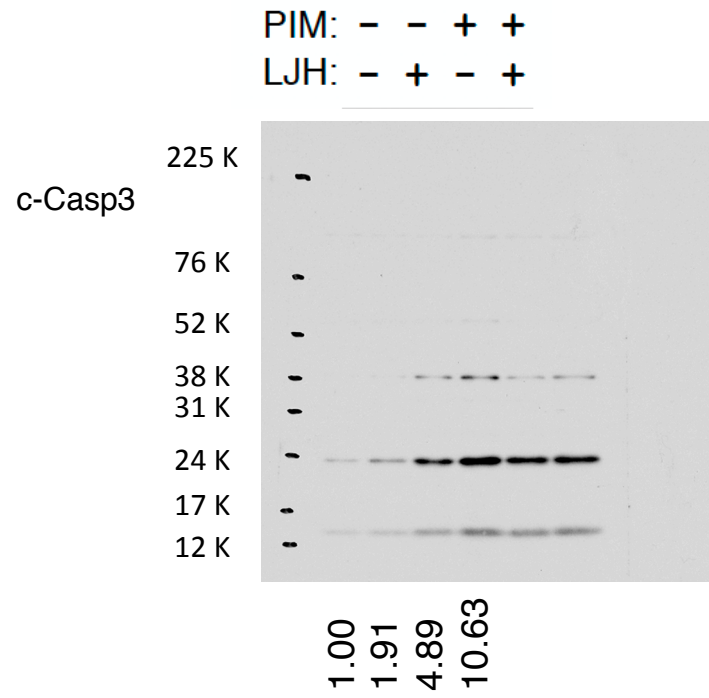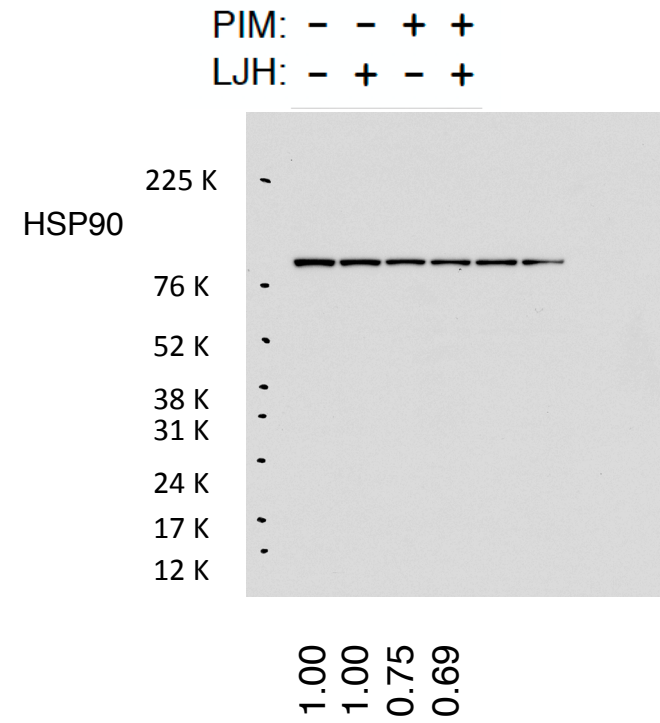

Supplement: s1 [file s1]
